# Supplementary material for: Molten plastic induced noncovalent interactions for tunable cellulose fast pyrolysis
Source: Royal Society of Chemistry journal article supplement (doi:10.1039/d3gc01312j), 2023-01-01
Supplement: d3gc01312j1.pdf [file d3gc01312j1.pdf]

## Supporting Information for “Molten Plastics Induced Noncovalent Interactions for Tunable Cellulose Fast Pyrolysis”

Fuat Sakirler, M. Doga Tekbas, and Hsi-Wu Wong\*

Department of Chemical Engineering, University of Massachusetts Lowell, One University Avenue, Lowell, Massachusetts 01854, United States

### Corresponding Author

\*E-mail: hsiwu\_wong@uml.edu

### Table of Contents

|                                                          |     |
|----------------------------------------------------------|-----|
| Table of Contents.....                                   | 1   |
| S1. Experimental Section.....                            | 2   |
| S2. Computational Methods.....                           | 7   |
| S3. Supporting Experimental Data.....                    | 8   |
| S4. Heat Transfer Model.....                             | 13  |
| S5. Supporting Computational Data .....                  | 14  |
| S6. Cartesian Coordinates of All Stationary Points ..... | 20  |
| S7. References.....                                      | 218 |

## S1. Experimental Section

**Materials.** Microcrystalline cellulose (CE, Alfa Aesar, degree of polymerization = 219, and bulk density of 0.28 g mL<sup>-1</sup>), polyethylene (PE, Sigma-Aldrich,  $M_w \approx 4000$  g mol<sup>-1</sup>,  $M_n \approx 1700$  g mol<sup>-1</sup>, and density = 0.92 g mL<sup>-1</sup>), polystyrene (PS, Sigma-Aldrich,  $M_w \approx 192\,000$  g mol<sup>-1</sup>, and density = 1.04 g mL<sup>-1</sup>), polyethylene glycol (PEG, Alfa Aesar,  $M_w \approx 20\,000$  g mol<sup>-1</sup> and density = 1.200 g mL<sup>-1</sup>), and polyketone (PK, Goodfellow PK306310, density = 1.240 g mL<sup>-1</sup>) were used for the pyrolysis experiments. Methanol (Alfa Aesar, environmental grade, 99.8+%) and dichloromethane (DCM, Alfa Aesar, environmental grade, 99.8+%) were used as solvents for product extraction. The standard chemicals used for gas chromatography (GC) calibration include acetic acid (AA, Alfa Aesar, glacial, 99+%), 2-furaldehyde (Alfa Aesar, 98%), 5-hydroxymethyl-2-furaldehyde (Alfa Aesar, 97%), and levoglucosan (LG, Acros Organics, 99+%) for CE-derived pyrolysis products and o-terphenyl (TCI, 99.0+%) as an external calibration standard.

**Sample Preparation.** To ensure rapid heating of the biomass samples, micrometer-scale thin-film samples were prepared following the thin-film deposition technique by Paulsen *et al.*<sup>1</sup> Briefly, for neat CE fast pyrolysis, 100  $\mu$ L of CE suspension in distilled water (5 wt % CE) was transferred into a 6 mm x 3 mm (diameter x height) copper autosampler pan (Shimadzu Scientific Instruments). Water was removed via heating on a hot plate (Fisher Scientific, Isotemp 7.25 x 7.25 in., HP 100 120V) at 120°C, resulting in a CE thin-film of approximately 5 mg and 111.84  $\mu$ m in the copper holder. For binary samples containing CE and one of PE, PS, PEG, and PK, the thickness of the samples was kept constant by changing mass loadings according to the densities of individual components. The sample thickness is calculated using the following equation:

$$\text{Thickness}_i = \frac{m_i / \rho_i}{\pi \cdot ID^2 / 4}$$

where  $\rho_i$  and  $ID$  are the density of species  $i$  and the internal diameter of the reactor, respectively. The thickness of the samples was verified using a digital caliper (the iGaging Cal Digital Calipers). The mass loading of PE, PS, PEG, and PK in the neat and co-pyrolysis experiments were determined to be 3.08, 4.10, 3.48, and 4.03 mg, respectively. Through these steps, the same thickness (223.68  $\mu$ m) was maintained across all samples to equalize the extent of inhibition of evaporation and thermal ejection.<sup>2</sup>

The sample preparation process of PE, PEG, and PK in the neat and co-pyrolysis experiments is summarized in **Figure S1**. These binary samples were prepared by manually mixing CE powder and each plastic powder homogeneously and

melting the binary samples containing PE, PEG, or PK to 92°C, 75°C, or 200°C, respectively, to allow the plastic phase to be molten.

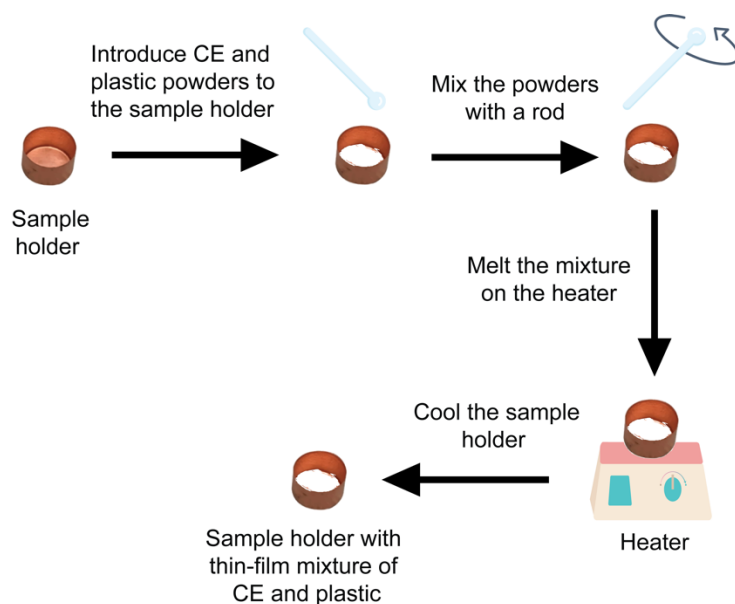

**Figure S1.** Schematic illustration of sample preparation for PE, PEG, and PK in the neat and co-pyrolysis experiments.

The sample preparation process of PS in the neat and co-pyrolysis experiments is summarized in **Figure S2**. For binary samples containing PS, dilute suspension of CE in DCM solutions dissolving PS were prepared based on target concentrations of CE ( $35.7 \text{ mg g}^{-1}$ ) and PS ( $29.3 \text{ mg g}^{-1}$ ). Approximately 1 ml of the sample solution was transferred into the copper holder, followed by evaporation of DCM on a hot plate at 100°C. In addition to the co-pyrolysis experiments, neat pyrolysis of PK without CE was performed as controls following the same procedure.

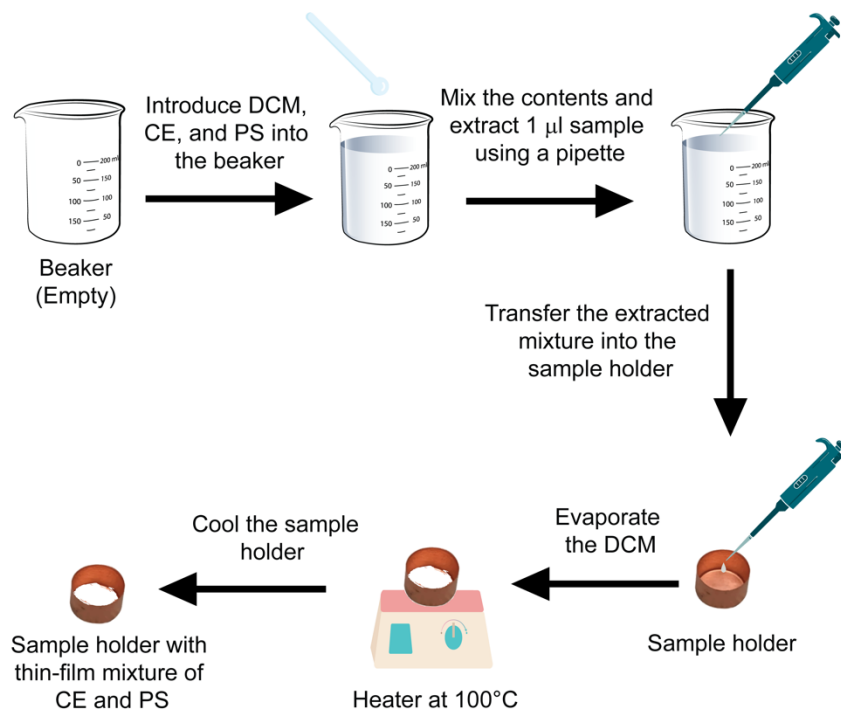

**Figure S2.** Schematic illustration of sample preparation for PS in the neat and co-pyrolysis experiments.

**Pyrolysis Experiments.** A custom-made batch reactor used in our previous work<sup>2,3</sup> was employed for the pyrolysis experiments. The reactor was first evacuated to  $<0.04$  torr before it was closed and placed into a hot furnace of two heating zones, each of which was controlled at the desired reaction temperature with a proportional–integral–derivative (PID) controller (Omega Engineering, CN742). Since measuring temporal evolution of the products was not our interest, we opted a reaction time of 15 min to ensure that cellulose-derived products reach equilibrium. This reaction time is also expected to be sufficiently long to observe the mass transfer effect caused by the molten plastic phase on cellulose pyrolysis, which is expected to slow down cellulose pyrolysis. Finally, we would also like to observe the catalytic effect of cellulose-derived char on thermoplastic pyrolysis, which would not be obvious unless a reaction time of this scale is employed. Since our reactor is designed to mimic semi-batch operations where reaction products are continually removed into the condenser positioned in a liquid nitrogen bath, we do not believe a long reaction time would create interference between the products made from different reaction timescales. The products from cellulose and different thermoplastics are also distinct so that they did not pose a challenge in our product analysis via GC.

The experiments were conducted by beginning with positioning the copper sample holder in the cold zone above the furnace. The sample holder was rapidly dropped into the hot zone to initiate the reaction, ensuring fast heating of the

samples. The condenser placed in the liquid-nitrogen bath was used to collect pyrolysis products throughout the reaction. Between 2 and 6 mg of o-terphenyl was placed inside the condenser prior to the experiments as an external standard. This reactor design mimics semi-batch reactions where volatile products are continuously removed *via* rapid thermal diffusion so that gas-phase reactions are minimized, yet the batch design allows easier mass balance closure. Once the reaction was completed, the reactor was removed from the hot furnace and cooled in a water bath at ambient temperature for 2 min. The condenser was also removed from the liquid-nitrogen bath and thawed to room temperature. The entire reactor assembly was subsequently connected to a vacuum chamber to collect gaseous products. The liquid products in the condenser were then extracted by equal volume of methanol and DCM. Both gaseous and liquid products were analyzed by GC. The experiments were repeated three times to ensure reproducibility. In this work, the average values are reported in the figures, and the standard deviations of the three repeated runs are used as error bars.

**Safety Statement.** No unexpected or unusually high safety hazards were encountered.

**Product Analysis.** The identification and quantification of the reaction products were performed using a Shimadzu GC-2010 Plus GC system equipped with a mass spectrometer (MS) and a flame ionization detector (FID) and a Shimadzu GC-2014 system equipped with a thermal conductivity detector (TCD) and FID. For gaseous products, 2 mL of the samples were injected into a Restek packed column (80486-810, 2 m) connected to a TCD. H<sub>2</sub> was used as the carrier gas through the column, with a flow rate set at 12.5 ml min<sup>-1</sup>. Peak identification and calibration were achieved from results obtained using standard gas mixtures containing CO, CO<sub>2</sub>, and C<sub>1</sub>–C<sub>4</sub> hydrocarbons (Scotty Specialty Gases). The GC was programmed with an injection temperature of 250°C, and the programmed temperature regime for the GC oven was: start at 35°C, ramp up to 50°C at 7.5°C min<sup>-1</sup>, hold for 1 min, ramp up to 100°C at 5°C min<sup>-1</sup>, hold for 3 min, ramp up to 200°C at 10°C min<sup>-1</sup>, hold for 7 min, ramp up to 250°C at 25°C min<sup>-1</sup>, and hold at 250°C for 10 min.

Identification of the extracted liquid products was achieved by injecting 3 µL of samples into the GC/MS system equipped with a Shimadzu Rxi-5Sil MS column (30 m). H<sub>2</sub> was used as the carrier gas through the column, with a flow rate set at 1.64 ml min<sup>-1</sup>. The GC was programmed with an injection temperature of 280°C and a split ratio of 7.0. The programmed temperature regime for the GC oven was: start at 31°C, hold for 5 min, ramp up to 100°C at 4°C min<sup>-1</sup>, hold for 5 min, ramp up to 150°C at 8°C min<sup>-1</sup>, hold for 5 min, ramp up to 175°C at 6°C min<sup>-1</sup>, hold for 5 min, ramp up to 275°C at 5°C min<sup>-1</sup>, and hold at 275°C for 18 min. Quantification of the extracted liquid products was performed

using the same GC system equipped with a Shimadzu Rxi-5Sil MS column (30 m). The GC was programmed with an injection temperature of 280°C and a split ratio of 10.0. H<sub>2</sub> was used as the carrier gas through the column, with a flow rate set at 0.44 ml min<sup>-1</sup>. The programmed temperature regime for the GC oven was set the same as the GC/MS program described above.

Mixtures of o-terphenyl (external standard), LG, 5-hydroxymethyl-2-furaldehyde, 2-furaldehyde, and AA in four different ratios, dissolved in 40 mL of methanol and 40 mL of DCM, were used as calibration standards for the quantification of CE-derived products in GC analysis.

The mass of the produced char was determined by the difference in weight of the copper sample holder before and after the reaction. The measurement was conducted using a Mettler Toledo XP105 analytical balance with a repeatability of < 0.05 mg.

The mass yields of the CE-derived products are calculated based on their individual mass determined by GC analysis relative to the CE mass initially loaded in the reactor:

$$\text{Mass yield}_i (\%) = \frac{m_i}{m_{CE,0}} \times 100$$

where  $m_i$  and  $m_{CE,0}$  are the mass of species  $i$  in the product mixture and mass of CE initially loaded in the reactor, respectively.

The carbon yields of the CE-derived products are calculated based on the moles of carbon atoms in the CE sample initially loaded, using the following equation:

$$\text{Carbon yield}_i (\%C) = \frac{\left(\frac{m_i}{MW_i}\right) \cdot N_{C,i}}{\left(\frac{m_{CE,0}}{MW_{glucose}}\right) \cdot N_{C,glucose}} \times 100$$

where  $MW_i$  is the molecular weight of species  $i$  in the product mixture,  $N_{C,i}$  is the number of carbon atoms in species  $i$ ,  $MW_{glucose}$  is the molecular weight of glucose (which is 180.16 g mol<sup>-1</sup>), and  $N_{C,glucose}$  is the number of carbon atoms in glucose (which is 6). Char is assumed to be pure carbon, where  $MW_{char}$  is set as 12.01 g mol<sup>-1</sup> and  $N_{C,char}$  is set as 1.

## S2. Computational Methods

Density functional theory (DFT) calculations were performed in the gas phase at the global hybrid meta M06-2X<sup>4</sup> functional coupled with the 6-31+G(2df,p) basis set using the Gaussian 16 package.<sup>5</sup> The functional M06-2X has been reported to accurately predict reaction barriers of carbohydrate systems.<sup>6</sup> The DFT-D3 empirical dispersion correction was included.<sup>7</sup> The D3-M06-2X functional has been shown to accurately estimate conformers, reaction energies, barriers, and noncovalent interactions on large main-group benchmark sets like the GMTKN55.<sup>8</sup> Partial charges were evaluated with the CHelpG scheme.<sup>9</sup>

Frequency calculations were performed to verify that all transition states (TSs) have exactly one negative frequency and all minima have zero imaginary frequency. The TSs were searched by the Berny algorithm.<sup>10</sup> Intrinsic reaction coordinate calculations using the Hessian-based predictor-corrector integration algorithm<sup>11-13</sup> were performed to confirm that each TS connects the reactant(s) and the product(s) of interest. Corrections to the harmonic oscillator approximation at low frequency modes were included using quasi-rigid-rotor-harmonic-oscillator approach proposed by Grimme,<sup>14</sup> which interpolates between the harmonic vibrational and free rotor entropy. The cut-off frequency was set to 150 cm<sup>-1</sup> (within the usual limits 50–150 cm<sup>-1</sup>). The exponent of the Head-Gordon damping function<sup>15</sup> was chosen as 4 (same value used by Grimme).

Given the large molecules studied, small changes in structures could lead to large electronic energy differences. In the absence of experimental structures, the geometries associated with the lowest energy levels were identified for each supramolecular system by starting the calculations with a set of different configurations, followed by manual distortion and re-optimization. For each elementary step studied, the Gibbs free energy of activation,  $\Delta^\ddagger G^0$ , was determined from the difference between the Gibbs free energy of the TS and that of the lowest-energy conformation found in this study. The rate constants were calculated using the transition-state theory based on the Eyring-Polanyi equation<sup>16, 17</sup> over a temperature range of 300–1500 K with an interval of 100 K. The reported activation energy and pre-exponential factor values were obtained from the Arrhenius plot.

In our DFT calculations, cellobiose, a dimer of CE containing a  $\beta$ -1,4 glycosidic bond, was employed as a model compound to investigate the reaction pathways of CE pyrolysis. Propane (C3), benzene (Bz), dimethyl ether (DME), and acetone (Ace) were used as surrogates for PE, PS, PEG, and PK, respectively.

### S3. Supporting Experimental Data

**Table S1.** Mass yields (in wt%) of cellulose-derived products from neat cellulose (CE) pyrolysis and co-pyrolysis of CE with polyethylene (CE+PE), polystyrene (CE+PS), polyethylene glycol (CE+PEG), or polyketone (CE+PK)<sup>a</sup>

| Products                          | Neat CE             | CE+PE               | CE+PS               | CE+PEG              | CE+PK               |
|-----------------------------------|---------------------|---------------------|---------------------|---------------------|---------------------|
| Levogluosan (LG)                  | 14.29 ± 5.51        | 30.62 ± 8.39        | 34.64 ± 1.25        | 32.88 ± 6.29        | 52.20 ± 1.59        |
| Levogluosenone (LGO)              | 0.00 ± 0.00         | 0.00 ± 0.00         | 0.48 ± 0.11         | 0.00 ± 0.00         | 0.00 ± 0.00         |
| Dianhydroglucopyranose (DAGP)     | 6.48 ± 4.27         | 2.27 ± 1.36         | 3.50 ± 2.87         | 3.37 ± 0.98         | 0.56 ± 0.49         |
| 1,6-Anhydroglucofuranose (AGF)    | 0.70 ± 0.36         | 2.49 ± 0.84         | 2.45 ± 0.19         | 1.63 ± 0.39         | 3.04 ± 0.08         |
| Glycolaldehyde (GA)               | 1.18 ± 0.34         | 2.75 ± 1.05         | 2.55 ± 0.75         | 7.77 ± 2.29         | 3.41 ± 0.55         |
| Acetic acid (AA)                  | 1.27 ± 0.38         | 3.86 ± 0.58         | 3.20 ± 0.58         | 3.22 ± 1.01         | 1.19 ± 0.11         |
| 5-Hydroxymethylfurfural (5-HMF)   | 2.30 ± 1.90         | 0.46 ± 0.80         | 3.60 ± 2.01         | 3.16 ± 1.58         | 1.05 ± 0.77         |
| 2-(5H)-Furanone (FO)              | 0.95 ± 0.50         | 0.34 ± 0.59         | 2.19 ± 2.45         | 0.95 ± 0.62         | 1.52 ± 0.05         |
| Furfural (FF)                     | 0.16 ± 0.20         | 0.00 ± 0.00         | 2.11 ± 1.89         | 0.08 ± 0.13         | 0.00 ± 0.00         |
| Carbon monoxide (CO)              | 1.16 ± 0.79         | 0.73 ± 0.55         | 0.43 ± 0.14         | 0.23 ± 0.07         | 0.40 ± 0.34         |
| Carbon dioxide (CO <sub>2</sub> ) | 1.93 ± 1.23         | 1.85 ± 1.54         | 1.27 ± 1.02         | 1.38 ± 0.59         | 0.64 ± 0.17         |
| Char                              | 1.90 ± 0.32         | 1.33 ± 2.14         | 0.91 ± 0.79         | 0.88 ± 0.77         | 0.93 ± 0.44         |
| <b>Total</b>                      | <b>32.33 ± 3.14</b> | <b>46.71 ± 6.99</b> | <b>57.33 ± 0.65</b> | <b>55.54 ± 1.15</b> | <b>64.95 ± 0.24</b> |

<sup>a</sup> Some high uncertainties reflected by the large standard deviation values are attributed to the low species yields.



**Figure S3a** shows the carbon yields of CE-derived products from neat CE pyrolysis as well as binary co-pyrolysis of CE with PE, PS, PEG, or PK, while **Figure S3b** depicts the corresponding selectivity toward CE-derived anhydrosugars, small oxygenates, furans, gases, and char. The same trend was observed comparing the carbon yields with mass yields shown in **Figure 1**. However, the absolute values of carbon yields are higher since the mass of undetected water is excluded in this calculation.

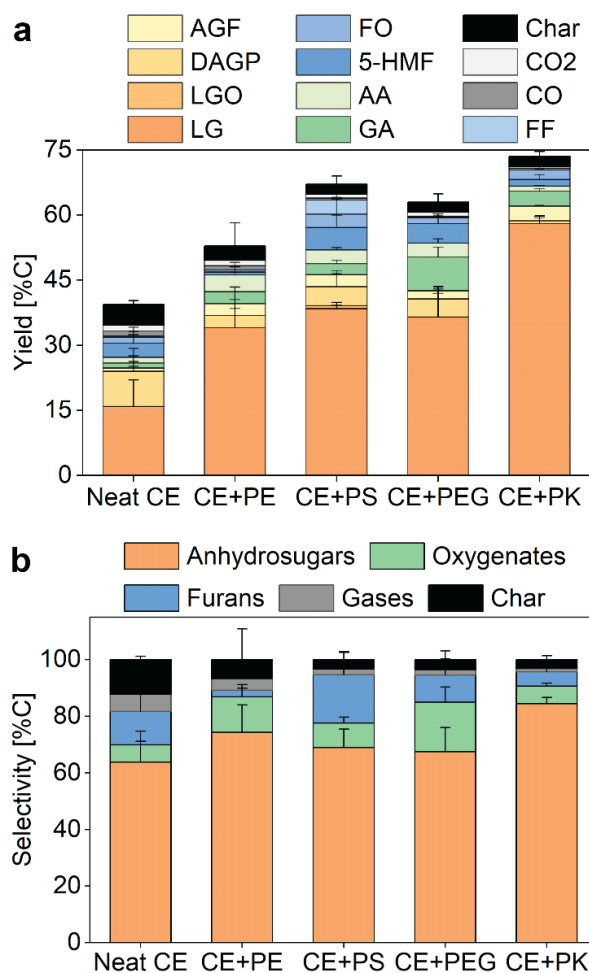

**Figure S3.** (a) Carbon yields of CE-derived products and (b) selectivity toward CE-derived anhydrosugars, small oxygenates, furans, gases, and char from neat CE pyrolysis and co-pyrolysis of CE with PE (CE+PE), PS (CE+PS), PEG (CE+PEG), or PK (CE+PK). Yields are shown for levoglucosan (LG), levoglucosenone (LGO), dianhydroglucopyranose (DAGP), 1,6-anhydroglucofuranose (AGF), glycolaldehyde (GA), acetic acid (AA), 5-hydroxymethylfurfural (5-HMF), 2-(5H)-furanone (FO), furfural (FF), carbon monoxide (CO), carbon dioxide (CO<sub>2</sub>), and char. Reaction condition: 5.0 mg of CE co-pyrolyzed with PE (3.08 mg), PS (4.10 mg), PEG (3.48 mg), or PK (4.03 mg) at 500°C under vacuum (< 0.04 torr). The mass loading of each plastic component was chosen to ensure that the thickness of the samples was kept constant and the extent of inhibition of evaporation and thermal ejection approximately equal.

**Table S2.** Carbon yields (%C) of CE-derived products from neat CE pyrolysis and co-pyrolysis of CE with PE (CE+PE), PS (CE+PS), PEG (CE+PEG), or PK (CE+PK)<sup>a</sup>

| Products                          | Neat CE             | CE+PE               | CE+PS               | CE+PEG              | CE+PK               |
|-----------------------------------|---------------------|---------------------|---------------------|---------------------|---------------------|
| Levoglucofan (LG)                 | 15.86 ± 6.11        | 34.02 ± 9.34        | 38.43 ± 1.45        | 36.52 ± 6.99        | 58.01 ± 1.77        |
| Levoglucofanone (LGO)             | 0.00 ± 0.00         | 0.00 ± 0.00         | 0.69 ± 0.16         | 0.00 ± 0.00         | 0.00 ± 0.00         |
| Dianhydroglucopyranose (DAGP)     | 8.10 ± 5.34         | 2.82 ± 1.66         | 4.39 ± 3.62         | 4.21 ± 1.23         | 0.71 ± 0.62         |
| 1,6-Anhydroglucofuranose (AGF)    | 0.78 ± 0.40         | 2.77 ± 0.94         | 2.72 ± 0.22         | 1.81 ± 0.43         | 3.38 ± 0.09         |
| Glycolaldehyde (GA)               | 1.18 ± 0.34         | 2.75 ± 1.06         | 2.55 ± 0.77         | 7.76 ± 2.30         | 3.41 ± 0.56         |
| Acetic acid (AA)                  | 1.28 ± 0.39         | 3.86 ± 0.58         | 3.19 ± 0.58         | 3.22 ± 1.01         | 1.19 ± 0.11         |
| 5-Hydroxymethylfurfural (5-HMF)   | 3.28 ± 2.71         | 0.66 ± 1.14         | 5.15 ± 2.85         | 4.51 ± 2.26         | 1.50 ± 1.09         |
| 2-(5H)-Furanone (FO)              | 1.36 ± 0.70         | 0.49 ± 0.84         | 3.13 ± 3.50         | 1.36 ± 0.88         | 2.17 ± 0.08         |
| Furfural (FF)                     | 0.25 ± 0.31         | 0.00 ± 0.00         | 3.21 ± 2.85         | 0.11 ± 0.20         | 0.00 ± 0.00         |
| Carbon monoxide (CO)              | 1.20 ± 0.85         | 0.93 ± 0.78         | 0.46 ± 0.15         | 0.25 ± 0.08         | 0.42 ± 0.37         |
| Carbon dioxide (CO <sub>2</sub> ) | 1.28 ± 0.84         | 1.26 ± 1.05         | 0.86 ± 0.69         | 0.96 ± 0.42         | 0.44 ± 0.12         |
| Char                              | 4.81 ± 0.90         | 3.34 ± 5.34         | 2.27 ± 1.98         | 2.25 ± 1.95         | 2.33 ± 1.09         |
| <b>Total</b>                      | <b>39.39 ± 5.09</b> | <b>52.89 ± 4.51</b> | <b>67.06 ± 1.52</b> | <b>62.97 ± 1.91</b> | <b>73.56 ± 0.87</b> |

<sup>a</sup> Some high uncertainties reflected by the large standard deviation values are attributed to the low species yields.

**Table S3.** Mass yields (in wt%) of polyethylene-derived products (linear alkanes, alkenes, and dienes) from neat polyethylene (PE) pyrolysis and co-pyrolysis of PE with cellulose (CE+PE)<sup>a</sup>

| <b>Alkenes</b> | <b>Neat PE</b>     | <b>CE+PE</b>       | <b>Alkanes</b> | <b>Neat PE</b>     | <b>CE+PE</b>       | <b>Dienes</b> | <b>Neat PE</b>     | <b>CE+PE</b>       |
|----------------|--------------------|--------------------|----------------|--------------------|--------------------|---------------|--------------------|--------------------|
| C1             | -                  | -                  | C1             | 0.02 ± 0.01        | 0.02 ± 0.01        | C1            | -                  | -                  |
| C2             | 0.01 ± 0.00        | 0.02 ± 0.01        | C2             | 0.01 ± 0.01        | 0.01 ± 0.00        | C2            | -                  | -                  |
| C3             | 0.01 ± 0.01        | 0.01 ± 0.01        | C3             | 0.01 ± 0.01        | 0.03 ± 0.02        | C3            | 0.00 ± 0.00        | 0.00 ± 0.00        |
| C4             | 0.00 ± 0.00        | 0.00 ± 0.00        | C4             | 0.00 ± 0.00        | 0.00 ± 0.00        | C4            | 0.00 ± 0.00        | 0.00 ± 0.00        |
| C5             | 0.00 ± 0.00        | 0.01 ± 0.01        | C5             | 0.01 ± 0.01        | 0.01 ± 0.01        | C5            | 0.00 ± 0.00        | 0.00 ± 0.00        |
| C6             | 0.00 ± 0.00        | 0.00 ± 0.01        | C6             | 0.00 ± 0.01        | 0.00 ± 0.01        | C6            | 0.00 ± 0.00        | 0.00 ± 0.00        |
| C7             | 0.12 ± 0.06        | 0.15 ± 0.08        | C7             | 0.05 ± 0.06        | 0.08 ± 0.04        | C7            | 0.07 ± 0.06        | 0.13 ± 0.10        |
| C8             | 0.07 ± 0.01        | 0.11 ± 0.09        | C8             | 0.08 ± 0.03        | 0.09 ± 0.05        | C8            | 0.06 ± 0.04        | 0.06 ± 0.03        |
| C9             | 0.04 ± 0.01        | 0.10 ± 0.11        | C9             | 0.04 ± 0.02        | 0.06 ± 0.03        | C9            | 0.04 ± 0.03        | 0.04 ± 0.01        |
| C10            | 0.08 ± 0.02        | 0.13 ± 0.15        | C10            | 0.04 ± 0.01        | 0.05 ± 0.04        | C10           | 0.05 ± 0.00        | 0.05 ± 0.04        |
| C11            | 0.09 ± 0.01        | 0.11 ± 0.05        | C11            | 0.07 ± 0.01        | 0.08 ± 0.07        | C11           | 0.03 ± 0.02        | 0.11 ± 0.14        |
| C12            | 0.08 ± 0.02        | 0.12 ± 0.11        | C12            | 0.06 ± 0.01        | 0.07 ± 0.05        | C12           | 0.04 ± 0.03        | 0.04 ± 0.03        |
| C13            | 0.05 ± 0.03        | 0.08 ± 0.08        | C13            | 0.05 ± 0.02        | 0.06 ± 0.03        | C13           | 0.03 ± 0.01        | 0.03 ± 0.02        |
| C14            | 0.06 ± 0.04        | 0.12 ± 0.07        | C14            | 0.03 ± 0.02        | 0.06 ± 0.02        | C14           | 0.01 ± 0.01        | 0.03 ± 0.02        |
| C15            | 0.06 ± 0.04        | 0.03 ± 0.06        | C15            | 0.05 ± 0.03        | 0.03 ± 0.05        | C15           | 0.02 ± 0.01        | 0.01 ± 0.02        |
| C16            | 0.07 ± 0.02        | 0.03 ± 0.05        | C16            | 0.06 ± 0.02        | 0.03 ± 0.05        | C16           | 0.01 ± 0.01        | 0.01 ± 0.01        |
| C17            | 0.07 ± 0.02        | 0.21 ± 0.13        | C17            | 0.07 ± 0.01        | 0.12 ± 0.07        | C17           | 0.01 ± 0.01        | 0.05 ± 0.03        |
| C18            | 0.09 ± 0.01        | 0.14 ± 0.10        | C18            | 0.08 ± 0.01        | 0.10 ± 0.07        | C18           | 0.02 ± 0.01        | 0.07 ± 0.06        |
| C19            | 0.01 ± 0.02        | 0.03 ± 0.04        | C19            | 0.00 ± 0.01        | 0.01 ± 0.02        | C19           | 0.01 ± 0.01        | 0.01 ± 0.01        |
| C20            | 0.10 ± 0.02        | 0.17 ± 0.13        | C20            | 0.08 ± 0.04        | 0.18 ± 0.13        | C20           | 0.05 ± 0.04        | 0.04 ± 0.02        |
| C21            | 0.09 ± 0.03        | 0.15 ± 0.11        | C21            | 0.09 ± 0.03        | 0.14 ± 0.11        | C21           | 0.03 ± 0.01        | 0.09 ± 0.07        |
| C22            | 0.10 ± 0.04        | 0.17 ± 0.14        | C22            | 0.08 ± 0.04        | 0.10 ± 0.07        | C22           | 0.03 ± 0.02        | 0.09 ± 0.08        |
| C23            | 0.09 ± 0.05        | 0.17 ± 0.09        | C23            | 0.08 ± 0.03        | 0.14 ± 0.05        | C23           | 0.02 ± 0.01        | 0.04 ± 0.02        |
| C24            | 0.04 ± 0.01        | 0.17 ± 0.14        | C24            | 0.04 ± 0.01        | 0.09 ± 0.04        | C24           | 0.03 ± 0.03        | 0.11 ± 0.15        |
| C25            | 0.03 ± 0.03        | 0.15 ± 0.09        | C25            | 0.03 ± 0.02        | 0.10 ± 0.05        | C25           | 0.02 ± 0.03        | 0.06 ± 0.02        |
| C26            | 0.03 ± 0.03        | 0.23 ± 0.16        | C26            | 0.03 ± 0.03        | 0.09 ± 0.04        | C26           | 0.02 ± 0.01        | 0.08 ± 0.06        |
| C27            | 0.02 ± 0.04        | 0.07 ± 0.07        | C27            | 0.00 ± 0.01        | 0.09 ± 0.08        | C27           | 0.00 ± 0.01        | 0.04 ± 0.04        |
| <b>Total</b>   | <b>1.41 ± 0.04</b> | <b>2.69 ± 1.40</b> | <b>Total</b>   | <b>1.18 ± 0.16</b> | <b>1.82 ± 0.88</b> | <b>Total</b>  | <b>0.61 ± 0.20</b> | <b>1.20 ± 0.67</b> |

<sup>a</sup> Some high uncertainties reflected by the large standard deviation values are attributed to the low species yields.

**Table S4.** Mass yields (in wt%) of polystyrene-derived products from neat polystyrene (PS) pyrolysis and co-pyrolysis of PS with cellulose (CE+PS)<sup>a</sup>

| Products                                  | Neat PS             | CE+PS                |
|-------------------------------------------|---------------------|----------------------|
| Benzene                                   | 0.06 ± 0.01         | 2.17 ± 2.12          |
| Toluene                                   | 0.78 ± 0.13         | 2.86 ± 1.80          |
| Styrene                                   | 27.01 ± 7.76        | 44.34 ± 9.73         |
| α-Methylstyrene                           | 0.02 ± 0.03         | 0.15 ± 0.05          |
| 2,4-Diphenyl-1-butene (styrene dimer)     | 2.95 ± 0.28         | 5.20 ± 1.63          |
| 2,4,6-Triphenyl-1-hexene (styrene trimer) | 9.53 ± 2.62         | 14.34 ± 2.33         |
| <b>Total</b>                              | <b>40.35 ± 7.15</b> | <b>69.06 ± 15.24</b> |

<sup>a</sup> Some high uncertainties reflected by the large standard deviation values are attributed to the low species yields.

**Table S5.** Mass yields (in wt%) of polyethylene glycol-derived products from neat polyethylene glycol (PEG) pyrolysis and co-pyrolysis of PEG with cellulose (CE+PEG)<sup>a</sup>

| Products                                                                                 | Neat PEG           | CE+PEG              |
|------------------------------------------------------------------------------------------|--------------------|---------------------|
| 1-Pentanol (C <sub>5</sub> H <sub>12</sub> O)                                            | 1.06 ± 0.14        | 1.88 ± 0.78         |
| Ethylene glycol dimethyl ether (C <sub>4</sub> H <sub>10</sub> O <sub>2</sub> )          | 1.06 ± 0.34        | 7.56 ± 3.62         |
| 1-Heptanol (C <sub>7</sub> H <sub>16</sub> O)                                            | 0.00 ± 0.00        | 0.30 ± 0.45         |
| Diethylene glycol diethyl ether (C <sub>8</sub> H <sub>18</sub> O <sub>3</sub> )         | 0.88 ± 0.22        | 2.60 ± 1.64         |
| Pentaethylene glycol (C <sub>10</sub> H <sub>12</sub> O <sub>6</sub> )                   | 0.00 ± 0.00        | 0.53 ± 0.32         |
| Tetraethylene glycol dimethyl ether (C <sub>10</sub> H <sub>22</sub> O <sub>5</sub> )    | 0.00 ± 0.00        | 0.20 ± 0.09         |
| Hexaethylene glycol monomethyl ether (C <sub>13</sub> H <sub>28</sub> O <sub>7</sub> )   | 0.00 ± 0.00        | 0.17 ± 0.15         |
| Triethylene glycol monodecyl ether (C <sub>16</sub> H <sub>34</sub> O <sub>4</sub> )     | 0.00 ± 0.00        | 0.29 ± 0.12         |
| Tetrapropylene glycol monopropyl ether (C <sub>15</sub> H <sub>32</sub> O <sub>5</sub> ) | 0.00 ± 0.00        | 0.25 ± 0.25         |
| Pentaohexacosanol (C <sub>16</sub> H <sub>34</sub> O <sub>6</sub> )                      | 0.00 ± 0.00        | 0.12 ± 0.06         |
| Hexaoxatricosane (C <sub>17</sub> H <sub>36</sub> O <sub>6</sub> )                       | 0.00 ± 0.00        | 1.06 ± 1.68         |
| <b>Total</b>                                                                             | <b>3.00 ± 0.13</b> | <b>14.96 ± 2.19</b> |

<sup>a</sup> Some high uncertainties reflected by the large standard deviation values are attributed to the low species yields.

## S4. Heat Transfer Model

A heat transfer model was built using the COMSOL Multiphysics® software<sup>18</sup> to estimate the heating rate of a sample during CE fast pyrolysis in our microreactor reactor. In this model, the temperature gradient in the radial direction within the sample is assumed to be negligible. As a result, the system can be solved in the one-dimension domain. The average heating rate of a reaction time  $t$  can be calculated using the following equation:

$$\text{Average heating rate (} t \text{)} = \frac{T_i - T_0}{t}$$

where  $T_i$  and  $T_0$  are the final and initial temperature, respectively. The thermal and physical parameters used in the model are summarized in **Table S6**.

**Table S6.** Parameters used in the heat transfer model.

|                                               | Cellulose | Copper | Glass  |
|-----------------------------------------------|-----------|--------|--------|
| $\rho^a$ (kg m <sup>-3</sup> )                | 918       | 8,960  | 2,210  |
| $C_p^b$ (J kg <sup>-1</sup> K <sup>-1</sup> ) | 2,000     | 385    | 730    |
| $k^c$ (W m <sup>-1</sup> K <sup>-1</sup> )    | $f(T)^d$  | 400    | 1.4    |
| Thickness (mm)                                | 111.8     | 203.2  | 812.8  |
| $T_0$ (K)                                     | 298.15    | 298.15 | 773.15 |

<sup>a</sup>  $\rho$ : density

<sup>b</sup>  $C_p$ : heat capacity.

<sup>c</sup>  $k$ : thermal conductivity.

<sup>d</sup>  $f(T) = 1.81 \cdot 10^{-4} \cdot (T - 263.15) + 0.042$

The average temperature difference within the CE sample was found to be 0.3 K, with a deviation of 0.4 K. Thus, the heating rate was calculated based on the temperature at the center of the sample. As shown in **Figure S4**, the average heating rate decreases over time due to decreased temperature difference. The initial heating rate at 0.1 s was estimated as 2,322°C s<sup>-1</sup>. The model predicted that the time needed to reach 499°C inside the sample is 3.3 seconds.

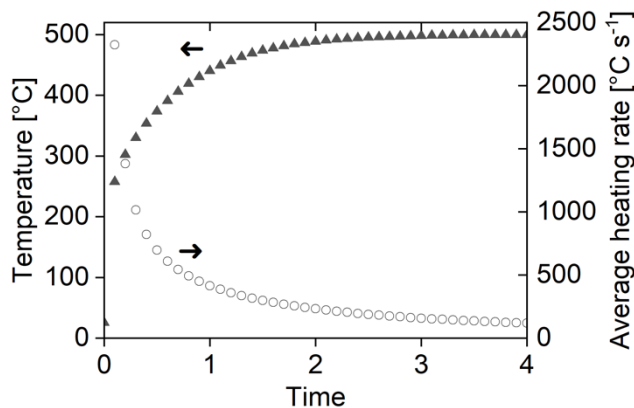

**Figure S4.** Estimated sample temperature and heating rate as a function of reaction time at the center of the CE sample.

## S5. Supporting Computational Data

**Table S7.** Kinetic parameters and rate constant ratios for the elementary steps in **Scheme 1** of the main text.

| Reaction                                            | Index                      | $A$ ( $s^{-1}$ )     | $E_a$ (kcal<br>mol $^{-1}$ ) | $k$ at 500°C<br>( $s^{-1}$ ) | $k_{C3}/k_{neat}$ at<br>500°C |
|-----------------------------------------------------|----------------------------|----------------------|------------------------------|------------------------------|-------------------------------|
| <b>Orange Path</b>                                  |                            |                      |                              |                              |                               |
| <b>1</b> $\rightarrow$ <b>2</b> + <b>i1</b>         | <b>TS1<sub>neat</sub></b>  | $2.3 \times 10^{12}$ | 48.3                         | $5.1 \times 10^{-2}$         | 0.93                          |
| <b>2</b> $\rightarrow$ <b>3</b> + <b>i2</b>         | <b>TS2<sub>neat</sub></b>  | $2.5 \times 10^{12}$ | 52.1                         | $4.6 \times 10^{-3}$         | 0.87                          |
| <b>Green Path</b>                                   |                            |                      |                              |                              |                               |
| <b>1</b> $\rightarrow$ <b>4</b>                     | <b>TS3<sub>neat</sub></b>  | $2.2 \times 10^{12}$ | 48.0                         | $6.0 \times 10^{-2}$         | 0.89                          |
| <b>4</b> $\rightarrow$ <b>5</b> + <b>i3</b>         | <b>TS4<sub>neat</sub></b>  | $3.5 \times 10^{13}$ | 36.3                         | $1.9 \times 10^3$            | 1.24                          |
| <b>5</b> $\rightarrow$ <b>6</b> + <b>i4</b>         | <b>TS5<sub>neat</sub></b>  | $5.2 \times 10^{12}$ | 32.9                         | $2.6 \times 10^3$            | 0.95                          |
| <b>Blue Path</b>                                    |                            |                      |                              |                              |                               |
| <b>1</b> $\rightarrow$ <b>4</b>                     | <b>TS3<sub>neat</sub></b>  | $2.2 \times 10^{12}$ | 48.0                         | $6.0 \times 10^{-2}$         | 0.89                          |
| <b>4</b> $\rightarrow$ <b>7</b>                     | <b>TS6<sub>neat</sub></b>  | $1.1 \times 10^{12}$ | 32.4                         | $7.9 \times 10^2$            | 0.87                          |
| <b>7</b> $\rightarrow$ <b>8</b>                     | <b>TS7<sub>neat</sub></b>  | $6.2 \times 10^{12}$ | 36.5                         | $3.0 \times 10^2$            | 1.07                          |
| <b>8</b> $\rightarrow$ <b>9</b> + H <sub>2</sub> O  | <b>TS8<sub>neat</sub></b>  | $8.7 \times 10^{13}$ | 70.0                         | $1.4 \times 10^{-6}$         | 1.24                          |
| <b>9</b> $\rightarrow$ <b>10</b> + H <sub>2</sub> O | <b>TS9<sub>neat</sub></b>  | $5.7 \times 10^{12}$ | 37.6                         | $1.3 \times 10^2$            | 0.99                          |
| <b>10</b> $\rightarrow$ <b>11</b> + <b>i5</b>       | <b>TS10<sub>neat</sub></b> | $6.8 \times 10^{13}$ | 53.4                         | $5.4 \times 10^{-2}$         | 1.06                          |

**Table S8.** Kinetic parameters and rate constant ratios in the presence of C3, Bz, DME, or Ace for the elementary steps in **Scheme 1** of the main text.

| Reaction                                | $A$ ( $s^{-1}$ )     | $E_a$ (kcal mol $^{-1}$ ) | $k$ at 500°C ( $s^{-1}$ ) | $R$ at 500°C                  | $A$ ( $s^{-1}$ )     | $E_a$ (kcal mol $^{-1}$ ) | $k$ at 500°C ( $s^{-1}$ ) | $R$ at 500°C |
|-----------------------------------------|----------------------|---------------------------|---------------------------|-------------------------------|----------------------|---------------------------|---------------------------|--------------|
| <b>Orange Path</b>                      |                      |                           |                           |                               |                      |                           |                           |              |
| <u>In the presence of C3</u>            |                      |                           |                           | <u>In the presence of DME</u> |                      |                           |                           |              |
| <b>1</b> → <b>2</b> + <b>i1</b>         | $3.9 \times 10^{12}$ | 48.8                      | $6.2 \times 10^{-2}$      | 1.00                          | $4.7 \times 10^{12}$ | 51.9                      | $9.7 \times 10^{-3}$      | 0.16         |
| <b>2</b> → <b>3</b> + <b>i2</b>         | $5.7 \times 10^{12}$ | 53.6                      | $4.0 \times 10^{-3}$      | 1.00                          | $7.0 \times 10^{12}$ | 54.6                      | $2.6 \times 10^{-3}$      | 0.65         |
| <u>In the presence of Bz</u>            |                      |                           |                           | <u>In the presence of Ace</u> |                      |                           |                           |              |
| <b>1</b> → <b>2</b> + <b>i1</b>         | $1.1 \times 10^{13}$ | 51.4                      | $3.3 \times 10^{-2}$      | 0.53                          | $2.8 \times 10^{12}$ | 50.9                      | $1.1 \times 10^{-2}$      | 0.18         |
| <b>2</b> → <b>3</b> + <b>i2</b>         | $7.0 \times 10^{12}$ | 55.5                      | $1.4 \times 10^{-3}$      | 0.35                          | $8.9 \times 10^{12}$ | 52.9                      | $1.0 \times 10^{-2}$      | 2.52         |
| <b>Green Path</b>                       |                      |                           |                           |                               |                      |                           |                           |              |
| <u>In the presence of C3</u>            |                      |                           |                           | <u>In the presence of DME</u> |                      |                           |                           |              |
| <b>1</b> → <b>4</b>                     | $2.0 \times 10^{12}$ | 48.0                      | $5.4 \times 10^{-2}$      | 1.00                          | $1.8 \times 10^{13}$ | 49.7                      | $1.7 \times 10^{-1}$      | 3.11         |
| <b>4</b> → <b>5</b> + <b>i3</b>         | $1.1 \times 10^{14}$ | 37.8                      | $2.4 \times 10^3$         | 1.00                          | $2.0 \times 10^{13}$ | 31.5                      | $2.5 \times 10^4$         | 10.5         |
| <b>5</b> → <b>6</b> + <b>i4</b>         | $5.1 \times 10^{12}$ | 33.0                      | $2.4 \times 10^3$         | 1.00                          | $5.3 \times 10^{12}$ | 35.6                      | $4.5 \times 10^2$         | 0.19         |
| <u>In the presence of Bz</u>            |                      |                           |                           | <u>In the presence of Ace</u> |                      |                           |                           |              |
| <b>1</b> → <b>4</b>                     | $6.6 \times 10^{12}$ | 51.4                      | $2.0 \times 10^{-2}$      | 0.37                          | $8.6 \times 10^{12}$ | 51.7                      | $2.1 \times 10^{-2}$      | 0.38         |
| <b>4</b> → <b>5</b> + <b>i3</b>         | $3.1 \times 10^{13}$ | 28.7                      | $2.3 \times 10^5$         | 97.7                          | $4.7 \times 10^{13}$ | 33.5                      | $1.6 \times 10^4$         | 6.95         |
| <b>5</b> → <b>6</b> + <b>i4</b>         | $1.5 \times 10^{13}$ | 33.2                      | $6.4 \times 10^3$         | 2.63                          | $5.2 \times 10^{12}$ | 33.4                      | $1.9 \times 10^3$         | 0.78         |
| <b>Blue Path</b>                        |                      |                           |                           |                               |                      |                           |                           |              |
| <u>In the presence of C3</u>            |                      |                           |                           | <u>In the presence of DME</u> |                      |                           |                           |              |
| <b>1</b> → <b>4</b>                     | $2.0 \times 10^{12}$ | 48.0                      | $5.4 \times 10^{-2}$      | 1.00                          | $1.8 \times 10^{13}$ | 49.7                      | $1.7 \times 10^{-1}$      | 3.11         |
| <b>4</b> → <b>7</b>                     | $1.5 \times 10^{12}$ | 33.0                      | $6.9 \times 10^2$         | 1.00                          | $2.4 \times 10^{12}$ | 35.6                      | $2.1 \times 10^2$         | 0.31         |
| <b>7</b> → <b>8</b>                     | $3.3 \times 10^{12}$ | 35.4                      | $3.2 \times 10^2$         | 1.00                          | $8.2 \times 10^{12}$ | 32.2                      | $6.4 \times 10^3$         | 19.9         |
| <b>8</b> → <b>9</b> + H <sub>2</sub> O  | $2.1 \times 10^{14}$ | 71.0                      | $1.8 \times 10^{-6}$      | 1.00                          | $7.5 \times 10^{13}$ | 66.9                      | $9.4 \times 10^{-6}$      | 5.31         |
| <b>9</b> → <b>10</b> + H <sub>2</sub> O | $2.3 \times 10^{12}$ | 36.3                      | $1.3 \times 10^2$         | 1.00                          | $3.0 \times 10^{12}$ | 35.7                      | $2.3 \times 10^2$         | 1.82         |
| <b>10</b> → <b>11</b> + <b>i5</b>       | $1.2 \times 10^{14}$ | 54.2                      | $5.7 \times 10^{-2}$      | 1.00                          | $1.5 \times 10^{13}$ | 48.9                      | $2.2 \times 10^{-1}$      | 3.83         |
| <u>In the presence of Bz</u>            |                      |                           |                           | <u>In the presence of Ace</u> |                      |                           |                           |              |
| <b>1</b> → <b>4</b>                     | $6.6 \times 10^{12}$ | 51.4                      | $2.0 \times 10^{-2}$      | 0.37                          | $8.6 \times 10^{12}$ | 51.7                      | $2.1 \times 10^{-2}$      | 0.38         |
| <b>4</b> → <b>7</b>                     | $1.3 \times 10^{12}$ | 32.6                      | $7.6 \times 10^2$         | 1.10                          | $2.2 \times 10^{13}$ | 36.4                      | $1.2 \times 10^3$         | 1.70         |
| <b>7</b> → <b>8</b>                     | $2.0 \times 10^{13}$ | 35.4                      | $1.9 \times 10^3$         | 6.08                          | $7.5 \times 10^{12}$ | 33.8                      | $2.1 \times 10^3$         | 6.49         |
| <b>8</b> → <b>9</b> + H <sub>2</sub> O  | $2.6 \times 10^{14}$ | 69.8                      | $4.9 \times 10^{-6}$      | 2.75                          | $2.3 \times 10^{14}$ | 67.0                      | $2.7 \times 10^{-5}$      | 15.2         |
| <b>9</b> → <b>10</b> + H <sub>2</sub> O | $1.2 \times 10^{13}$ | 38.2                      | $1.9 \times 10^2$         | 1.45                          | $1.6 \times 10^{13}$ | 38.0                      | $2.8 \times 10^2$         | 2.18         |
| <b>10</b> → <b>11</b> + <b>i5</b>       | $5.8 \times 10^{13}$ | 49.4                      | $6.3 \times 10^{-1}$      | 11.1                          | $2.8 \times 10^{13}$ | 51.4                      | $8.0 \times 10^{-2}$      | 1.41         |

**Table S9.** Energetic information of TSs for C–O cleavage **1** → **2** + **i1** in the absence of any surrogates and in the presence of C3, Bz, DME, or Ace at the M06-2X/6-31+G(2df,p) level of theory. The zero-point corrected energy, enthalpy, and Gibbs free energies are given relative to **1** in the absence of any surrogates or in the presence of C3, Bz, DME, or Ace, respectively.

| Index                     | $\Delta^\ddagger E^0$ at 0 K<br>(kcal mol <sup>-1</sup> ) | $\Delta^\ddagger H^0$ at 773.15 K<br>(kcal mol <sup>-1</sup> ) | $\Delta^\ddagger G^0$ at 773.15 K<br>(kcal mol <sup>-1</sup> ) |
|---------------------------|-----------------------------------------------------------|----------------------------------------------------------------|----------------------------------------------------------------|
| <b>TS1<sub>neat</sub></b> | 48.1                                                      | 46.2                                                           | 51.4                                                           |
| <b>TS1<sub>C3</sub></b>   | 48.6                                                      | 46.7                                                           | 51.5                                                           |
| <b>TS1<sub>Bz</sub></b>   | 50.8                                                      | 49.5                                                           | 52.0                                                           |
| <b>TS1<sub>DME</sub></b>  | 51.4                                                      | 50.0                                                           | 53.9                                                           |
| <b>TS1<sub>Ace</sub></b>  | 50.6                                                      | 49.2                                                           | 53.7                                                           |

**Table S10.** Energetic information of TSs for C–O cleavage **2** → **3** + **i2** in the absence of any surrogates and in the presence of C3, Bz, DME, or Ace at the M06-2X/6-31+G(2df,p) level of theory. The zero-point corrected energy, enthalpy, and Gibbs free energies are given relative to **2** in the absence of any surrogates or in the presence of C3, Bz, DME, or Ace, respectively.

| Index                     | $\Delta^\ddagger E^0$ at 0 K<br>(kcal mol <sup>-1</sup> ) | $\Delta^\ddagger H^0$ at 773.15 K<br>(kcal mol <sup>-1</sup> ) | $\Delta^\ddagger G^0$ at 773.15 K<br>(kcal mol <sup>-1</sup> ) |
|---------------------------|-----------------------------------------------------------|----------------------------------------------------------------|----------------------------------------------------------------|
| <b>TS2<sub>neat</sub></b> | 51.9                                                      | 50.0                                                           | 55.1                                                           |
| <b>TS2<sub>C3</sub></b>   | 53.5                                                      | 52.0                                                           | 55.2                                                           |
| <b>TS2<sub>Bz</sub></b>   | 55.2                                                      | 53.8                                                           | 56.9                                                           |
| <b>TS2<sub>DME</sub></b>  | 55.9                                                      | 54.6                                                           | 55.7                                                           |
| <b>TS2<sub>Ace</sub></b>  | 52.6                                                      | 51.2                                                           | 53.8                                                           |

**Table S11.** Energetic information of TSs for ring opening **1** → **4** in the absence of any surrogates or in the presence of C3, Bz, DME, or Ace at the M06-2X/6-31+G(2df,p) level of theory. The zero-point corrected energy, enthalpy, and Gibbs free energies are given relative to **1** in the absence of any surrogates or in the presence of C3, Bz, DME, or Ace, respectively.

| Index                     | $\Delta^\ddagger E^0$ at 0 K<br>(kcal mol <sup>-1</sup> ) | $\Delta^\ddagger H^0$ at 773.15 K<br>(kcal mol <sup>-1</sup> ) | $\Delta^\ddagger G^0$ at 773.15 K<br>(kcal mol <sup>-1</sup> ) |
|---------------------------|-----------------------------------------------------------|----------------------------------------------------------------|----------------------------------------------------------------|
| <b>TS3<sub>neat</sub></b> | 47.7                                                      | 45.8                                                           | 51.2                                                           |
| <b>TS3<sub>C3</sub></b>   | 47.8                                                      | 45.8                                                           | 51.3                                                           |
| <b>TS3<sub>Bz</sub></b>   | 51.0                                                      | 49.3                                                           | 52.9                                                           |
| <b>TS3<sub>DME</sub></b>  | 48.8                                                      | 48.1                                                           | 49.6                                                           |
| <b>TS3<sub>Ace</sub></b>  | 51.4                                                      | 50.1                                                           | 52.8                                                           |



**Table S12.** Energetic information of TSs for retro-aldol  $4 \rightarrow 5 + \mathbf{i3}$  in the absence of any surrogates or in the presence of C3, Bz, DME, or Ace at the M06-2X/6-31+G(2df,p) level of theory. The zero-point corrected energy, enthalpy, and Gibbs free energies are given relative to  $4$  in the absence of any surrogates or in the presence of C3, Bz, DME, or Ace, respectively.

| Index                     | $\Delta^\ddagger E^0$ at 0 K<br>(kcal mol <sup>-1</sup> ) | $\Delta^\ddagger H^0$ at 773.15 K<br>(kcal mol <sup>-1</sup> ) | $\Delta^\ddagger G^0$ at 773.15 K<br>(kcal mol <sup>-1</sup> ) |
|---------------------------|-----------------------------------------------------------|----------------------------------------------------------------|----------------------------------------------------------------|
| <b>TS4<sub>neat</sub></b> | 35.6                                                      | 35.3                                                           | 35.2                                                           |
| <b>TS4<sub>C3</sub></b>   | 37.1                                                      | 37.1                                                           | 34.8                                                           |
| <b>TS4<sub>Bz</sub></b>   | 28.3                                                      | 27.7                                                           | 27.8                                                           |
| <b>TS4<sub>DME</sub></b>  | 30.9                                                      | 30.7                                                           | 31.2                                                           |
| <b>TS4<sub>Ace</sub></b>  | 32.9                                                      | 33.0                                                           | 31.8                                                           |

**Table S13.** Energetic information of TSs for retro-aldol  $5 \rightarrow 6 + \mathbf{i4}$  in the absence of any surrogates or in the presence of C3, Bz, DME, or Ace at the M06-2X/6-31+G(2df,p) level of theory. The zero-point corrected energy, enthalpy, and Gibbs free energies are given relative to  $5$  in the absence of any surrogates or in the presence of C3, Bz, DME, or Ace, respectively.

| Index                     | $\Delta^\ddagger E^0$ at 0 K<br>(kcal mol <sup>-1</sup> ) | $\Delta^\ddagger H^0$ at 773.15 K<br>(kcal mol <sup>-1</sup> ) | $\Delta^\ddagger G^0$ at 773.15 K<br>(kcal mol <sup>-1</sup> ) |
|---------------------------|-----------------------------------------------------------|----------------------------------------------------------------|----------------------------------------------------------------|
| <b>TS5<sub>neat</sub></b> | 32.2                                                      | 31.0                                                           | 34.8                                                           |
| <b>TS5<sub>C3</sub></b>   | 32.5                                                      | 31.2                                                           | 34.9                                                           |
| <b>TS5<sub>Bz</sub></b>   | 32.4                                                      | 31.1                                                           | 33.4                                                           |
| <b>TS5<sub>DME</sub></b>  | 34.8                                                      | 33.4                                                           | 37.5                                                           |
| <b>TS5<sub>Ace</sub></b>  | 32.9                                                      | 31.7                                                           | 35.2                                                           |

**Table S14.** Energetic information of TSs for isomerization  $4 \rightarrow 7$  in the absence of any surrogates or in the presence of C3, Bz, DME, or Ace at the M06-2X/6-31+G(2df,p) level of theory. The zero-point corrected energy, enthalpy, and Gibbs free energies are given relative to  $5$  in the absence of any surrogates or in the presence of C3, Bz, DME, or Ace, respectively.

| Index                     | $\Delta^\ddagger E^0$ at 0 K<br>(kcal mol <sup>-1</sup> ) | $\Delta^\ddagger H^0$ at 773.15 K<br>(kcal mol <sup>-1</sup> ) | $\Delta^\ddagger G^0$ at 773.15 K<br>(kcal mol <sup>-1</sup> ) |
|---------------------------|-----------------------------------------------------------|----------------------------------------------------------------|----------------------------------------------------------------|
| <b>TS6<sub>neat</sub></b> | 32.5                                                      | 30.4                                                           | 36.5                                                           |
| <b>TS6<sub>C3</sub></b>   | 33.2                                                      | 31.0                                                           | 36.7                                                           |
| <b>TS6<sub>Bz</sub></b>   | 32.7                                                      | 30.6                                                           | 36.6                                                           |
| <b>TS6<sub>DME</sub></b>  | 35.5                                                      | 33.9                                                           | 38.5                                                           |
| <b>TS6<sub>Ace</sub></b>  | 35.9                                                      | 35.0                                                           | 35.9                                                           |

**Table S15.** Energetic information of TSs for ring closing **7** → **8** in the absence of any surrogates or in the presence of C3, Bz, DME, or Ace at the M06-2X/6-31+G(2df,p) level of theory. The zero-point corrected energy, enthalpy, and Gibbs free energies are given relative to **7** in the absence of any surrogates or in the presence of C3, Bz, DME, or Ace, respectively.

| Index                     | $\Delta^\ddagger E^0$ at 0 K<br>(kcal mol <sup>-1</sup> ) | $\Delta^\ddagger H^0$ at 773.15 K<br>(kcal mol <sup>-1</sup> ) | $\Delta^\ddagger G^0$ at 773.15 K<br>(kcal mol <sup>-1</sup> ) |
|---------------------------|-----------------------------------------------------------|----------------------------------------------------------------|----------------------------------------------------------------|
| <b>TS7<sub>neat</sub></b> | 36.0                                                      | 34.9                                                           | 38.1                                                           |
| <b>TS7<sub>C3</sub></b>   | 34.8                                                      | 33.5                                                           | 38.0                                                           |
| <b>TS7<sub>Bz</sub></b>   | 34.7                                                      | 33.6                                                           | 35.2                                                           |
| <b>TS7<sub>DME</sub></b>  | 31.6                                                      | 30.3                                                           | 33.4                                                           |
| <b>TS7<sub>Ace</sub></b>  | 33.6                                                      | 32.4                                                           | 35.1                                                           |

**Table S16.** Energetic information of TSs for dehydration **8** → **9** + H<sub>2</sub>O in the absence of any surrogates or in the presence of C3, Bz, DME, or Ace at the M06-2X/6-31+G(2df,p) level of theory. The zero-point corrected energy, enthalpy, and Gibbs free energies are given relative to **8** in the absence of any surrogates or in the presence of C3, Bz, DME, or Ace, respectively.

| Index                     | $\Delta^\ddagger E^0$ at 0 K<br>(kcal mol <sup>-1</sup> ) | $\Delta^\ddagger H^0$ at 773.15 K<br>(kcal mol <sup>-1</sup> ) | $\Delta^\ddagger G^0$ at 773.15 K<br>(kcal mol <sup>-1</sup> ) |
|---------------------------|-----------------------------------------------------------|----------------------------------------------------------------|----------------------------------------------------------------|
| <b>TS8<sub>neat</sub></b> | 68.5                                                      | 69.2                                                           | 67.5                                                           |
| <b>TS8<sub>C3</sub></b>   | 69.2                                                      | 69.9                                                           | 67.2                                                           |
| <b>TS8<sub>Bz</sub></b>   | 68.1                                                      | 68.8                                                           | 65.6                                                           |
| <b>TS8<sub>DME</sub></b>  | 65.3                                                      | 65.8                                                           | 64.6                                                           |
| <b>TS8<sub>Ace</sub></b>  | 65.2                                                      | 65.8                                                           | 63.0                                                           |

**Table S17.** Energetic information of TSs for dehydration **9** → **10** + H<sub>2</sub>O in the absence of any surrogates or in the presence of C3, Bz, DME, or Ace at the M06-2X/6-31+G(2df,p) level of theory. The zero-point corrected energy, enthalpy, and Gibbs free energies are given relative to **9** in the absence of any surrogates or in the presence of C3, Bz, DME, or Ace, respectively.

| Index                     | $\Delta^\ddagger E^0$ at 0 K<br>(kcal mol <sup>-1</sup> ) | $\Delta^\ddagger H^0$ at 773.15 K<br>(kcal mol <sup>-1</sup> ) | $\Delta^\ddagger G^0$ at 773.15 K<br>(kcal mol <sup>-1</sup> ) |
|---------------------------|-----------------------------------------------------------|----------------------------------------------------------------|----------------------------------------------------------------|
| <b>TS9<sub>neat</sub></b> | 37.0                                                      | 35.7                                                           | 39.3                                                           |
| <b>TS9<sub>C3</sub></b>   | 35.8                                                      | 34.5                                                           | 39.3                                                           |
| <b>TS9<sub>Bz</sub></b>   | 37.5                                                      | 36.3                                                           | 38.8                                                           |
| <b>TS9<sub>DME</sub></b>  | 35.2                                                      | 34.1                                                           | 38.4                                                           |
| <b>TS9<sub>Ace</sub></b>  | 37.1                                                      | 36.3                                                           | 38.2                                                           |

**Table S18.** Energetic information of TSs for C–O cleavage **10** → **11** + **i5** in the absence of any surrogates or in the presence of C3, Bz, DME, or Ace at the M06-2X/6-31+G(2df,p) level of theory. The zero-point corrected energy, enthalpy, and Gibbs free energies are given relative to **10** in the absence of any surrogates or in the presence of C3, Bz, DME, or Ace, respectively.

| Index                      | $\Delta^\ddagger E^0$ at 0 K<br>(kcal mol <sup>-1</sup> ) | $\Delta^\ddagger H^0$ at 773.15 K<br>(kcal mol <sup>-1</sup> ) | $\Delta^\ddagger G^0$ at 773.15 K<br>(kcal mol <sup>-1</sup> ) |
|----------------------------|-----------------------------------------------------------|----------------------------------------------------------------|----------------------------------------------------------------|
| <b>TS10<sub>neat</sub></b> | 52.0                                                      | 52.6                                                           | 51.3                                                           |
| <b>TS10<sub>C3</sub></b>   | 52.7                                                      | 53.1                                                           | 51.3                                                           |
| <b>TS10<sub>Bz</sub></b>   | 48.0                                                      | 48.0                                                           | 47.6                                                           |
| <b>TS10<sub>DME</sub></b>  | 47.6                                                      | 47.1                                                           | 49.3                                                           |
| <b>TS10<sub>Ace</sub></b>  | 50.0                                                      | 49.7                                                           | 50.8                                                           |

## S6. Cartesian Coordinates of All Stationary Points

### In the Absence of Any Surrogates

The Cartesian coordinates for all stable structures in the absence of any surrogates reported in this work are listed below including computed absolute energies.

1 (Cellobiose) –  $E = -1297.616982$  Hartree

| Symbol | X          | Y          | Z          |
|--------|------------|------------|------------|
| C      | -4.2206250 | -0.0245010 | -0.1475430 |
| C      | -3.4261510 | 1.2782480  | -0.0968460 |
| C      | -2.0611800 | 1.0762320  | -0.7315460 |
| C      | -1.3954380 | -0.1538070 | -0.1282140 |
| C      | -2.3008200 | -1.3823480 | -0.1807520 |
| C      | -1.6909080 | -2.5725350 | 0.5400300  |
| O      | -5.4024410 | 0.1942470  | 0.5440400  |
| O      | -4.1078330 | 2.2853880  | -0.7975650 |
| O      | -1.2793760 | 2.2222990  | -0.5140360 |
| O      | -0.2091390 | -0.4263340 | -0.8595400 |
| O      | -3.5241830 | -1.0824940 | 0.4710390  |
| O      | -1.4152390 | -2.2730170 | 1.8917400  |
| H      | -4.4178480 | -0.2929290 | -1.2012180 |
| H      | -3.2881280 | 1.5455090  | 0.9621590  |
| H      | -2.2033600 | 0.9035800  | -1.8115850 |
| H      | -1.1522230 | 0.0623820  | 0.9201430  |
| H      | -2.4802930 | -1.6516790 | -1.2346820 |
| H      | -5.9743910 | -0.5726620 | 0.4463480  |
| H      | -4.9686690 | 2.3999690  | -0.3820960 |
| H      | -0.3533710 | 1.9677830  | -0.6172410 |

|   |            |            |            |
|---|------------|------------|------------|
| H | 2.4350720  | 3.1389490  | -0.6670070 |
| H | -2.2400970 | -1.9896600 | 2.3008890  |
| H | -2.3781430 | -3.4245070 | 0.4566960  |
| H | -0.7428160 | -2.8396540 | 0.0650960  |
| C | 0.9503910  | -0.4731160 | -0.1173580 |
| C | 2.0051680  | -1.2521130 | -0.8882840 |
| C | 3.3367850  | -1.1517070 | -0.1600270 |
| C | 3.7038290  | 0.3013000  | 0.0795220  |
| C | 2.5663460  | 0.9744500  | 0.8524050  |
| C | 2.8142380  | 2.4499120  | 1.1099850  |
| O | 1.5793720  | -2.5877960 | -0.9799760 |
| O | 4.2917460  | -1.8215840 | -0.9502130 |
| O | 4.9193880  | 0.3124450  | 0.8010080  |
| O | 1.3791740  | 0.8659960  | 0.0823750  |
| O | 3.1811770  | 3.1471840  | -0.0593360 |
| H | 0.7739080  | -0.9478930 | 0.8645940  |
| H | 2.1028540  | -0.7962770 | -1.8851220 |
| H | 2.3245990  | -3.1064220 | -1.3031130 |
| H | 3.2380130  | -1.6518720 | 0.8181640  |
| H | 5.1495550  | -1.7151280 | -0.5249230 |
| H | 3.8197780  | 0.8060910  | -0.8876630 |
| H | 2.4359490  | 0.4650410  | 1.8216060  |
| H | 1.9180440  | 2.8823470  | 1.5726560  |
| H | 3.6443550  | 2.5564920  | 1.8135310  |
| H | 5.3662450  | 1.1497730  | 0.6482500  |

$TS1_{\text{neat}} - E = -1297.537918$  Hartree

| Symbol | X          | Y          | Z          |
|--------|------------|------------|------------|
| C      | 4.1848290  | 0.1847180  | 0.1169190  |
| C      | 3.4004240  | -1.1063900 | 0.3301260  |
| C      | 2.2108980  | -1.1674430 | -0.6150670 |
| C      | 1.4196260  | 0.1396620  | -0.5282150 |
| C      | 2.3318220  | 1.3457000  | -0.7282060 |
| C      | 1.5935480  | 2.6610410  | -0.5648300 |
| O      | 5.1657450  | 0.2326900  | 1.0971450  |
| O      | 4.2321540  | -2.2134920 | 0.0950360  |
| O      | 1.4226850  | -2.2703540 | -0.2468680 |
| O      | 0.4028010  | 0.2098060  | -1.4930160 |
| O      | 3.3636290  | 1.3240530  | 0.2444080  |
| O      | 0.9361750  | 2.7435630  | 0.6865100  |
| H      | 4.6313150  | 0.1787810  | -0.8937800 |
| H      | 3.0236420  | -1.1001910 | 1.3648260  |
| H      | 2.5857010  | -1.2812510 | -1.6462550 |
| H      | 1.0012510  | 0.1946260  | 0.4927330  |
| H      | 2.7609340  | 1.3071790  | -1.7434690 |
| H      | 5.7508450  | 0.9758230  | 0.9239170  |
| H      | 4.9712110  | -2.1597170 | 0.7093950  |
| H      | 0.5705680  | -2.2275760 | -0.7087680 |
| H      | -0.2517910 | -0.5032540 | -1.2808670 |
| H      | 1.5934320  | 2.5761050  | 1.3713020  |
| H      | 2.3036660  | 3.4885540  | -0.6857240 |
| H      | 0.8244190  | 2.7393960  | -1.3362170 |

|   |            |            |            |
|---|------------|------------|------------|
| C | -1.6900720 | 0.8645940  | 0.2037070  |
| C | -2.8347740 | 0.9411520  | -0.7741330 |
| C | -3.8754750 | -0.1925800 | -0.6673530 |
| C | -3.8996390 | -0.6793750 | 0.7907210  |
| C | -2.5079790 | -1.0053040 | 1.3225510  |
| C | -1.6863810 | -2.0485730 | 0.5154390  |
| O | -3.3637710 | 2.2205370  | -0.4699810 |
| O | -3.6815480 | -1.2141050 | -1.5789650 |
| O | -4.4584590 | 0.4014770  | 1.5295650  |
| O | -1.6821920 | 0.1902530  | 1.2654750  |
| O | -1.3462740 | -1.5466430 | -0.7067400 |
| H | -0.9050650 | 1.6225750  | 0.1615620  |
| H | -2.4260410 | 0.9738860  | -1.7862850 |
| H | -3.9229670 | 2.1269460  | 0.3139590  |
| H | -4.8499460 | 0.2662560  | -0.8661940 |
| H | -2.7251540 | -1.4979670 | -1.4583990 |
| H | -4.5182030 | -1.5819540 | 0.8522620  |
| H | -2.5417120 | -1.2568440 | 2.3855460  |
| H | -0.8084550 | -2.3090700 | 1.1289650  |
| H | -2.3279540 | -2.9464620 | 0.4528390  |
| H | -4.5482160 | 0.1686620  | 2.4581460  |

ii (Glucose) –  $E = -687.009485$  Hartree

| Symbol | X          | Y          | Z          |
|--------|------------|------------|------------|
| C      | -0.9481460 | -1.2693620 | -0.4072300 |
| C      | -1.5317590 | -0.0589770 | 0.3077600  |

|   |            |            |            |
|---|------------|------------|------------|
| C | -0.8040530 | 1.1853530  | -0.1620490 |
| C | 0.6918480  | 1.0293550  | 0.0519530  |
| C | 1.1833290  | -0.2549590 | -0.6155260 |
| C | 2.6357960  | -0.5595300 | -0.2863490 |
| O | -1.5828000 | -2.3939260 | 0.0975480  |
| O | -2.8980660 | 0.1125990  | 0.0124880  |
| O | -1.2182860 | 2.3368130  | 0.5372410  |
| O | 1.3965460  | 2.1023210  | -0.5256410 |
| O | 0.4313660  | -1.3688560 | -0.1499200 |
| O | 2.8152450  | -0.7950730 | 1.0896990  |
| H | -1.1096330 | -1.1737410 | -1.4963440 |
| H | -1.3703120 | -0.1967170 | 1.3872440  |
| H | -0.9903670 | 1.3112790  | -1.2418240 |
| H | 0.8926640  | 0.9627600  | 1.1311630  |
| H | 1.0720320  | -0.1480040 | -1.7070890 |
| H | -1.2867170 | -3.1709700 | -0.3859730 |
| H | -3.3708830 | -0.6753480 | 0.2995500  |
| H | -2.1761210 | 2.4033230  | 0.4612350  |
| H | 1.0166220  | 2.9178650  | -0.1816590 |
| H | 2.1998020  | -1.4903610 | 1.3458190  |
| H | 2.9582300  | -1.4248960 | -0.8813460 |
| H | 3.2505450  | 0.3025020  | -0.5534390 |

**2** (Cellobiosan) –  $E = -1221.195932$  Hartree

| Symbol | X         | Y          | Z         |
|--------|-----------|------------|-----------|
| C      | 3.7952660 | -0.1999340 | 0.8679930 |



|   |            |            |            |
|---|------------|------------|------------|
| C | 2.7812680  | 0.9175670  | 1.1477900  |
| C | 1.9352100  | 1.1650320  | -0.1157130 |
| C | 1.5211930  | -0.1788790 | -0.7621570 |
| C | 2.6712590  | -1.1878650 | -0.7569420 |
| C | 3.9630860  | -0.6578250 | -1.3783100 |
| O | 1.9912510  | 0.5673980  | 2.2540120  |
| O | 2.6004660  | 1.9821630  | -1.0554590 |
| O | 3.0913330  | -1.3836260 | 0.5901310  |
| O | 4.5390600  | 0.0981630  | -0.3100830 |
| H | 4.4674780  | -0.3778580 | 1.7093040  |
| H | 3.3053830  | 1.8435670  | 1.4044770  |
| H | 1.5065720  | -0.2358470 | 2.0245170  |
| H | 1.0210050  | 1.6830080  | 0.1813690  |
| H | 3.5496030  | 1.8384110  | -0.9710920 |
| H | 1.1826880  | 0.0187770  | -1.7876480 |
| H | 2.3467170  | -2.1485810 | -1.1592840 |
| H | 4.6331070  | -1.4799340 | -1.6444110 |
| H | 3.8018750  | -0.0109090 | -2.2434540 |
| O | 0.4784100  | -0.7851500 | -0.0037570 |
| C | -0.8107330 | -0.5827130 | -0.4676590 |
| C | -1.7302250 | -1.5183050 | 0.3056930  |
| O | -1.1802950 | 0.7542650  | -0.2499890 |
| H | -0.8653320 | -0.8087050 | -1.5499910 |
| C | -3.1586920 | -1.2754880 | -0.1432480 |
| O | -1.4294610 | -2.8702540 | 0.0528660  |
| H | -1.6360490 | -1.2794220 | 1.3753750  |

|   |            |            |            |
|---|------------|------------|------------|
| C | -2.4951010 | 1.0695560  | -0.6939720 |
| C | -3.5188090 | 0.1913230  | 0.0246650  |
| O | -4.0829360 | -2.0297230 | 0.6059970  |
| H | -3.2363460 | -1.5342020 | -1.2126280 |
| H | -0.5387730 | -3.0481240 | 0.3717560  |
| C | -2.6937680 | 2.5482980  | -0.4021860 |
| H | -2.5810910 | 0.8971440  | -1.7792340 |
| O | -4.7784630 | 0.4663960  | -0.5389290 |
| H | -3.5031930 | 0.4411290  | 1.0955060  |
| H | -3.8281130 | -2.9568670 | 0.5511000  |
| O | -2.5314880 | 2.8337590  | 0.9661590  |
| H | -1.9886780 | 3.1255480  | -1.0154300 |
| H | -3.7130510 | 2.8301140  | -0.6742170 |
| H | -1.6541270 | 2.5352230  | 1.2285340  |
| H | -5.4124010 | -0.1442120 | -0.1478390 |

**TS2<sub>neat</sub>** –  $E = -1221.109694$  Hartree

| Symbol | X         | Y          | Z          |
|--------|-----------|------------|------------|
| C      | 4.3442450 | 0.1936680  | 0.4576530  |
| C      | 3.5964670 | 1.0578610  | -0.5676440 |
| C      | 2.3772570 | 0.2779440  | -1.0958770 |
| C      | 1.6395040 | -0.4152680 | 0.0771760  |
| C      | 2.6220560 | -1.0363650 | 1.0730980  |
| C      | 3.6261630 | -1.9893720 | 0.4236380  |
| O      | 3.2270830 | 2.2704120  | 0.0323230  |
| O      | 2.7240950 | -0.6421610 | -2.1123250 |

|   |            |            |            |
|---|------------|------------|------------|
| O | 3.5025830  | -0.0285030 | 1.5561800  |
| O | 4.6176540  | -1.0965410 | -0.0909760 |
| H | 5.2671810  | 0.6606230  | 0.8064770  |
| H | 4.2546360  | 1.2951590  | -1.4098990 |
| H | 2.5861980  | 2.0636740  | 0.7272440  |
| H | 1.6833070  | 1.0012300  | -1.5383270 |
| H | 3.6095500  | -0.9752410 | -1.9285780 |
| H | 1.0164320  | -1.2191010 | -0.3559520 |
| H | 2.0928550  | -1.4619330 | 1.9279390  |
| H | 4.0825110  | -2.6498540 | 1.1665730  |
| H | 3.2039150  | -2.5800390 | -0.3931010 |
| O | 0.8663400  | 0.5232300  | 0.7816960  |
| H | 0.2386690  | 0.9618630  | 0.0991130  |
| O | -0.8492250 | 1.3721860  | -0.8308820 |
| C | -1.2993000 | 0.5148850  | -1.7878730 |
| C | -2.3010760 | -0.5080220 | -1.1879460 |
| H | -0.4912600 | -0.0749370 | -2.2569170 |
| H | -1.8449830 | 1.0195390  | -2.6063250 |
| C | -3.6210490 | 0.0548160  | -0.6653080 |
| O | -1.5810210 | -1.1023970 | -0.0628510 |
| H | -2.4604660 | -1.3463210 | -1.8675370 |
| C | -3.4169330 | 1.1670280  | 0.3775710  |
| O | -4.3566530 | -0.9479900 | 0.0173620  |
| H | -4.1894650 | 0.4536730  | -1.5164710 |
| C | -1.5008140 | -0.4486730 | 1.0071540  |
| C | -2.4539670 | 0.6275530  | 1.4615600  |

|   |            |            |            |
|---|------------|------------|------------|
| O | -3.0308240 | 2.3744000  | -0.1671110 |
| H | -4.3815070 | 1.3076070  | 0.8775190  |
| C | -4.8092940 | -2.0252520 | -0.7749860 |
| H | -0.8431710 | -0.8848760 | 1.7541760  |
| O | -3.1244800 | -0.0422440 | 2.5164400  |
| H | -1.8765530 | 1.4512200  | 1.8869900  |
| H | -2.0816770 | 2.2264230  | -0.4794940 |
| H | -4.0018420 | -2.7295530 | -1.0082360 |
| H | -5.2521920 | -1.6597590 | -1.7100410 |
| H | -5.5738180 | -2.5478530 | -0.1990700 |
| H | -3.8222890 | -0.5794950 | 2.1157890  |

**3** (Levoglucosan) –  $E = -610.585923$  Hartree

| Symbol | X          | Y          | Z          |
|--------|------------|------------|------------|
| C      | 0.6421680  | -1.0477640 | -0.7620070 |
| C      | -0.5959510 | -1.2855400 | 0.1142760  |
| C      | -0.7522390 | -0.1043570 | 1.0921370  |
| C      | -0.5239750 | 1.2393110  | 0.3596040  |
| C      | 0.6489390  | 1.1556150  | -0.6189240 |
| C      | 1.9438590  | 0.6720300  | 0.0324960  |
| O      | -1.7229630 | -1.4418710 | -0.7072240 |
| O      | 0.0860540  | -0.2245810 | 2.2203240  |
| O      | -1.6488040 | 1.5747850  | -0.4324750 |
| O      | 0.4148780  | 0.0957740  | -1.5417270 |
| O      | 1.7732130  | -0.7490580 | 0.0521240  |
| H      | 0.8584690  | -1.8904500 | -1.4213790 |

|   |            |            |            |
|---|------------|------------|------------|
| H | -0.4812880 | -2.2074750 | 0.6929900  |
| H | -1.7943040 | -0.6452720 | -1.2511250 |
| H | -1.7846460 | -0.1176080 | 1.4619690  |
| H | 0.8966550  | -0.6707610 | 1.9498560  |
| H | -0.3155720 | 2.0124160  | 1.1121090  |
| H | 0.7470010  | 2.0841490  | -1.1819610 |
| H | 2.8115780  | 0.9250890  | -0.5827110 |
| H | 2.0872710  | 1.0384060  | 1.0515820  |
| H | -2.4209980 | 1.6553430  | 0.1350020  |

**TS3<sub>neat</sub>** –  $E = -1297.536699$  Hartree

| Symbol | X          | Y          | Z          |
|--------|------------|------------|------------|
| O      | -4.1408710 | 0.7234470  | -1.4264780 |
| H      | -4.6988520 | 0.1537530  | 0.1565830  |
| C      | -2.8138100 | 0.7081020  | -1.4822880 |
| C      | -1.9594570 | 1.5006120  | -0.4892990 |
| C      | -1.6632070 | 0.8360560  | 0.8817650  |
| C      | -1.4380860 | -0.6815220 | 0.7482960  |
| C      | -2.5705990 | -1.4392610 | 0.0560800  |
| C      | -3.9152450 | -1.5386130 | 0.7831330  |
| O      | -0.7604210 | 1.8833760  | -1.1333790 |
| O      | -2.5713740 | 1.1446440  | 1.8953570  |
| O      | -0.3001230 | -0.9772120 | -0.0623780 |
| O      | -2.7324250 | -0.9203050 | -1.2794380 |
| O      | -4.5979870 | -0.3298340 | 1.0069610  |
| H      | -2.3682060 | 0.7673710  | -2.4828950 |

|   |            |            |            |
|---|------------|------------|------------|
| H | -2.5234660 | 2.4170120  | -0.2883620 |
| H | -0.1178090 | 1.1675670  | -1.0386830 |
| H | -0.7155660 | 1.2753060  | 1.1962360  |
| H | -3.4339920 | 0.7288300  | 1.7142000  |
| H | -1.3024930 | -1.0985440 | 1.7560400  |
| H | -2.2177560 | -2.4690660 | -0.0752050 |
| H | -4.5444450 | -2.2295310 | 0.2040070  |
| H | -3.7376940 | -1.9969910 | 1.7612010  |
| H | -3.8133980 | -0.5690140 | -1.4765780 |
| H | 1.3106300  | 2.8192840  | -0.8159810 |
| C | 0.9650800  | -0.7777310 | 0.4776080  |
| C | 1.9423360  | -1.5962800 | -0.3589580 |
| C | 3.3659590  | -1.2644000 | 0.0498730  |
| C | 3.6134190  | 0.2319400  | -0.0662440 |
| C | 2.5747310  | 0.9811380  | 0.7620770  |
| C | 2.6283520  | 2.4929640  | 0.5772560  |
| O | 1.7559980  | -2.9794550 | -0.1725550 |
| O | 4.3066640  | -1.9173920 | -0.7695640 |
| O | 4.8819040  | 0.5697650  | 0.4374580  |
| O | 1.2693750  | 0.5879270  | 0.3628880  |
| O | 2.2698960  | 2.8761000  | -0.7262790 |
| H | 0.9947080  | -1.0920270 | 1.5368910  |
| H | 1.7950830  | -1.3122740 | -1.4113610 |
| H | 0.9133230  | -3.2300180 | -0.5628850 |
| H | 3.5093010  | -1.5595680 | 1.1030720  |
| H | 4.1232200  | -2.8625390 | -0.7437450 |

|   |           |           |            |
|---|-----------|-----------|------------|
| H | 3.5096900 | 0.5347650 | -1.1188760 |
| H | 2.7352590 | 0.7405670 | 1.8256550  |
| H | 1.9747970 | 2.9620540 | 1.3243110  |
| H | 3.6538910 | 2.8269000 | 0.7527020  |
| H | 5.5318420 | 0.0196510 | -0.0128800 |

4 – E = -1297.593372 Hartree

| Symbol | X          | Y          | Z          |
|--------|------------|------------|------------|
| O      | -4.2769530 | 1.4955880  | -0.7294700 |
| H      | -4.7678800 | -0.3978450 | -0.0514930 |
| C      | -3.1740380 | 1.4728460  | -1.2114130 |
| C      | -1.8877330 | 1.6536530  | -0.4190750 |
| C      | -1.6933770 | 0.7496520  | 0.8290020  |
| C      | -1.4149870 | -0.7612590 | 0.6096790  |
| C      | -2.4700030 | -1.6417690 | -0.0654390 |
| C      | -3.7634250 | -1.9014240 | 0.7057500  |
| O      | -0.7837440 | 1.6448140  | -1.2936100 |
| O      | -2.6920460 | 0.9427630  | 1.7841540  |
| O      | -0.2391310 | -0.9797050 | -0.1768350 |
| O      | -2.7438260 | -1.0815040 | -1.3390450 |
| O      | -4.6105930 | -0.7876420 | 0.8193520  |
| H      | -3.0144530 | 1.3811240  | -2.3037940 |
| H      | -1.9612820 | 2.6689280  | -0.0068280 |
| H      | -0.4704480 | 0.7357260  | -1.3807830 |
| H      | -0.7729120 | 1.1288360  | 1.2792740  |
| H      | -3.5412300 | 0.6032540  | 1.4578230  |

|   |            |            |            |
|---|------------|------------|------------|
| H | -1.2521170 | -1.1704360 | 1.6181240  |
| H | -1.9761790 | -2.6179560 | -0.1829330 |
| H | -4.2880640 | -2.7293090 | 0.2053760  |
| H | -3.5251930 | -2.2281100 | 1.7228680  |
| H | -3.0787160 | -1.7558360 | -1.9360430 |
| H | 1.2424990  | 2.5148650  | -0.8390750 |
| C | 1.0007240  | -0.7855550 | 0.4282370  |
| C | 2.0248250  | -1.5346980 | -0.4171150 |
| C | 3.4239570  | -1.1949280 | 0.0584210  |
| C | 3.6356490  | 0.3087290  | -0.0021820 |
| C | 2.5608790  | 1.0128240  | 0.8205090  |
| C | 2.5428380  | 2.5222480  | 0.6026470  |
| O | 1.8615680  | -2.9301520 | -0.3126350 |
| O | 4.4085420  | -1.7987820 | -0.7480740 |
| O | 4.8823760  | 0.6636410  | 0.5441360  |
| O | 1.2676660  | 0.5861870  | 0.4220800  |
| O | 2.1424270  | 2.8460070  | -0.7032700 |
| H | 0.9913120  | -1.1794910 | 1.4617020  |
| H | 1.9091080  | -1.1979200 | -1.4581310 |
| H | 1.0209220  | -3.1682130 | -0.7148620 |
| H | 3.5351960  | -1.5241720 | 1.1052990  |
| H | 4.2385020  | -2.7464500 | -0.7705160 |
| H | 3.5523480  | 0.6401830  | -1.0479470 |
| H | 2.7332320  | 0.7891020  | 1.8855720  |
| H | 1.8746440  | 2.9743990  | 1.3489680  |
| H | 3.5506470  | 2.9169890  | 0.7511460  |



H 5.5579110 0.1507050 0.0878690

**TS4<sub>neat</sub>** - E = -1297.530616 Hartree

| Symbol | X          | Y          | Z          |
|--------|------------|------------|------------|
| C      | 3.5495190  | 2.0713670  | 1.3344380  |
| C      | 3.1296060  | 0.7555890  | 1.3788280  |
| C      | 2.0915180  | 0.9877230  | -0.3826590 |
| C      | 1.4679320  | -0.4131500 | -0.4859710 |
| C      | 2.3465060  | -1.6537270 | -0.3142440 |
| C      | 1.5943280  | -2.9017140 | -0.7754800 |
| O      | 4.2748640  | 2.5201630  | 0.3691340  |
| O      | 2.3364980  | 0.3511310  | 2.4316730  |
| O      | 2.9423340  | 1.3661200  | -1.2365590 |
| O      | 0.4329500  | -0.5238220 | 0.4867110  |
| O      | 3.5116270  | -1.4791980 | -1.0930930 |
| O      | 1.2343590  | -2.8135630 | -2.1321410 |
| H      | 3.1515360  | 2.7898010  | 2.0576310  |
| H      | 3.7630600  | 0.0060480  | 0.9094900  |
| H      | 1.3317750  | 1.6973280  | -0.0102070 |
| H      | 1.0330710  | -0.4333430 | -1.4947780 |
| H      | 2.5851310  | -1.7603670 | 0.7546130  |
| H      | 4.1437270  | -2.1705320 | -0.8737380 |
| H      | 1.4751050  | 0.0768200  | 2.0910020  |
| H      | 3.8646750  | 2.0431310  | -0.5324910 |
| H      | -1.5497230 | 3.0747160  | -0.1247370 |
| H      | 2.0191680  | -2.5477370 | -2.6262710 |

|   |            |            |            |
|---|------------|------------|------------|
| H | 2.2302130  | -3.7811810 | -0.5894890 |
| H | 0.6710520  | -3.0302770 | -0.2019350 |
| C | -0.8618200 | -0.5332400 | -0.0216570 |
| C | -1.8088190 | -0.9403210 | 1.0978020  |
| C | -3.2307600 | -0.8820460 | 0.5685860  |
| C | -3.5243730 | 0.4933490  | -0.0090210 |
| C | -2.4692900 | 0.8603370  | -1.0517360 |
| C | -2.6075960 | 2.2930540  | -1.5394630 |
| O | -1.5727550 | -2.2622960 | 1.5263130  |
| O | -4.1787190 | -1.1293880 | 1.5801590  |
| O | -4.7754800 | 0.5097360  | -0.6509200 |
| O | -1.1686210 | 0.7559610  | -0.4796370 |
| O | -2.4273320 | 3.2175140  | -0.4933630 |
| H | -0.9275260 | -1.2541950 | -0.8578200 |
| H | -1.6970170 | -0.2234800 | 1.9245440  |
| H | -0.7299200 | -2.2952440 | 1.9884300  |
| H | -3.3308650 | -1.6274210 | -0.2378560 |
| H | -3.9893780 | -1.9908100 | 1.9667200  |
| H | -3.4867050 | 1.2357500  | 0.8016680  |
| H | -2.5618520 | 0.1734980  | -1.9083540 |
| H | -1.8846900 | 2.4619570  | -2.3484980 |
| H | -3.6167790 | 2.4375880  | -1.9303490 |
| H | -5.4323630 | 0.1957590  | -0.0203170 |

$\mathbf{5} - E = -1068.585388$  Hartree

| Symbol | X | Y | Z |
|--------|---|---|---|
|--------|---|---|---|

|   |            |            |            |
|---|------------|------------|------------|
| C | -1.9720900 | 1.8952110  | -0.6687750 |
| C | -2.0496410 | 0.4932430  | -0.0751940 |
| C | -3.4342180 | -0.1204380 | -0.3113490 |
| C | -3.5624760 | -1.4734990 | 0.3809170  |
| O | -1.2622540 | 2.1913480  | -1.5869950 |
| O | -1.1016130 | -0.3674280 | -0.6464280 |
| O | -4.3728950 | 0.7911550  | 0.2417350  |
| O | -3.3860780 | -1.3514600 | 1.7704770  |
| H | -2.6416740 | 2.6341800  | -0.1893250 |
| H | -1.9041160 | 0.5821920  | 1.0123580  |
| H | -3.5813630 | -0.2394490 | -1.3937130 |
| H | -5.2413770 | 0.6268420  | -0.1353310 |
| H | 1.4679850  | 2.6677740  | -0.7990840 |
| H | -3.9891000 | -0.6663990 | 2.0807740  |
| H | -4.5483610 | -1.9006840 | 0.1406770  |
| H | -2.7940480 | -2.1587010 | 0.0155100  |
| C | 0.0813120  | -0.4831800 | 0.0747790  |
| C | 1.0153610  | -1.3856140 | -0.7174400 |
| C | 2.3488510  | -1.4522290 | 0.0020190  |
| C | 2.9078090  | -0.0515570 | 0.1885470  |
| C | 1.8851120  | 0.8308190  | 0.9030830  |
| C | 2.2904860  | 2.2976300  | 0.9116350  |
| O | 0.5181430  | -2.7009350 | -0.8154890 |
| O | 3.3000060  | -2.1988980 | -0.7214400 |
| O | 4.0698520  | -0.0754290 | 0.9825880  |
| O | 0.6393590  | 0.7931340  | 0.2214710  |

|   |            |            |            |
|---|------------|------------|------------|
| O | 2.3279360  | 2.8264710  | -0.3902570 |
| H | -0.1263640 | -0.9176700 | 1.0722400  |
| H | 1.1544170  | -0.9348380 | -1.7102870 |
| H | -0.2753960 | -2.6858150 | -1.3587690 |
| H | 2.1901890  | -1.9023540 | 0.9963570  |
| H | 2.9205110  | -3.0645380 | -0.9065250 |
| H | 3.1147370  | 0.3829720  | -0.8003260 |
| H | 1.7698850  | 0.4695160  | 1.9379510  |
| H | 1.5857730  | 2.8528670  | 1.5462820  |
| H | 3.2933390  | 2.3898940  | 1.3343070  |
| H | 4.6822730  | -0.7017750 | 0.5822760  |

**i3** (Ethene-diol) –  $E = -228.956313$  Hartree

| Symbol | X          | Y          | Z          |
|--------|------------|------------|------------|
| C      | 0.5460320  | -0.3744770 | 0.0313210  |
| C      | -0.5460320 | 0.3744780  | -0.0313190 |
| O      | 1.7902040  | 0.2001450  | 0.0522840  |
| O      | -1.7902040 | -0.2001450 | -0.0522860 |
| H      | 0.4859860  | -1.4563500 | 0.1079010  |
| H      | -0.4859860 | 1.4563500  | -0.1079000 |
| H      | -2.4200960 | 0.3850160  | 0.3734790  |
| H      | 2.4200950  | -0.3850160 | -0.3734830 |

**TS5<sub>neat</sub>** –  $E = -1068.529286$  Hartree

| Symbol | X         | Y         | Z          |
|--------|-----------|-----------|------------|
| O      | 4.5814190 | 0.4948490 | -0.5763810 |

|   |            |            |            |
|---|------------|------------|------------|
| O | 2.6619160  | -2.3417760 | 0.5301330  |
| C | 3.7439750  | -0.1854200 | 0.0924170  |
| C | 3.3360160  | -1.5643740 | -0.4326810 |
| H | 4.1489530  | 1.7511140  | -0.4764460 |
| H | 3.2751130  | -2.6266370 | 1.2124210  |
| H | 3.7722920  | -0.1537230 | 1.1971470  |
| H | 4.2663900  | -2.0480660 | -0.7572880 |
| H | 2.6821510  | -1.4924250 | -1.3042720 |
| C | 2.4658850  | 1.9403030  | 0.3866400  |
| C | 1.9633340  | 0.7860860  | -0.1846100 |
| O | 3.4767070  | 2.5550790  | -0.1207080 |
| O | 0.9949280  | 0.0712780  | 0.4750420  |
| H | 2.1124170  | 2.2495280  | 1.3746870  |
| H | 2.0315410  | 0.6417380  | -1.2602600 |
| H | -2.0990140 | 2.5267960  | 1.4487530  |
| C | -0.2158300 | -0.0814190 | -0.1959080 |
| C | -0.8978950 | -1.3145560 | 0.3778130  |
| C | -2.2755040 | -1.4384330 | -0.2454360 |
| C | -3.0641370 | -0.1557130 | -0.0492580 |
| C | -2.2680590 | 1.0291460  | -0.5958510 |
| C | -2.9251530 | 2.3644030  | -0.2868990 |
| O | -0.1864070 | -2.4830520 | 0.0670830  |
| O | -3.0171690 | -2.4929960 | 0.3227140  |
| O | -4.2834920 | -0.2030610 | -0.7506610 |
| O | -0.9793800 | 1.0747560  | 0.0081650  |
| O | -2.9934800 | 2.5984690  | 1.0994660  |

|   |            |            |            |
|---|------------|------------|------------|
| H | -0.0332370 | -0.2270730 | -1.2777090 |
| H | -0.9963260 | -1.1724200 | 1.4646940  |
| H | 0.7112030  | -2.4303990 | 0.4303510  |
| H | -2.1499170 | -1.6064370 | -1.3285960 |
| H | -2.4851110 | -3.2938970 | 0.2618260  |
| H | -3.2345170 | 0.0014810  | 1.0258600  |
| H | -2.1720910 | 0.9150160  | -1.6879720 |
| H | -2.3642320 | 3.1597430  | -0.7960170 |
| H | -3.9486440 | 2.3532850  | -0.6670990 |
| H | -4.7331020 | -1.0161340 | -0.4962720 |

**6** (Glycolaldehyde) –  $E = -228.976128$  Hartree

| Symbol | X          | Y          | Z          |
|--------|------------|------------|------------|
| C      | -0.6695370 | 0.6459430  | 0.0001670  |
| H      | -0.9406080 | 1.2450780  | -0.8826340 |
| C      | 0.8279400  | 0.4840750  | -0.0002310 |
| H      | 1.4275380  | 1.4143710  | -0.0005320 |
| O      | -1.3302810 | -0.5780740 | -0.0000280 |
| H      | -0.9399380 | 1.2446560  | 0.8835040  |
| O      | 1.3496440  | -0.5989540 | -0.0000710 |
| H      | -0.6523170 | -1.2679900 | 0.0008330  |

**i4** –  $E = -839.569632$  Hartree

| Symbol | X         | Y         | Z          |
|--------|-----------|-----------|------------|
| C      | 4.0479330 | 0.8740900 | -0.3137600 |
| C      | 2.7334230 | 1.0521470 | -0.2566530 |

|   |            |            |            |
|---|------------|------------|------------|
| O | 4.6423290  | -0.2471710 | 0.1759630  |
| O | 1.9248280  | 0.1231760  | 0.3428870  |
| H | 4.6813200  | 1.6413630  | -0.7433740 |
| H | 2.2598330  | 1.9527380  | -0.6276220 |
| H | -1.2295600 | 2.4645710  | 1.4730540  |
| C | 0.6859250  | -0.0573420 | -0.2586970 |
| C | 0.0646460  | -1.2979710 | 0.3646500  |
| C | -1.3232550 | -1.4878770 | -0.2148490 |
| C | -2.1522820 | -0.2316510 | -0.0057660 |
| C | -1.4152940 | 0.9824030  | -0.5721560 |
| C | -2.1101470 | 2.2916230  | -0.2347590 |
| O | 0.8133990  | -2.4529400 | 0.0735120  |
| O | -2.0100720 | -2.5589210 | 0.3917010  |
| O | -3.3865920 | -0.3264820 | -0.6759480 |
| O | -0.1118770 | 1.0719680  | -0.0091520 |
| O | -2.1366470 | 2.5202350  | 1.1537100  |
| H | 0.8072030  | -0.1935060 | -1.3489560 |
| H | -0.0066550 | -1.1293820 | 1.4494380  |
| H | 1.7121760  | -2.3182450 | 0.3947330  |
| H | -1.2266900 | -1.6662400 | -1.2989310 |
| H | -1.4562930 | -3.3441750 | 0.3250260  |
| H | -2.3016730 | -0.0788860 | 1.0730750  |
| H | -1.3512530 | 0.8753360  | -1.6673640 |
| H | -1.5972590 | 3.1084440  | -0.7608340 |
| H | -3.1455560 | 2.2446140  | -0.5784090 |
| H | -3.8043400 | -1.1490670 | -0.3990710 |

|   |           |            |           |
|---|-----------|------------|-----------|
| H | 5.5901230 | -0.1990130 | 0.0397940 |
|---|-----------|------------|-----------|

**TS6<sub>neat</sub>** –  $E = -1297.537889$  Hartree

| Symbol | X          | Y          | Z          |
|--------|------------|------------|------------|
| O      | -3.4299480 | -3.0438970 | -0.7352250 |
| H      | -4.6604030 | 1.4387670  | -1.5219510 |
| C      | -3.8280150 | -2.0676320 | -0.1599750 |
| C      | -3.1187800 | -0.7658170 | -0.1982140 |
| C      | -1.9669890 | -0.4587190 | -0.7903500 |
| C      | -1.6376610 | 0.9728920  | -0.4646040 |
| C      | -2.8622990 | 1.4044110  | 0.3726630  |
| C      | -3.6700370 | 2.5222080  | -0.2576700 |
| O      | -0.4830990 | 1.1206690  | 0.3548760  |
| O      | -3.7152530 | 0.2488910  | 0.4895300  |
| O      | -4.0669240 | 2.1951180  | -1.5676870 |
| H      | -4.7531090 | -2.0790310 | 0.4474740  |
| H      | -1.3634130 | -1.1274620 | -1.3822150 |
| H      | -1.5202340 | 1.5942830  | -1.3632290 |
| H      | -2.5305120 | 1.6815400  | 1.3787920  |
| H      | -4.5338840 | 2.7533000  | 0.3787240  |
| H      | -3.0453970 | 3.4182000  | -0.3272600 |
| H      | 1.1539160  | -2.4072170 | -0.7748840 |
| C      | 0.7326190  | 1.1562960  | -0.3085430 |
| C      | 1.7991010  | 1.3810320  | 0.7560840  |
| C      | 3.1714900  | 1.3027950  | 0.1189820  |
| C      | 3.3294390  | -0.0283480 | -0.5945030 |



|   |            |            |            |
|---|------------|------------|------------|
| C | 2.1968500  | -0.2171370 | -1.6019130 |
| C | 2.1916750  | -1.6134450 | -2.2054700 |
| O | 1.6769170  | 2.6491030  | 1.3556940  |
| O | 4.2003220  | 1.3979440  | 1.0768520  |
| O | 4.5403710  | -0.0781420 | -1.3085760 |
| O | 0.9357460  | -0.0722230 | -0.9614580 |
| O | 1.9847990  | -2.6010270 | -1.2240030 |
| H | 0.7455140  | 1.9757370  | -1.0532240 |
| H | 1.6965880  | 0.5756880  | 1.4997190  |
| H | 0.8290950  | 2.6889820  | 1.8092990  |
| H | 3.2656890  | 2.1141520  | -0.6221060 |
| H | 4.0636240  | 2.2049840  | 1.5844100  |
| H | 3.2743790  | -0.8381760 | 0.1490230  |
| H | 2.3072510  | 0.5305740  | -2.4039310 |
| H | 1.4181400  | -1.6589080 | -2.9843510 |
| H | 3.1643280  | -1.8078770 | -2.6618870 |
| H | 5.2497980  | 0.1383880  | -0.6940560 |
| C | 1.3117500  | -2.4063610 | 2.3721160  |
| C | -0.0284130 | -1.9559380 | 1.7936270  |
| H | 1.8928410  | -2.9832700 | 1.6467460  |
| H | 1.9178170  | -1.5436500 | 2.6732610  |
| H | 1.1660330  | -3.0282200 | 3.2612570  |
| C | -0.8354930 | -1.1107730 | 2.7757610  |
| H | 0.1409280  | -1.3653860 | 0.8870100  |
| H | -0.6155680 | -2.8324780 | 1.4934970  |
| H | -1.7878690 | -0.7884740 | 2.3419690  |

|   |            |            |           |
|---|------------|------------|-----------|
| H | -1.0510380 | -1.6695840 | 3.6922960 |
| H | -0.2793970 | -0.2091310 | 3.0576490 |

7 - E = -1297.60673 Hartree

| Symbol | X          | Y          | Z          |
|--------|------------|------------|------------|
| O      | 3.6977940  | 0.5027030  | 2.4265730  |
| H      | 3.8181440  | -0.5274960 | -1.5025480 |
| C      | 2.7328370  | 0.9919000  | 1.6016890  |
| C      | 2.0711740  | 0.2626200  | 0.7109540  |
| C      | 0.9911800  | 0.6941310  | -0.2503690 |
| C      | 0.4076520  | -0.6739900 | -0.6749510 |
| C      | 1.5558520  | -1.6617510 | -0.4393820 |
| C      | 2.4527550  | -1.9060390 | -1.6462640 |
| O      | 1.4311750  | 1.4656780  | -1.3396590 |
| O      | -0.6661290 | -1.0679920 | 0.1640270  |
| O      | 2.3350150  | -1.0944300 | 0.6128690  |
| O      | 3.0802640  | -0.7196720 | -2.0938470 |
| H      | 2.5530870  | 2.0521420  | 1.7146650  |
| H      | 3.7391620  | -0.4544650 | 2.3118120  |
| H      | 0.2170280  | 1.2776020  | 0.2452150  |
| H      | 2.0877580  | 0.9476970  | -1.8265050 |
| H      | 0.0813890  | -0.6405140 | -1.7213940 |
| H      | 1.1549310  | -2.6176050 | -0.0878460 |
| H      | 3.2052460  | -2.6586810 | -1.3821990 |
| H      | 1.8582920  | -2.2944510 | -2.4788260 |
| H      | -2.2391570 | 2.7118900  | 0.9702980  |

|   |            |            |            |
|---|------------|------------|------------|
| C | -1.9282320 | -0.7192310 | -0.2861510 |
| C | -2.9473140 | -1.3936150 | 0.6222610  |
| C | -4.3388470 | -0.9921560 | 0.1703540  |
| C | -4.4676260 | 0.5219170  | 0.1402040  |
| C | -3.3478030 | 1.1257370  | -0.7065770 |
| C | -3.3149200 | 2.6434650  | -0.6326730 |
| O | -2.8675180 | -2.7977990 | 0.5476260  |
| O | -5.3372590 | -1.4880270 | 1.0322580  |
| O | -5.6910230 | 0.9098450  | -0.4369530 |
| O | -2.0840180 | 0.6761330  | -0.2323820 |
| O | -3.0731240 | 3.0945400  | 0.6791220  |
| H | -2.0656450 | -1.0608620 | -1.3306260 |
| H | -2.7747630 | -1.0367400 | 1.6479650  |
| H | -2.0010890 | -3.0676320 | 0.8677820  |
| H | -4.4964270 | -1.3755370 | -0.8517260 |
| H | -5.2271060 | -2.4423740 | 1.0999540  |
| H | -4.3763440 | 0.9074050  | 1.1660940  |
| H | -3.4908150 | 0.8171740  | -1.7550740 |
| H | -2.5483440 | 3.0124170  | -1.3269610 |
| H | -4.2881080 | 3.0348420  | -0.9359020 |
| H | -6.3946820 | 0.4567820  | 0.0397430  |
| C | 6.8140560  | -0.1356870 | 0.8266120  |
| C | 5.6885890  | 0.0932090  | -0.1796700 |
| H | 7.0242120  | -1.1996340 | 0.9656840  |
| H | 7.7363280  | 0.3489800  | 0.4914500  |
| H | 6.5434900  | 0.2913090  | 1.7972030  |

|   |           |            |            |
|---|-----------|------------|------------|
| C | 5.3929520 | 1.5777280  | -0.3832110 |
| H | 5.9593920 | -0.3697300 | -1.1383580 |
| H | 4.7856860 | -0.4141800 | 0.1881310  |
| H | 4.5507440 | 1.7486830  | -1.0614770 |
| H | 5.1442500 | 2.0454760  | 0.5740970  |
| H | 6.2680990 | 2.0902520  | -0.7946800 |

**TS7<sub>neat</sub>** –  $E = -1297.544456$  Hartree

| Symbol | X          | Y          | Z          |
|--------|------------|------------|------------|
| O      | 3.6977940  | 0.5027030  | 2.4265730  |
| H      | 3.8181440  | -0.5274960 | -1.5025480 |
| C      | 2.7328370  | 0.9919000  | 1.6016890  |
| C      | 2.0711740  | 0.2626200  | 0.7109540  |
| C      | 0.9911800  | 0.6941310  | -0.2503690 |
| C      | 0.4076520  | -0.6739900 | -0.6749510 |
| C      | 1.5558520  | -1.6617510 | -0.4393820 |
| C      | 2.4527550  | -1.9060390 | -1.6462640 |
| O      | 1.4311750  | 1.4656780  | -1.3396590 |
| O      | -0.6661290 | -1.0679920 | 0.1640270  |
| O      | 2.3350150  | -1.0944300 | 0.6128690  |
| O      | 3.0802640  | -0.7196720 | -2.0938470 |
| H      | 2.5530870  | 2.0521420  | 1.7146650  |
| H      | 3.7391620  | -0.4544650 | 2.3118120  |
| H      | 0.2170280  | 1.2776020  | 0.2452150  |
| H      | 2.0877580  | 0.9476970  | -1.8265050 |
| H      | 0.0813890  | -0.6405140 | -1.7213940 |

|   |            |            |            |
|---|------------|------------|------------|
| H | 1.1549310  | -2.6176050 | -0.0878460 |
| H | 3.2052460  | -2.6586810 | -1.3821990 |
| H | 1.8582920  | -2.2944510 | -2.4788260 |
| H | -2.2391570 | 2.7118900  | 0.9702980  |
| C | -1.9282320 | -0.7192310 | -0.2861510 |
| C | -2.9473140 | -1.3936150 | 0.6222610  |
| C | -4.3388470 | -0.9921560 | 0.1703540  |
| C | -4.4676260 | 0.5219170  | 0.1402040  |
| C | -3.3478030 | 1.1257370  | -0.7065770 |
| C | -3.3149200 | 2.6434650  | -0.6326730 |
| O | -2.8675180 | -2.7977990 | 0.5476260  |
| O | -5.3372590 | -1.4880270 | 1.0322580  |
| O | -5.6910230 | 0.9098450  | -0.4369530 |
| O | -2.0840180 | 0.6761330  | -0.2323820 |
| O | -3.0731240 | 3.0945400  | 0.6791220  |
| H | -2.0656450 | -1.0608620 | -1.3306260 |
| H | -2.7747630 | -1.0367400 | 1.6479650  |
| H | -2.0010890 | -3.0676320 | 0.8677820  |
| H | -4.4964270 | -1.3755370 | -0.8517260 |
| H | -5.2271060 | -2.4423740 | 1.0999540  |
| H | -4.3763440 | 0.9074050  | 1.1660940  |
| H | -3.4908150 | 0.8171740  | -1.7550740 |
| H | -2.5483440 | 3.0124170  | -1.3269610 |
| H | -4.2881080 | 3.0348420  | -0.9359020 |
| H | -6.3946820 | 0.4567820  | 0.0397430  |
| C | 6.8140560  | -0.1356870 | 0.8266120  |

|   |           |            |            |
|---|-----------|------------|------------|
| C | 5.6885890 | 0.0932090  | -0.1796700 |
| H | 7.0242120 | -1.1996340 | 0.9656840  |
| H | 7.7363280 | 0.3489800  | 0.4914500  |
| H | 6.5434900 | 0.2913090  | 1.7972030  |
| C | 5.3929520 | 1.5777280  | -0.3832110 |
| H | 5.9593920 | -0.3697300 | -1.1383580 |
| H | 4.7856860 | -0.4141800 | 0.1881310  |
| H | 4.5507440 | 1.7486830  | -1.0614770 |
| H | 5.1442500 | 2.0454760  | 0.5740970  |
| H | 6.2680990 | 2.0902520  | -0.7946800 |

**8** –  $E = -1297.614904$  Hartree

| Symbol | X          | Y          | Z          |
|--------|------------|------------|------------|
| O      | 3.6977940  | 0.5027030  | 2.4265730  |
| H      | 3.8181440  | -0.5274960 | -1.5025480 |
| C      | 2.7328370  | 0.9919000  | 1.6016890  |
| C      | 2.0711740  | 0.2626200  | 0.7109540  |
| C      | 0.9911800  | 0.6941310  | -0.2503690 |
| C      | 0.4076520  | -0.6739900 | -0.6749510 |
| C      | 1.5558520  | -1.6617510 | -0.4393820 |
| C      | 2.4527550  | -1.9060390 | -1.6462640 |
| O      | 1.4311750  | 1.4656780  | -1.3396590 |
| O      | -0.6661290 | -1.0679920 | 0.1640270  |
| O      | 2.3350150  | -1.0944300 | 0.6128690  |
| O      | 3.0802640  | -0.7196720 | -2.0938470 |
| H      | 2.5530870  | 2.0521420  | 1.7146650  |

|   |            |            |            |
|---|------------|------------|------------|
| H | 3.7391620  | -0.4544650 | 2.3118120  |
| H | 0.2170280  | 1.2776020  | 0.2452150  |
| H | 2.0877580  | 0.9476970  | -1.8265050 |
| H | 0.0813890  | -0.6405140 | -1.7213940 |
| H | 1.1549310  | -2.6176050 | -0.0878460 |
| H | 3.2052460  | -2.6586810 | -1.3821990 |
| H | 1.8582920  | -2.2944510 | -2.4788260 |
| H | -2.2391570 | 2.7118900  | 0.9702980  |
| C | -1.9282320 | -0.7192310 | -0.2861510 |
| C | -2.9473140 | -1.3936150 | 0.6222610  |
| C | -4.3388470 | -0.9921560 | 0.1703540  |
| C | -4.4676260 | 0.5219170  | 0.1402040  |
| C | -3.3478030 | 1.1257370  | -0.7065770 |
| C | -3.3149200 | 2.6434650  | -0.6326730 |
| O | -2.8675180 | -2.7977990 | 0.5476260  |
| O | -5.3372590 | -1.4880270 | 1.0322580  |
| O | -5.6910230 | 0.9098450  | -0.4369530 |
| O | -2.0840180 | 0.6761330  | -0.2323820 |
| O | -3.0731240 | 3.0945400  | 0.6791220  |
| H | -2.0656450 | -1.0608620 | -1.3306260 |
| H | -2.7747630 | -1.0367400 | 1.6479650  |
| H | -2.0010890 | -3.0676320 | 0.8677820  |
| H | -4.4964270 | -1.3755370 | -0.8517260 |
| H | -5.2271060 | -2.4423740 | 1.0999540  |
| H | -4.3763440 | 0.9074050  | 1.1660940  |
| H | -3.4908150 | 0.8171740  | -1.7550740 |

|   |            |            |            |
|---|------------|------------|------------|
| H | -2.5483440 | 3.0124170  | -1.3269610 |
| H | -4.2881080 | 3.0348420  | -0.9359020 |
| H | -6.3946820 | 0.4567820  | 0.0397430  |
| C | 6.8140560  | -0.1356870 | 0.8266120  |
| C | 5.6885890  | 0.0932090  | -0.1796700 |
| H | 7.0242120  | -1.1996340 | 0.9656840  |
| H | 7.7363280  | 0.3489800  | 0.4914500  |
| H | 6.5434900  | 0.2913090  | 1.7972030  |
| C | 5.3929520  | 1.5777280  | -0.3832110 |
| H | 5.9593920  | -0.3697300 | -1.1383580 |
| H | 4.7856860  | -0.4141800 | 0.1881310  |
| H | 4.5507440  | 1.7486830  | -1.0614770 |
| H | 5.1442500  | 2.0454760  | 0.5740970  |
| H | 6.2680990  | 2.0902520  | -0.7946800 |

**TS8<sub>neat</sub>** –  $E = -1297.49751$  Hartree

| Symbol | X         | Y          | Z          |
|--------|-----------|------------|------------|
| O      | 3.6977940 | 0.5027030  | 2.4265730  |
| H      | 3.8181440 | -0.5274960 | -1.5025480 |
| C      | 2.7328370 | 0.9919000  | 1.6016890  |
| C      | 2.0711740 | 0.2626200  | 0.7109540  |
| C      | 0.9911800 | 0.6941310  | -0.2503690 |
| C      | 0.4076520 | -0.6739900 | -0.6749510 |
| C      | 1.5558520 | -1.6617510 | -0.4393820 |
| C      | 2.4527550 | -1.9060390 | -1.6462640 |
| O      | 1.4311750 | 1.4656780  | -1.3396590 |



|   |            |            |            |
|---|------------|------------|------------|
| O | -0.6661290 | -1.0679920 | 0.1640270  |
| O | 2.3350150  | -1.0944300 | 0.6128690  |
| O | 3.0802640  | -0.7196720 | -2.0938470 |
| H | 2.5530870  | 2.0521420  | 1.7146650  |
| H | 3.7391620  | -0.4544650 | 2.3118120  |
| H | 0.2170280  | 1.2776020  | 0.2452150  |
| H | 2.0877580  | 0.9476970  | -1.8265050 |
| H | 0.0813890  | -0.6405140 | -1.7213940 |
| H | 1.1549310  | -2.6176050 | -0.0878460 |
| H | 3.2052460  | -2.6586810 | -1.3821990 |
| H | 1.8582920  | -2.2944510 | -2.4788260 |
| H | -2.2391570 | 2.7118900  | 0.9702980  |
| C | -1.9282320 | -0.7192310 | -0.2861510 |
| C | -2.9473140 | -1.3936150 | 0.6222610  |
| C | -4.3388470 | -0.9921560 | 0.1703540  |
| C | -4.4676260 | 0.5219170  | 0.1402040  |
| C | -3.3478030 | 1.1257370  | -0.7065770 |
| C | -3.3149200 | 2.6434650  | -0.6326730 |
| O | -2.8675180 | -2.7977990 | 0.5476260  |
| O | -5.3372590 | -1.4880270 | 1.0322580  |
| O | -5.6910230 | 0.9098450  | -0.4369530 |
| O | -2.0840180 | 0.6761330  | -0.2323820 |
| O | -3.0731240 | 3.0945400  | 0.6791220  |
| H | -2.0656450 | -1.0608620 | -1.3306260 |
| H | -2.7747630 | -1.0367400 | 1.6479650  |
| H | -2.0010890 | -3.0676320 | 0.8677820  |

|   |            |            |            |
|---|------------|------------|------------|
| H | -4.4964270 | -1.3755370 | -0.8517260 |
| H | -5.2271060 | -2.4423740 | 1.0999540  |
| H | -4.3763440 | 0.9074050  | 1.1660940  |
| H | -3.4908150 | 0.8171740  | -1.7550740 |
| H | -2.5483440 | 3.0124170  | -1.3269610 |
| H | -4.2881080 | 3.0348420  | -0.9359020 |
| H | -6.3946820 | 0.4567820  | 0.0397430  |
| C | 6.8140560  | -0.1356870 | 0.8266120  |
| C | 5.6885890  | 0.0932090  | -0.1796700 |
| H | 7.0242120  | -1.1996340 | 0.9656840  |
| H | 7.7363280  | 0.3489800  | 0.4914500  |
| H | 6.5434900  | 0.2913090  | 1.7972030  |
| C | 5.3929520  | 1.5777280  | -0.3832110 |
| H | 5.9593920  | -0.3697300 | -1.1383580 |
| H | 4.7856860  | -0.4141800 | 0.1881310  |
| H | 4.5507440  | 1.7486830  | -1.0614770 |
| H | 5.1442500  | 2.0454760  | 0.5740970  |
| H | 6.2680990  | 2.0902520  | -0.7946800 |

9 – E = -1221.175979 Hartree

| Symbol | X         | Y          | Z          |
|--------|-----------|------------|------------|
| O      | 3.6977940 | 0.5027030  | 2.4265730  |
| H      | 3.8181440 | -0.5274960 | -1.5025480 |
| C      | 2.7328370 | 0.9919000  | 1.6016890  |
| C      | 2.0711740 | 0.2626200  | 0.7109540  |
| C      | 0.9911800 | 0.6941310  | -0.2503690 |

|   |            |            |            |
|---|------------|------------|------------|
| C | 0.4076520  | -0.6739900 | -0.6749510 |
| C | 1.5558520  | -1.6617510 | -0.4393820 |
| C | 2.4527550  | -1.9060390 | -1.6462640 |
| O | 1.4311750  | 1.4656780  | -1.3396590 |
| O | -0.6661290 | -1.0679920 | 0.1640270  |
| O | 2.3350150  | -1.0944300 | 0.6128690  |
| O | 3.0802640  | -0.7196720 | -2.0938470 |
| H | 2.5530870  | 2.0521420  | 1.7146650  |
| H | 3.7391620  | -0.4544650 | 2.3118120  |
| H | 0.2170280  | 1.2776020  | 0.2452150  |
| H | 2.0877580  | 0.9476970  | -1.8265050 |
| H | 0.0813890  | -0.6405140 | -1.7213940 |
| H | 1.1549310  | -2.6176050 | -0.0878460 |
| H | 3.2052460  | -2.6586810 | -1.3821990 |
| H | 1.8582920  | -2.2944510 | -2.4788260 |
| H | -2.2391570 | 2.7118900  | 0.9702980  |
| C | -1.9282320 | -0.7192310 | -0.2861510 |
| C | -2.9473140 | -1.3936150 | 0.6222610  |
| C | -4.3388470 | -0.9921560 | 0.1703540  |
| C | -4.4676260 | 0.5219170  | 0.1402040  |
| C | -3.3478030 | 1.1257370  | -0.7065770 |
| C | -3.3149200 | 2.6434650  | -0.6326730 |
| O | -2.8675180 | -2.7977990 | 0.5476260  |
| O | -5.3372590 | -1.4880270 | 1.0322580  |
| O | -5.6910230 | 0.9098450  | -0.4369530 |
| O | -2.0840180 | 0.6761330  | -0.2323820 |

|   |            |            |            |
|---|------------|------------|------------|
| O | -3.0731240 | 3.0945400  | 0.6791220  |
| H | -2.0656450 | -1.0608620 | -1.3306260 |
| H | -2.7747630 | -1.0367400 | 1.6479650  |
| H | -2.0010890 | -3.0676320 | 0.8677820  |
| H | -4.4964270 | -1.3755370 | -0.8517260 |
| H | -5.2271060 | -2.4423740 | 1.0999540  |
| H | -4.3763440 | 0.9074050  | 1.1660940  |
| H | -3.4908150 | 0.8171740  | -1.7550740 |
| H | -2.5483440 | 3.0124170  | -1.3269610 |
| H | -4.2881080 | 3.0348420  | -0.9359020 |
| H | -6.3946820 | 0.4567820  | 0.0397430  |
| C | 6.8140560  | -0.1356870 | 0.8266120  |
| C | 5.6885890  | 0.0932090  | -0.1796700 |
| H | 7.0242120  | -1.1996340 | 0.9656840  |
| H | 7.7363280  | 0.3489800  | 0.4914500  |
| H | 6.5434900  | 0.2913090  | 1.7972030  |
| C | 5.3929520  | 1.5777280  | -0.3832110 |
| H | 5.9593920  | -0.3697300 | -1.1383580 |
| H | 4.7856860  | -0.4141800 | 0.1881310  |
| H | 4.5507440  | 1.7486830  | -1.0614770 |
| H | 5.1442500  | 2.0454760  | 0.5740970  |
| H | 6.2680990  | 2.0902520  | -0.7946800 |

**TS9<sub>neat</sub>** –  $E = -1221.11262$  Hartree

| Symbol | X          | Y          | Z          |
|--------|------------|------------|------------|
| O      | -3.5393930 | -2.6100730 | -0.0646620 |

|   |            |            |            |
|---|------------|------------|------------|
| H | -4.8879490 | 0.6545350  | -0.8620090 |
| C | -3.7271320 | -1.6381850 | 0.7302830  |
| C | -2.9406790 | -0.5042420 | 0.6049250  |
| C | -1.9102740 | -0.5058240 | -0.3576050 |
| C | -1.5079790 | 0.9447000  | -0.5496230 |
| C | -2.6630560 | 1.6999980  | 0.1401720  |
| C | -3.7170900 | 2.1953350  | -0.8434860 |
| O | -2.6218580 | -1.1373620 | -1.8737340 |
| O | -0.3072920 | 1.2343950  | 0.1384010  |
| O | -3.2718020 | 0.7860150  | 1.0475970  |
| O | -4.3503540 | 1.1172390  | -1.5156810 |
| H | -4.5397310 | -1.6866300 | 1.4668640  |
| H | -3.0471830 | -1.9139950 | -1.2948620 |
| H | -1.1417870 | -1.2678550 | -0.3804870 |
| H | -3.3297380 | -0.5003100 | -2.0785570 |
| H | -1.4086630 | 1.2058860  | -1.6117630 |
| H | -2.2625190 | 2.5440770  | 0.7097870  |
| H | -4.4618550 | 2.7918850  | -0.3052160 |
| H | -3.2571280 | 2.8259320  | -1.6103420 |
| H | 1.2589380  | -2.5584840 | -0.0687320 |
| C | 0.8702760  | 1.0422000  | -0.5724710 |
| C | 2.0050720  | 1.5103970  | 0.3290430  |
| C | 3.3288270  | 1.2295640  | -0.3533520 |
| C | 3.4243370  | -0.2464580 | -0.6988480 |
| C | 2.2198180  | -0.6687880 | -1.5383990 |
| C | 2.1615520  | -2.1748760 | -1.7417780 |

|   |            |            |            |
|---|------------|------------|------------|
| O | 1.9351330  | 2.8940060  | 0.5787600  |
| O | 4.4225210  | 1.5442340  | 0.4764710  |
| O | 4.5782710  | -0.5137820 | -1.4573740 |
| O | 1.0093840  | -0.3211870 | -0.8757980 |
| O | 2.0566120  | -2.8608290 | -0.5168320 |
| H | 0.8508170  | 1.6301370  | -1.5107410 |
| H | 1.9474680  | 0.9314420  | 1.2629260  |
| H | 1.1418220  | 3.0696290  | 1.0946200  |
| H | 3.3785660  | 1.8151590  | -1.2867700 |
| H | 4.3283780  | 2.4590020  | 0.7628630  |
| H | 3.4200830  | -0.8292490 | 0.2348740  |
| H | 2.2748840  | -0.1670690 | -2.5179820 |
| H | 1.3166090  | -2.4088070 | -2.4032990 |
| H | 3.0872330  | -2.5044670 | -2.2177520 |
| H | 5.3342690  | -0.1716760 | -0.9683030 |
| C | -0.2877300 | -0.0281700 | 3.1814120  |
| C | 0.3332910  | -1.2128260 | 2.4452640  |
| H | -1.2586530 | 0.2442980  | 2.7574240  |
| H | -0.4277780 | -0.2589710 | 4.2425740  |
| H | 0.3647270  | 0.8515520  | 3.1207250  |
| C | 1.7046870  | -1.5962060 | 2.9984680  |
| H | -0.3449060 | -2.0726990 | 2.5007490  |
| H | 0.4273340  | -0.9570480 | 1.3840490  |
| H | 2.1503360  | -2.4272530 | 2.4438990  |
| H | 2.3998480  | -0.7496850 | 2.9437050  |
| H | 1.6332970  | -1.8903090 | 4.0505330  |

10 – E = -1144.757178 Hartree

| Symbol | X          | Y          | Z          |
|--------|------------|------------|------------|
| O      | -3.4299480 | -3.0438970 | -0.7352250 |
| H      | -4.6604030 | 1.4387670  | -1.5219510 |
| C      | -3.8280150 | -2.0676320 | -0.1599750 |
| C      | -3.1187800 | -0.7658170 | -0.1982140 |
| C      | -1.9669890 | -0.4587190 | -0.7903500 |
| C      | -1.6376610 | 0.9728920  | -0.4646040 |
| C      | -2.8622990 | 1.4044110  | 0.3726630  |
| C      | -3.6700370 | 2.5222080  | -0.2576700 |
| O      | -0.4830990 | 1.1206690  | 0.3548760  |
| O      | -3.7152530 | 0.2488910  | 0.4895300  |
| O      | -4.0669240 | 2.1951180  | -1.5676870 |
| H      | -4.7531090 | -2.0790310 | 0.4474740  |
| H      | -1.3634130 | -1.1274620 | -1.3822150 |
| H      | -1.5202340 | 1.5942830  | -1.3632290 |
| H      | -2.5305120 | 1.6815400  | 1.3787920  |
| H      | -4.5338840 | 2.7533000  | 0.3787240  |
| H      | -3.0453970 | 3.4182000  | -0.3272600 |
| H      | 1.1539160  | -2.4072170 | -0.7748840 |
| C      | 0.7326190  | 1.1562960  | -0.3085430 |
| C      | 1.7991010  | 1.3810320  | 0.7560840  |
| C      | 3.1714900  | 1.3027950  | 0.1189820  |
| C      | 3.3294390  | -0.0283480 | -0.5945030 |
| C      | 2.1968500  | -0.2171370 | -1.6019130 |

|   |            |            |            |
|---|------------|------------|------------|
| C | 2.1916750  | -1.6134450 | -2.2054700 |
| O | 1.6769170  | 2.6491030  | 1.3556940  |
| O | 4.2003220  | 1.3979440  | 1.0768520  |
| O | 4.5403710  | -0.0781420 | -1.3085760 |
| O | 0.9357460  | -0.0722230 | -0.9614580 |
| O | 1.9847990  | -2.6010270 | -1.2240030 |
| H | 0.7455140  | 1.9757370  | -1.0532240 |
| H | 1.6965880  | 0.5756880  | 1.4997190  |
| H | 0.8290950  | 2.6889820  | 1.8092990  |
| H | 3.2656890  | 2.1141520  | -0.6221060 |
| H | 4.0636240  | 2.2049840  | 1.5844100  |
| H | 3.2743790  | -0.8381760 | 0.1490230  |
| H | 2.3072510  | 0.5305740  | -2.4039310 |
| H | 1.4181400  | -1.6589080 | -2.9843510 |
| H | 3.1643280  | -1.8078770 | -2.6618870 |
| H | 5.2497980  | 0.1383880  | -0.6940560 |
| C | 1.3117500  | -2.4063610 | 2.3721160  |
| C | -0.0284130 | -1.9559380 | 1.7936270  |
| H | 1.8928410  | -2.9832700 | 1.6467460  |
| H | 1.9178170  | -1.5436500 | 2.6732610  |
| H | 1.1660330  | -3.0282200 | 3.2612570  |
| C | -0.8354930 | -1.1107730 | 2.7757610  |
| H | 0.1409280  | -1.3653860 | 0.8870100  |
| H | -0.6155680 | -2.8324780 | 1.4934970  |
| H | -1.7878690 | -0.7884740 | 2.3419690  |
| H | -1.0510380 | -1.6695840 | 3.6922960  |



|   |            |            |           |
|---|------------|------------|-----------|
| H | -0.2793970 | -0.2091310 | 3.0576490 |
|---|------------|------------|-----------|

**TS10<sub>neat</sub>** –  $E = -1144.667034$  Hartree

| Symbol | X          | Y          | Z          |
|--------|------------|------------|------------|
| O      | -5.6851790 | -1.8409150 | -0.6811390 |
| H      | -3.5076450 | 3.1180110  | -0.1752260 |
| C      | -5.3393210 | -1.0026010 | 0.1015170  |
| C      | -3.9583150 | -0.4392710 | 0.0741450  |
| C      | -2.8952620 | -0.7826770 | -0.7340740 |
| C      | -1.8415580 | 0.0268120  | -0.3191630 |
| C      | -2.3068740 | 0.8392890  | 0.7996460  |
| C      | -2.0541120 | 2.3276860  | 0.8591300  |
| O      | -0.7148520 | -1.0220480 | 1.4287230  |
| O      | -3.6941980 | 0.5157670  | 0.9353450  |
| O      | -2.5571900 | 3.0108050  | -0.2644780 |
| H      | -6.0043820 | -0.5911620 | 0.8810230  |
| H      | -2.9143560 | -1.5374880 | -1.5028410 |
| H      | -0.8629220 | 0.1240250  | -0.7639230 |
| H      | -1.7044770 | 0.2426690  | 1.6066350  |
| H      | -2.4636780 | 2.7224830  | 1.7956540  |
| H      | -0.9700990 | 2.4645030  | 0.8759820  |
| H      | 1.0293750  | 2.2255660  | -0.6798030 |
| C      | 0.5816130  | -0.7370780 | 1.5300520  |
| C      | 1.4400950  | -1.6999840 | 0.6995690  |
| C      | 2.9057260  | -1.3504920 | 0.8393350  |
| C      | 3.1434450  | 0.0988550  | 0.4518300  |

|   |            |            |            |
|---|------------|------------|------------|
| C | 2.1916930  | 1.0143300  | 1.2243910  |
| C | 2.2893260  | 2.4612860  | 0.7699090  |
| O | 1.2560490  | -3.0253850 | 1.1355680  |
| O | 3.7321460  | -2.1480800 | 0.0133550  |
| O | 4.4620080  | 0.4935230  | 0.7568880  |
| O | 0.8482080  | 0.6058880  | 1.0357730  |
| O | 1.9011360  | 2.6219580  | -0.5773210 |
| H | 0.9411300  | -0.7621530 | 2.5824850  |
| H | 1.1317040  | -1.5925130 | -0.3540680 |
| H | 0.3078140  | -3.1293480 | 1.2862380  |
| H | 3.1942030  | -1.4800410 | 1.8953890  |
| H | 3.5355670  | -3.0710200 | 0.2057950  |
| H | 2.9479260  | 0.2145060  | -0.6245080 |
| H | 2.4583730  | 0.9639230  | 2.2935250  |
| H | 1.6693510  | 3.0820630  | 1.4327990  |
| H | 3.3265030  | 2.7939400  | 0.8464710  |
| H | 5.0535510  | -0.1632570 | 0.3741460  |
| C | 2.2615620  | 0.5643740  | -3.3388370 |
| C | 0.9109070  | 0.2118350  | -2.7218450 |
| H | 2.6157280  | 1.5350940  | -2.9828540 |
| H | 3.0102690  | -0.1898820 | -3.0722050 |
| H | 2.1949780  | 0.5944340  | -4.4310790 |
| C | 0.4262690  | -1.1761940 | -3.1340160 |
| H | 1.0084630  | 0.2525240  | -1.6295460 |
| H | 0.1664390  | 0.9684210  | -3.0025900 |
| H | -0.5280780 | -1.4385970 | -2.6642300 |

|   |           |            |            |
|---|-----------|------------|------------|
| H | 0.2907720 | -1.2366880 | -4.2183740 |
| H | 1.1573090 | -1.9391230 | -2.8461500 |

**11** (5-Hydroxymethylfurfural) –  $E = -457.751131$  Hartree

| Symbol | X          | Y          | Z          |
|--------|------------|------------|------------|
| C      | 2.4685550  | -0.2977470 | -0.0655630 |
| C      | 1.1622000  | 0.3484730  | -0.0231950 |
| C      | 0.8059150  | 1.6556760  | -0.1883010 |
| C      | -0.6120950 | 1.6999420  | -0.0571670 |
| C      | -1.0051360 | 0.4171060  | 0.1831310  |
| C      | -2.3261700 | -0.2374790 | 0.4116230  |
| O      | 2.6561060  | -1.4777970 | 0.0854930  |
| O      | 0.0612640  | -0.4056240 | 0.2081490  |
| O      | -2.6054260 | -1.2318160 | -0.5478750 |
| H      | 3.3023930  | 0.4066080  | -0.2547180 |
| H      | 1.4795510  | 2.4752740  | -0.3856310 |
| H      | -1.2588430 | 2.5585900  | -0.1366680 |
| H      | -1.9114610 | -1.8975710 | -0.5113550 |
| H      | -2.3552870 | -0.6530210 | 1.4284610  |
| H      | -3.1115290 | 0.5161880  | 0.3306020  |

**H<sub>2</sub>O** –  $E = -76.402433$  Hartree

| Symbol | X         | Y          | Z          |
|--------|-----------|------------|------------|
| O      | 0.0000000 | 0.0000000  | 0.1162040  |
| H      | 0.0000000 | 0.7639660  | -0.4648180 |
| H      | 0.0000000 | -0.7639660 | -0.4648180 |

C3 –  $E = \text{Hartree}$

| Symbol | X          | Y          | Z          |
|--------|------------|------------|------------|
| C      | 1.2668270  | -0.2606740 | -0.0000210 |
| C      | 0.0000000  | 0.5911300  | -0.0000170 |
| H      | 2.1693450  | 0.3564520  | -0.0000680 |
| H      | 1.3012420  | -0.9068570 | 0.8831920  |
| H      | 1.3011930  | -0.9069190 | -0.8831910 |
| C      | -1.2668260 | -0.2606740 | 0.0000360  |
| H      | 0.0000200  | 1.2480020  | 0.8768340  |
| H      | -0.0000200 | 1.2479520  | -0.8769040 |
| H      | -2.1693450 | 0.3564510  | 0.0000450  |
| H      | -1.3012400 | -0.9069080 | -0.8831390 |
| H      | -1.3011950 | -0.9068670 | 0.8832430  |

Bz –  $E = -232.163063 \text{ Hartree}$

| Symbol | X          | Y          | Z          |
|--------|------------|------------|------------|
| C      | -0.3379690 | -1.3498690 | -0.0004120 |
| C      | 0.9997080  | -0.9678540 | 0.0002010  |
| C      | -1.3381450 | -0.3819810 | 0.0003560  |
| C      | 1.3381610  | 0.3824140  | 0.0000930  |
| C      | -1.0002410 | 0.9675590  | -0.0000320 |
| C      | 0.3383050  | 1.3496830  | -0.0001660 |
| H      | 1.7795750  | -1.7215520 | 0.0002760  |
| H      | -2.3809440 | -0.6799580 | 0.0005490  |
| H      | 2.3809750  | 0.6800270  | 0.0001480  |

|   |            |            |            |
|---|------------|------------|------------|
| H | -1.7791480 | 1.7220730  | -0.0002240 |
| H | 0.6013510  | 2.4018600  | -0.0002660 |
| H | -0.6007250 | -2.4021610 | -0.0007250 |

DME –  $E = -154.965347$  Hartree

| Symbol | X          | Y          | Z          |
|--------|------------|------------|------------|
| O      | 0.0000000  | 0.5893480  | -0.0000130 |
| C      | 1.1623440  | -0.1945340 | 0.0000200  |
| C      | -1.1623430 | -0.1945350 | -0.0000110 |
| H      | 1.2099230  | -0.8360630 | 0.8925400  |
| H      | 2.0182660  | 0.4819760  | 0.0000190  |
| H      | 1.2099490  | -0.8360980 | -0.8924740 |
| H      | -1.2099530 | -0.8360520 | 0.8925150  |
| H      | -1.2099180 | -0.8361080 | -0.8924990 |
| H      | -2.0182660 | 0.4819760  | -0.0000490 |

Ace –  $E = -193.083758$  Hartree

| Symbol | X          | Y          | Z          |
|--------|------------|------------|------------|
| O      | -0.0000020 | 1.3919910  | 0.0000210  |
| C      | 0.0000000  | 0.1868530  | -0.0001370 |
| C      | 1.2860890  | -0.6114360 | -0.0000270 |
| C      | -1.2860880 | -0.6114390 | -0.0000280 |
| H      | 1.3223660  | -1.2597290 | 0.8809580  |
| H      | 1.3213600  | -1.2623500 | -0.8790860 |
| H      | 2.1422330  | 0.0621850  | -0.0013810 |
| H      | -2.1422330 | 0.0621810  | -0.0014000 |

|   |            |            |            |
|---|------------|------------|------------|
| H | -1.3223700 | -1.2597170 | 0.8809690  |
| H | -1.3213470 | -1.2623690 | -0.8790740 |

### In the Presence of Propane (C3)

The Cartesian coordinates for all the stable structures in the presence of C3 reported in this work are listed below including computed absolute energies.

$\mathbf{1C_3} - E = -1416.704909$  Hartree

| Symbol | X         | Y          | Z          |
|--------|-----------|------------|------------|
| C      | 4.3590810 | -0.0151650 | 0.0060080  |
| C      | 3.4683470 | 1.0832280  | -0.5710830 |
| C      | 2.0935130 | 1.0181460  | 0.0698770  |
| C      | 1.5587570 | -0.4050060 | -0.0179560 |
| C      | 2.5511240 | -1.4176390 | 0.5482830  |
| C      | 2.0770130 | -2.8493230 | 0.3688930  |
| O      | 5.5528890 | 0.0197700  | -0.6983400 |
| O      | 4.0304070 | 2.3432340  | -0.3134120 |
| O      | 1.2328110 | 1.9171820  | -0.5810670 |
| O      | 0.3524590 | -0.4674470 | 0.7265560  |
| O      | 3.7807120 | -1.2918860 | -0.1474550 |
| O      | 1.8468920 | -3.1535880 | -0.9899870 |
| H      | 4.5237480 | 0.1760370  | 1.0818540  |
| H      | 3.3660600 | 0.8998600  | -1.6516860 |
| H      | 2.1950040 | 1.2848010  | 1.1361410  |
| H      | 1.3665170 | -0.6437990 | -1.0717570 |
| H      | 2.6933850 | -1.2180300 | 1.6232990  |
| H      | 6.1789450 | -0.5875570 | -0.2933230 |
| H      | 4.9013960 | 2.3652320  | -0.7229190 |

|   |            |            |            |
|---|------------|------------|------------|
| H | 0.3275020  | 1.6239450  | -0.4105110 |
| H | -2.3098340 | 2.4256740  | -1.1881500 |
| H | 2.6649970  | -2.9831140 | -1.4692930 |
| H | 2.8240950  | -3.5255530 | 0.8043110  |
| H | 1.1303960  | -2.9874790 | 0.8992690  |
| C | -0.7423540 | -0.9538510 | 0.0413310  |
| C | -1.8046440 | -1.3496390 | 1.0558350  |
| C | -3.1108730 | -1.6550930 | 0.3410990  |
| C | -3.5127200 | -0.4870270 | -0.5399940 |
| C | -2.3788350 | -0.2109870 | -1.5309410 |
| C | -2.6598010 | 0.9733610  | -2.4389950 |
| O | -1.3318350 | -2.4735190 | 1.7541830  |
| O | -4.0697920 | -1.9313790 | 1.3354780  |
| O | -4.7143620 | -0.8469220 | -1.1916150 |
| O | -1.2055450 | 0.0942040  | -0.7949160 |
| O | -3.0533960 | 2.1195460  | -1.7192670 |
| H | -0.4692380 | -1.8231900 | -0.5834660 |
| H | -1.9587390 | -0.4958690 | 1.7341930  |
| H | -2.0648560 | -2.8179490 | 2.2763340  |
| H | -2.9634890 | -2.5414170 | -0.2989390 |
| H | -4.9185180 | -2.0536580 | 0.8963540  |
| H | -3.6584400 | 0.4028970  | 0.0862080  |
| H | -2.2152690 | -1.1059470 | -2.1540560 |
| H | -1.7697070 | 1.1672720  | -3.0506030 |
| H | -3.4854120 | 0.7229030  | -3.1108250 |
| H | -5.1863300 | -0.0474220 | -1.4408530 |

|   |            |           |           |
|---|------------|-----------|-----------|
| C | -1.8199530 | 3.9152790 | 0.9534220 |
| C | -1.6071840 | 2.5752470 | 1.6564060 |
| H | -2.7753820 | 3.9529210 | 0.4202330 |
| H | -1.8146590 | 4.7379520 | 1.6754970 |
| H | -1.0118050 | 4.1101370 | 0.2381860 |
| C | -0.3024900 | 2.5414330 | 2.4494190 |
| H | -2.4535450 | 2.3682690 | 2.3221330 |
| H | -1.5993570 | 1.7651310 | 0.9165430 |
| H | -0.1120170 | 1.5478450 | 2.8656040 |
| H | 0.5420690  | 2.8080800 | 1.8051490 |
| H | -0.3313310 | 3.2606730 | 3.2741990 |

**TS1c3** –  $E = -1416.624944$  Hartree

| Symbol | X         | Y          | Z          |
|--------|-----------|------------|------------|
| C      | 4.1533080 | -0.7985250 | -0.1425040 |
| C      | 3.3590620 | -0.1844540 | -1.2914370 |
| C      | 2.1682810 | 0.5971360  | -0.7588510 |
| C      | 1.3925600 | -0.2660500 | 0.2378430  |
| C      | 2.3144790 | -0.8437150 | 1.3057890  |
| C      | 1.5772740 | -1.7706320 | 2.2547100  |
| O      | 5.1362710 | -1.5979400 | -0.7077990 |
| O      | 4.1814750 | 0.6810710  | -2.0311270 |
| O      | 1.3678510 | 0.9612830  | -1.8550560 |
| O      | 0.3887280 | 0.4585090  | 0.9016540  |
| O      | 3.3404380 | -1.5999880 | 0.6860490  |
| O      | 0.8791210 | -2.7898260 | 1.5630920  |



|   |            |            |            |
|---|------------|------------|------------|
| H | 4.5972290  | 0.0084880  | 0.4680740  |
| H | 2.9826690  | -1.0106830 | -1.9144650 |
| H | 2.5411670  | 1.4918240  | -0.2308960 |
| H | 0.9615180  | -1.1073180 | -0.3335510 |
| H | 2.7493160  | -0.0150110 | 1.8903880  |
| H | 5.7241090  | -1.9143050 | -0.0157090 |
| H | 4.9202150  | 0.1647990  | -2.3690990 |
| H | 0.5103740  | 1.2877010  | -1.5370840 |
| H | -0.2571050 | 0.7634720  | 0.2175410  |
| H | 1.5150570  | -3.2547850 | 1.0080340  |
| H | 2.2945650  | -2.2020700 | 2.9638980  |
| H | 0.8324680  | -1.1962920 | 2.8094990  |
| C | -1.7594130 | -1.1828730 | 0.3560070  |
| C | -2.8423930 | -0.4369070 | 1.0928850  |
| C | -3.8863890 | 0.2683690  | 0.2036500  |
| C | -4.0235040 | -0.5376560 | -1.1004410 |
| C | -2.6837850 | -0.8384470 | -1.7521390 |
| C | -1.7984360 | 0.3907660  | -2.0892930 |
| O | -3.3913900 | -1.4804380 | 1.8817190  |
| O | -3.6203390 | 1.6090960  | -0.0087460 |
| O | -4.6096520 | -1.8072630 | -0.8126940 |
| O | -1.8510080 | -1.5957300 | -0.8285820 |
| O | -1.3666770 | 1.0000570  | -0.9444370 |
| H | -0.9561450 | -1.6524560 | 0.9288570  |
| H | -2.3773190 | 0.2870440  | 1.7652420  |
| H | -3.9324140 | -2.0310920 | 1.2985590  |

|   |            |            |            |
|---|------------|------------|------------|
| H | -4.8395180 | 0.1932320  | 0.7423220  |
| H | -2.6773970 | 1.6361420  | -0.3573220 |
| H | -4.6215700 | 0.0341620  | -1.8189290 |
| H | -2.8191580 | -1.5053020 | -2.6037950 |
| H | -0.9683310 | 0.0250010  | -2.7151320 |
| H | -2.4252970 | 1.0485950  | -2.7174430 |
| H | -5.5578000 | -1.6954690 | -0.6963710 |
| C | 1.6050020  | 3.5338860  | 1.6352150  |
| C | 0.4923780  | 3.7481460  | 0.6119490  |
| H | 2.5950260  | 3.6890870  | 1.1951040  |
| H | 1.4997390  | 4.2284320  | 2.4757230  |
| H | 1.5583380  | 2.5139060  | 2.0309830  |
| C | -0.8925680 | 3.5311050  | 1.2144110  |
| H | 0.5599540  | 4.7608780  | 0.1989610  |
| H | 0.6335520  | 3.0650120  | -0.2334090 |
| H | -1.6853630 | 3.6735710  | 0.4758470  |
| H | -0.9812840 | 2.5146630  | 1.6134890  |
| H | -1.0702830 | 4.2272350  | 2.0413450  |

$2c_3 - E = -1340.284902$  Hartree

| Symbol | X          | Y          | Z          |
|--------|------------|------------|------------|
| C      | -3.8333510 | 0.1042440  | -0.9183440 |
| C      | -3.3782300 | 1.2693280  | -0.0295310 |
| C      | -2.7671330 | 0.7099390  | 1.2716210  |
| C      | -1.8539810 | -0.4950130 | 0.9644210  |
| C      | -2.4871800 | -1.4348740 | -0.0735970 |

|   |            |            |            |
|---|------------|------------|------------|
| C | -3.9125520 | -1.8699770 | 0.2602420  |
| O | -2.4847120 | 2.0888690  | -0.7341380 |
| O | -3.7498480 | 0.3648690  | 2.2217830  |
| O | -2.7159310 | -0.6802500 | -1.2625860 |
| O | -4.6937140 | -0.7551370 | -0.1791210 |
| H | -4.3221660 | 0.4410390  | -1.8340810 |
| H | -4.2440240 | 1.8863470  | 0.2323470  |
| H | -1.6414320 | 1.6232880  | -0.8103510 |
| H | -2.1384370 | 1.4889800  | 1.7131600  |
| H | -4.5558480 | 0.1167700  | 1.7557330  |
| H | -1.6378340 | -1.0233930 | 1.9018140  |
| H | -1.8257990 | -2.2655800 | -0.3258170 |
| H | -4.1941150 | -2.7576530 | -0.3123120 |
| H | -4.0795320 | -2.0424870 | 1.3256680  |
| O | -0.6681430 | 0.0530620  | 0.4065680  |
| C | 0.4474660  | -0.7759150 | 0.3526160  |
| C | 1.0170670  | -0.7179670 | -1.0602030 |
| O | 1.3689860  | -0.3055640 | 1.2966230  |
| H | 0.1711820  | -1.8191570 | 0.5930970  |
| C | 2.3083980  | -1.5082930 | -1.1097170 |
| O | 0.1265580  | -1.2935470 | -1.9864600 |
| H | 1.2241860  | 0.3357620  | -1.3003180 |
| C | 2.5956090  | -1.0258950 | 1.3257960  |
| C | 3.2670370  | -1.0011620 | -0.0467900 |
| O | 2.9524550  | -1.3914070 | -2.3576980 |
| H | 2.0791300  | -2.5668560 | -0.8989520 |

|   |            |            |            |
|---|------------|------------|------------|
| H | -0.6916970 | -0.7787120 | -2.0159450 |
| C | 3.4469820  | -0.3515790 | 2.3903020  |
| H | 2.4144610  | -2.0753030 | 1.6116390  |
| O | 4.4102270  | -1.8189410 | 0.0307970  |
| H | 3.5402850  | 0.0375750  | -0.2815900 |
| H | 2.3244880  | -1.6449570 | -3.0426730 |
| O | 3.6489320  | 1.0116160  | 2.1014800  |
| H | 2.9614920  | -0.4826840 | 3.3665560  |
| H | 4.4291480  | -0.8279050 | 2.4151250  |
| H | 2.7824510  | 1.4263950  | 2.0225450  |
| H | 4.7870010  | -1.8761200 | -0.8537950 |
| C | 0.6424420  | 3.3039580  | -1.1736020 |
| C | 1.7867050  | 2.9066570  | -0.2439660 |
| H | -0.2847320 | 3.4913270  | -0.6257080 |
| H | 0.8911850  | 4.2118150  | -1.7326560 |
| H | 0.4486920  | 2.5176420  | -1.9149450 |
| C | 3.0985030  | 2.6882370  | -0.9948480 |
| H | 1.9271070  | 3.6865930  | 0.5134270  |
| H | 1.5080410  | 1.9939400  | 0.2979390  |
| H | 3.9049040  | 2.3949100  | -0.3164140 |
| H | 2.9932570  | 1.9055810  | -1.7563880 |
| H | 3.4034290  | 3.6041450  | -1.5114910 |

**TS2<sub>C3</sub>** –  $E = -1340.195729$  Hartree

| Symbol | X         | Y          | Z         |
|--------|-----------|------------|-----------|
| C      | 3.5704580 | -1.6581800 | 0.6121670 |

|   |            |            |            |
|---|------------|------------|------------|
| C | 3.0679110  | -0.2084540 | 0.6039740  |
| C | 1.9113140  | -0.0790140 | -0.4044890 |
| C | 0.9401830  | -1.2782580 | -0.2716930 |
| C | 1.6956690  | -2.5946500 | -0.0746250 |
| C | 2.7388390  | -2.8626680 | -1.1600310 |
| O | 2.6768430  | 0.1563360  | 1.9007780  |
| O | 2.3702260  | 0.0755680  | -1.7333370 |
| O | 2.5371950  | -2.4883790 | 1.0679780  |
| O | 3.8553900  | -2.0847500 | -0.7205780 |
| H | 4.4449660  | -1.7968350 | 1.2505540  |
| H | 3.8746300  | 0.4681600  | 0.3015680  |
| H | 1.9244210  | -0.4017090 | 2.1432250  |
| H | 1.3508270  | 0.8268720  | -0.1479850 |
| H | 3.1920030  | -0.4193090 | -1.8284880 |
| H | 0.3653980  | -1.3363040 | -1.2144420 |
| H | 1.0015570  | -3.4205800 | 0.0916240  |
| H | 3.0200190  | -3.9193340 | -1.1871360 |
| H | 2.4299510  | -2.5319930 | -2.1547770 |
| O | 0.1016180  | -1.1046980 | 0.8421990  |
| H | -0.3199670 | -0.1740640 | 0.7638640  |
| O | -1.1366500 | 1.0488450  | 0.5039440  |
| C | -1.4028890 | 1.4439190  | -0.7724400 |
| C | -2.5777720 | 0.6219250  | -1.3610250 |
| H | -0.5449000 | 1.3116920  | -1.4574280 |
| H | -1.7089730 | 2.5038940  | -0.8476580 |
| C | -3.9406770 | 0.8155320  | -0.7037730 |

|   |            |            |            |
|---|------------|------------|------------|
| O | -2.1683420 | -0.7707940 | -1.1816480 |
| H | -2.6449250 | 0.7319180  | -2.4464480 |
| C | -3.9235350 | 0.5235140  | 0.8060850  |
| O | -4.8707650 | -0.1182670 | -1.2431130 |
| H | -4.2602880 | 1.8520520  | -0.8587930 |
| C | -2.3014660 | -1.2962340 | -0.0492180 |
| C | -3.2764540 | -0.8652930 | 1.0166260  |
| O | -3.3479490 | 1.5291920  | 1.5547120  |
| H | -4.9687860 | 0.4177340  | 1.1168320  |
| H | -1.8563250 | -2.2831930 | 0.0455080  |
| O | -4.2095780 | -1.9316940 | 0.9664740  |
| H | -2.7727050 | -0.8932710 | 1.9852770  |
| H | -2.3657460 | 1.4972940  | 1.3234690  |
| H | -4.8198830 | -1.7505100 | 0.2380390  |
| H | -5.0028430 | 0.0360240  | -2.1829020 |
| C | 3.5843030  | 4.4306730  | -0.2502210 |
| C | 2.6427650  | 3.2588700  | 0.0176020  |
| H | 4.6139030  | 4.0961810  | -0.4060880 |
| H | 3.2728680  | 4.9841390  | -1.1426280 |
| H | 3.5825110  | 5.1317240  | 0.5909160  |
| C | 1.1998230  | 3.7140070  | 0.2285830  |
| H | 2.6897330  | 2.5564950  | -0.8238210 |
| H | 2.9757990  | 2.7083420  | 0.9053380  |
| H | 0.5425070  | 2.8794460  | 0.4931050  |
| H | 1.1425430  | 4.4468380  | 1.0406510  |
| H | 0.8069740  | 4.1932940  | -0.6757930 |

TS3<sub>C3</sub> – E = -1416.624784 Hartree

| Symbol | X         | Y          | Z          |
|--------|-----------|------------|------------|
| O      | 4.1915470 | 1.7974260  | 0.6197060  |
| H      | 5.0329400 | 0.3642770  | 0.0086490  |
| C      | 2.8771900 | 1.6303380  | 0.5252940  |
| C      | 2.1963250 | 1.3393720  | -0.8151520 |
| C      | 2.1609000 | -0.1373620 | -1.2920350 |
| C      | 1.9580540 | -1.1166590 | -0.1216620 |
| C      | 2.9664200 | -0.9733020 | 1.0174310  |
| C      | 4.4219630 | -1.3579930 | 0.7352370  |
| O      | 0.8938500 | 1.8865370  | -0.7823650 |
| O      | 3.2221900 | -0.5162610 | -2.1157960 |
| O      | 0.7003210 | -0.9150800 | 0.5226570  |
| O      | 2.8702140 | 0.3583550  | 1.5629250  |
| O      | 5.0978180 | -0.5881930 | -0.2279550 |
| H      | 2.2560500 | 2.3193400  | 1.1117510  |
| H      | 2.7629570 | 1.9061970  | -1.5604860 |
| H      | 0.3147930 | 1.2703140  | -0.3125360 |
| H      | 1.2686960 | -0.1958110 | -1.9171560 |
| H      | 4.0511210 | -0.5450620 | -1.6045300 |
| H      | 2.0203920 | -2.1404730 | -0.5163910 |
| H      | 2.6239880 | -1.6380940 | 1.8192740  |
| H      | 4.9572120 | -1.3229810 | 1.6949630  |
| H      | 4.4356360 | -2.3963350 | 0.3889920  |
| H      | 3.8895570 | 0.8981520  | 1.5593160  |

|   |            |            |            |
|---|------------|------------|------------|
| H | -1.1141900 | 1.9853870  | -1.8670890 |
| C | -0.4501940 | -1.3563480 | -0.1229140 |
| C | -1.5262200 | -1.5066880 | 0.9473990  |
| C | -2.8762370 | -1.7521240 | 0.3001480  |
| C | -3.1875870 | -0.6534260 | -0.7039690 |
| C | -2.0566880 | -0.5721030 | -1.7240070 |
| C | -2.1958250 | 0.5959150  | -2.6929700 |
| O | -1.2582930 | -2.5952580 | 1.8013140  |
| O | -3.9117210 | -1.7624970 | 1.2557820  |
| O | -4.3749290 | -0.9337770 | -1.4022740 |
| O | -0.8225410 | -0.3727160 | -1.0518340 |
| O | -2.0519390 | 1.8349750  | -2.0437450 |
| H | -0.2683970 | -2.3201650 | -0.6330240 |
| H | -1.5665510 | -0.5626750 | 1.5077100  |
| H | -0.5009370 | -2.3733500 | 2.3509800  |
| H | -2.8448500 | -2.7151710 | -0.2368530 |
| H | -3.6953690 | -2.4200040 | 1.9255910  |
| H | -3.2563040 | 0.3094180  | -0.1741270 |
| H | -2.0331030 | -1.5144770 | -2.2956840 |
| H | -1.4549720 | 0.4795970  | -3.4944600 |
| H | -3.1950340 | 0.5646030  | -3.1339880 |
| H | -5.0654220 | -1.0987980 | -0.7511420 |
| C | -3.8914940 | 2.8328320  | 1.5012910  |
| C | -2.8215030 | 1.9999980  | 2.2047420  |
| H | -4.8724490 | 2.7061370  | 1.9666400  |
| H | -3.6364060 | 3.8969070  | 1.5322350  |



|   |            |           |           |
|---|------------|-----------|-----------|
| H | -3.9726230 | 2.5496620 | 0.4460760 |
| C | -1.4662800 | 2.1363020 | 1.5134360 |
| H | -2.7386030 | 2.3086600 | 3.2525990 |
| H | -3.1330030 | 0.9473370 | 2.2178840 |
| H | -0.6859060 | 1.5386480 | 1.9991290 |
| H | -1.5534890 | 1.8198310 | 0.4674620 |
| H | -1.1308210 | 3.1783210 | 1.5072850 |

$4c_3 - E = -1416.682103$  Hartree

| Symbol | X         | Y          | Z          |
|--------|-----------|------------|------------|
| O      | 4.4451490 | 1.6663290  | -0.2779300 |
| H      | 5.0378350 | -0.1949430 | 0.3529500  |
| C      | 3.3023860 | 1.8557970  | 0.0492630  |
| C      | 2.0858370 | 1.4207550  | -0.7555090 |
| C      | 2.0483280 | -0.0509710 | -1.2500230 |
| C      | 1.7874700 | -1.1722530 | -0.2096580 |
| C      | 2.7519960 | -1.3591230 | 0.9640060  |
| C      | 4.1384700 | -1.9131850 | 0.6439690  |
| O      | 0.9131790 | 1.8211710  | -0.0875260 |
| O      | 3.1385860 | -0.3617740 | -2.0640800 |
| O      | 0.5137900 | -1.0292650 | 0.4251910  |
| O      | 2.8397410 | -0.1173010 | 1.6445810  |
| O      | 4.9629380 | -1.0490580 | -0.0937070 |
| H      | 3.0428970 | 2.4388080  | 0.9552920  |
| H      | 2.1445790 | 2.0149850  | -1.6775840 |
| H      | 0.6472370 | 1.1201130  | 0.5229100  |

|   |            |            |            |
|---|------------|------------|------------|
| H | 1.1719510  | -0.0831490 | -1.9023130 |
| H | 3.9524250  | -0.3926220 | -1.5361300 |
| H | 1.7951910  | -2.1066560 | -0.7908830 |
| H | 2.2614560  | -2.1043950 | 1.6076070  |
| H | 4.6190530  | -2.1791750 | 1.5975350  |
| H | 4.0356860  | -2.8327270 | 0.0590930  |
| H | 3.0865650  | -0.2552130 | 2.5627980  |
| H | -1.1149330 | 2.1775680  | -1.0179090 |
| C | -0.6291080 | -1.2932660 | -0.3267330 |
| C | -1.7350520 | -1.6425920 | 0.6639900  |
| C | -3.0710190 | -1.7027260 | -0.0499130 |
| C | -3.3339860 | -0.3916450 | -0.7720560 |
| C | -2.1840610 | -0.0981350 | -1.7301790 |
| C | -2.2486400 | 1.3039370  | -2.3282520 |
| O | -1.5111960 | -2.9007280 | 1.2603370  |
| O | -4.1316140 | -1.9126790 | 0.8547410  |
| O | -4.5128490 | -0.4673260 | -1.5360830 |
| O | -0.9457330 | -0.1331450 | -1.0406480 |
| O | -2.0169150 | 2.2899610  | -1.3541240 |
| H | -0.4506610 | -2.1403720 | -1.0155010 |
| H | -1.7690500 | -0.8470900 | 1.4215310  |
| H | -0.7406820 | -2.8324950 | 1.8317620  |
| H | -3.0418670 | -2.5144540 | -0.7963310 |
| H | -3.9437780 | -2.7135630 | 1.3555730  |
| H | -3.3937440 | 0.4200790  | -0.0316830 |
| H | -2.2027100 | -0.8482110 | -2.5376920 |

|   |            |            |            |
|---|------------|------------|------------|
| H | -1.5149530 | 1.3713070  | -3.1433570 |
| H | -3.2462950 | 1.4701920  | -2.7411620 |
| H | -5.2211850 | -0.7558050 | -0.9505970 |
| C | -1.2850150 | 3.3365750  | 1.8567470  |
| C | -1.6234910 | 1.8539930  | 1.9922550  |
| H | -0.2526030 | 3.4834900  | 1.5298030  |
| H | -1.9417290 | 3.8051290  | 1.1169090  |
| H | -1.4239880 | 3.8562460  | 2.8106240  |
| C | -3.0650790 | 1.6345240  | 2.4466590  |
| H | -1.4775740 | 1.3671210  | 1.0206480  |
| H | -0.9323110 | 1.3732240  | 2.6980250  |
| H | -3.3274910 | 0.5729210  | 2.5110230  |
| H | -3.2355330 | 2.0826550  | 3.4309190  |
| H | -3.7586010 | 2.1074420  | 1.7427450  |

**TS4<sub>C3</sub>** –  $E = -1416.61615$  Hartree

| Symbol | X          | Y          | Z          |
|--------|------------|------------|------------|
| C      | -2.6972880 | 2.3803590  | -0.9942840 |
| C      | -2.3615180 | 1.0411450  | -0.9857130 |
| C      | -1.1115790 | 1.3093370  | 0.6319380  |
| C      | -0.6360400 | -0.1415230 | 0.8101980  |
| C      | -1.6622450 | -1.2764860 | 0.8492650  |
| C      | -1.0237430 | -2.5501730 | 1.4011290  |
| O      | -3.2899990 | 2.9282390  | 0.0109230  |
| O      | -1.7181190 | 0.5089970  | -2.0807740 |
| O      | -1.8086650 | 1.8556590  | 1.5334820  |

|   |            |            |            |
|---|------------|------------|------------|
| O | 0.2638540  | -0.4651360 | -0.2459710 |
| O | -2.7349340 | -0.8816860 | 1.6768470  |
| O | -0.5732160 | -2.3642270 | 2.7199450  |
| H | -2.3424640 | 3.0260630  | -1.8034260 |
| H | -2.9826960 | 0.3756920  | -0.3910280 |
| H | -0.3360040 | 1.8913470  | 0.1049630  |
| H | -0.0965960 | -0.1278980 | 1.7675310  |
| H | -1.9949560 | -1.4675710 | -0.1826670 |
| H | -3.4955830 | -1.4459110 | 1.5037940  |
| H | -0.8765950 | 0.1275810  | -1.7979190 |
| H | -2.7748560 | 2.5112710  | 0.8952020  |
| H | 2.6049990  | 2.9644810  | -0.3252130 |
| H | -1.2962190 | -1.9662180 | 3.2197880  |
| H | -1.7625540 | -3.3641200 | 1.3436570  |
| H | -0.1570190 | -2.8402010 | 0.7985780  |
| C | 1.6046490  | -0.5426100 | 0.1151850  |
| C | 2.3715530  | -1.1709490 | -1.0393330 |
| C | 3.8466620  | -1.1928460 | -0.6806320 |
| C | 4.3243440  | 0.2048550  | -0.3207370 |
| C | 3.4384990  | 0.7958740  | 0.7752820  |
| C | 3.7560320  | 2.2555580  | 1.0549690  |
| O | 1.9737670  | -2.5038960 | -1.2658750 |
| O | 4.6409310  | -1.6514530 | -1.7491870 |
| O | 5.6407070  | 0.1719030  | 0.1729630  |
| O | 2.0735620  | 0.7541300  | 0.3686330  |
| O | 3.5296170  | 3.0622360  | -0.0762150 |

|   |            |            |            |
|---|------------|------------|------------|
| H | 1.7087820  | -1.1639860 | 1.0242840  |
| H | 2.2219880  | -0.5488600 | -1.9341180 |
| H | 1.0779150  | -2.5073810 | -1.6158880 |
| H | 3.9791910  | -1.8439910 | 0.1994170  |
| H | 4.3329660  | -2.5290320 | -1.9988840 |
| H | 4.2527560  | 0.8462520  | -1.2113840 |
| H | 3.5760280  | 0.2099040  | 1.6981960  |
| H | 3.1535130  | 2.5907370  | 1.9095200  |
| H | 4.8137720  | 2.3443990  | 1.3107360  |
| H | 6.1865170  | -0.2809750 | -0.4787710 |
| C | -5.4258390 | -0.5408240 | -2.1479940 |
| C | -5.3084800 | -1.1176980 | -0.7390830 |
| H | -5.1189890 | -1.2640640 | -2.9077150 |
| H | -6.4593220 | -0.2468550 | -2.3558910 |
| H | -4.7981980 | 0.3491610  | -2.2587880 |
| C | -5.7267150 | -0.1127520 | 0.3332290  |
| H | -5.9237560 | -2.0208970 | -0.6594020 |
| H | -4.2708530 | -1.4433440 | -0.5755100 |
| H | -5.6734000 | -0.5324570 | 1.3427580  |
| H | -5.0979830 | 0.7839580  | 0.3119630  |
| H | -6.7601820 | 0.2071760  | 0.1675250  |

$5c_3 - E = -1187.673543$  Hartree

| Symbol | X          | Y          | Z          |
|--------|------------|------------|------------|
| C      | -1.8272580 | -1.4809920 | -1.0758280 |
| C      | -2.1908710 | -0.0750590 | -0.5807680 |

|   |            |            |            |
|---|------------|------------|------------|
| C | -3.5292300 | -0.1587540 | 0.1474060  |
| C | -4.0290380 | 1.2067000  | 0.5984720  |
| O | -1.4883080 | -2.3508560 | -0.3242590 |
| O | -1.2383780 | 0.4064960  | 0.3384670  |
| O | -4.4384910 | -0.7124370 | -0.7966800 |
| O | -4.2374720 | 2.0593540  | -0.5003090 |
| H | -1.9229590 | -1.6604550 | -2.1637860 |
| H | -2.2822140 | 0.6092610  | -1.4360550 |
| H | -3.3941150 | -0.8219700 | 1.0120630  |
| H | -5.1182630 | -1.2121010 | -0.3378800 |
| H | 1.3855840  | -2.2347480 | -1.1806660 |
| H | -4.8063380 | 1.5917830  | -1.1223370 |
| H | -4.9547120 | 1.0710190  | 1.1780660  |
| H | -3.2877570 | 1.6824590  | 1.2448810  |
| C | -0.1042730 | 0.9370720  | -0.2641560 |
| C | 0.8525760  | 1.3556310  | 0.8431600  |
| C | 2.1641800  | 1.7956330  | 0.2233050  |
| C | 2.7228420  | 0.6818860  | -0.6456860 |
| C | 1.6936370  | 0.2726190  | -1.6971990 |
| C | 2.1139290  | -0.9734610 | -2.4626490 |
| O | 0.3455560  | 2.4417250  | 1.5834420  |
| O | 3.1301560  | 2.0940170  | 1.2047950  |
| O | 3.8754230  | 1.1078090  | -1.3311440 |
| O | 0.4608440  | -0.0624740 | -1.0736130 |
| O | 2.2351690  | -2.0887070 | -1.6143390 |
| H | -0.3770040 | 1.8099220  | -0.8880220 |

|   |            |            |            |
|---|------------|------------|------------|
| H | 1.0309380  | 0.4832140  | 1.4865590  |
| H | -0.4373560 | 2.1491460  | 2.0600480  |
| H | 1.9799170  | 2.6797570  | -0.4098740 |
| H | 2.7534120  | 2.7451820  | 1.8063110  |
| H | 2.9392520  | -0.1898250 | -0.0099860 |
| H | 1.5525080  | 1.1094460  | -2.4002380 |
| H | 1.3829400  | -1.1584340 | -3.2621620 |
| H | 3.0929300  | -0.7992210 | -2.9140700 |
| H | 4.4881570  | 1.4604900  | -0.6768850 |
| C | -0.0224840 | -1.9177130 | 2.7739640  |
| C | 0.9891440  | -2.2558350 | 1.6828000  |
| H | -1.0440890 | -2.0310610 | 2.4021220  |
| H | 0.1068660  | -2.5672410 | 3.6460910  |
| H | 0.1007860  | -0.8832880 | 3.1182030  |
| C | 2.4354570  | -2.0613900 | 2.1305190  |
| H | 0.8374430  | -3.2909560 | 1.3569050  |
| H | 0.7799590  | -1.6312240 | 0.8076720  |
| H | 3.1368170  | -2.3129000 | 1.3292840  |
| H | 2.6233900  | -1.0221050 | 2.4284270  |
| H | 2.6662510  | -2.6935870 | 2.9943970  |

**TS5<sub>C3</sub> – E = -1187.61695 Hartree**

| Symbol | X         | Y          | Z          |
|--------|-----------|------------|------------|
| O      | 4.7151370 | 0.3055980  | -0.8670870 |
| O      | 2.7161070 | -2.2599530 | 0.6878460  |
| C      | 3.8163880 | -0.2254680 | -0.1463840 |

|   |            |            |            |
|---|------------|------------|------------|
| C | 3.5187490  | -1.7153630 | -0.3340660 |
| H | 4.2387950  | 1.5166860  | -1.1679320 |
| H | 3.1893970  | -2.2414480 | 1.5240450  |
| H | 3.6983230  | 0.0944970  | 0.9061210  |
| H | 4.4988630  | -2.2088040 | -0.3761450 |
| H | 3.0117380  | -1.9112000 | -1.2808910 |
| C | 2.4609960  | 1.8283590  | -0.5800820 |
| C | 2.0577290  | 0.5382270  | -0.8690770 |
| O | 3.5072050  | 2.3436220  | -1.1250460 |
| O | 1.0554350  | -0.0301110 | -0.1263630 |
| H | 1.9867260  | 2.3639200  | 0.2489740  |
| H | 2.2460750  | 0.1140440  | -1.8526770 |
| H | -1.9551450 | 2.5574380  | 0.2490170  |
| C | -0.1272980 | -0.3416140 | -0.7928680 |
| C | -0.8181800 | -1.4045360 | 0.0483820  |
| C | -2.1966080 | -1.6704780 | -0.5194530 |
| C | -2.9766980 | -0.3706670 | -0.6007420 |
| C | -2.1969000 | 0.6552280  | -1.4228780 |
| C | -2.8428790 | 2.0314330  | -1.3843490 |
| O | -0.0992660 | -2.6085710 | 0.0348670  |
| O | -2.9306590 | -2.5642360 | 0.2854810  |
| O | -4.2161900 | -0.5633860 | -1.2383920 |
| O | -0.8883450 | 0.8304910  | -0.8902290 |
| O | -2.8621630 | 2.5540540  | -0.0765620 |
| H | 0.0932850  | -0.7385610 | -1.8015750 |
| H | -0.9192420 | -1.0031140 | 1.0684080  |



|   |            |            |            |
|---|------------|------------|------------|
| H | 0.7859820  | -2.4624830 | 0.4045570  |
| H | -2.0866950 | -2.0804500 | -1.5377380 |
| H | -2.3930120 | -3.3529770 | 0.4165180  |
| H | -3.1136540 | 0.0272370  | 0.4165120  |
| H | -2.1410300 | 0.3038820  | -2.4657910 |
| H | -2.2998540 | 2.6966200  | -2.0689380 |
| H | -3.8793180 | 1.9480850  | -1.7173550 |
| H | -4.6597550 | -1.2945880 | -0.7950140 |
| C | 0.7546190  | 0.6116560  | 3.0587860  |
| C | -0.4242570 | 1.4372970  | 2.5480970  |
| H | 1.7036890  | 0.9687060  | 2.6459490  |
| H | 0.8208950  | 0.6556840  | 4.1507250  |
| H | 0.6476260  | -0.4402260 | 2.7702090  |
| C | -1.7618540 | 0.9657910  | 3.1159670  |
| H | -0.2719810 | 2.4917290  | 2.8073780  |
| H | -0.4451970 | 1.3791540  | 1.4538830  |
| H | -2.5980580 | 1.5393840  | 2.7056650  |
| H | -1.9386300 | -0.0914820 | 2.8862840  |
| H | -1.7807490 | 1.0689920  | 4.2056830  |

**TS6<sub>C3</sub>** –  $E = -1416.625514$  Hartree

| Symbol | X          | Y          | Z          |
|--------|------------|------------|------------|
| O      | -3.4605090 | 1.0760240  | -1.2652550 |
| H      | -3.9230360 | -2.1635590 | -0.6282500 |
| C      | -3.2268650 | 0.4951410  | -0.1471750 |
| C      | -1.8300400 | 0.1561300  | 0.0029590  |

|   |            |            |            |
|---|------------|------------|------------|
| C | -1.3675970 | -0.8189120 | 1.0971560  |
| C | -0.7413930 | -2.1283340 | 0.5547850  |
| C | -1.5790220 | -2.9652310 | -0.4209120 |
| C | -2.8653210 | -3.5610240 | 0.1466920  |
| O | -1.1737150 | 0.4214880  | -1.0903360 |
| O | -2.4053450 | -1.0795420 | 2.0035400  |
| O | 0.4727770  | -1.9283680 | -0.1509490 |
| O | -1.9599870 | -2.2419120 | -1.5685670 |
| O | -3.8885390 | -2.5825580 | 0.2427440  |
| H | -4.0118940 | 0.3870910  | 0.5927460  |
| H | -2.1125420 | 1.1836470  | 0.6771270  |
| H | -2.4969960 | 0.9711090  | -1.6830830 |
| H | -0.5866250 | -0.3233650 | 1.6730770  |
| H | -3.1072870 | -1.5667510 | 1.5387350  |
| H | -0.5489820 | -2.7404690 | 1.4508150  |
| H | -0.9251910 | -3.8053690 | -0.7012620 |
| H | -3.1953050 | -4.3723820 | -0.5116780 |
| H | -2.7045250 | -3.9684840 | 1.1482080  |
| H | -1.3433360 | -1.5061790 | -1.7196010 |
| H | 0.4605240  | 1.6561000  | -1.1012190 |
| C | 1.5037240  | -1.2290250 | 0.4690380  |
| C | 2.7743750  | -1.5515780 | -0.3082900 |
| C | 3.8973580  | -0.6425100 | 0.1499900  |
| C | 3.4894480  | 0.8070570  | -0.0498600 |
| C | 2.1959010  | 1.0864960  | 0.7082660  |
| C | 1.5518590  | 2.4116310  | 0.3093310  |

|   |            |            |            |
|---|------------|------------|------------|
| O | 3.1855280  | -2.8832120 | -0.0985390 |
| O | 5.0776630  | -0.8615690 | -0.5877740 |
| O | 4.4683220  | 1.6828630  | 0.4559520  |
| O | 1.2008110  | 0.1311450  | 0.3890220  |
| O | 1.1079020  | 2.3778130  | -1.0197980 |
| H | 1.6097600  | -1.5488930 | 1.5243790  |
| H | 2.5675260  | -1.3613460 | -1.3712110 |
| H | 2.5308990  | -3.4681070 | -0.4919240 |
| H | 4.0838660  | -0.8137990 | 1.2238260  |
| H | 5.2823570  | -1.8019930 | -0.5495540 |
| H | 3.3160950  | 0.9836640  | -1.1215320 |
| H | 2.4179720  | 1.0810400  | 1.7878730  |
| H | 0.7185050  | 2.6102470  | 1.0031770  |
| H | 2.2829250  | 3.2186790  | 0.4051250  |
| H | 5.3085210  | 1.4450210  | 0.0496170  |
| C | -3.0205430 | 3.9197980  | 0.6829230  |
| C | -1.8758020 | 3.8774990  | -0.3272230 |
| H | -3.8182240 | 3.2147820  | 0.4283110  |
| H | -2.6629790 | 3.6868590  | 1.6926530  |
| H | -3.4683050 | 4.9183930  | 0.7186060  |
| C | -0.8052220 | 4.9248020  | -0.0320740 |
| H | -1.4047870 | 2.8854900  | -0.3405020 |
| H | -2.2710030 | 4.0321750  | -1.3372300 |
| H | 0.0378930  | 4.8265580  | -0.7197640 |
| H | -1.2162000 | 5.9357730  | -0.1209300 |
| H | -0.4240510 | 4.8150570  | 0.9895210  |

$7C_3 - E = -1416.693755$  Hartree

| Symbol | X          | Y          | Z          |
|--------|------------|------------|------------|
| O      | -0.6418940 | 3.1958920  | 1.2172570  |
| H      | -4.6316730 | -0.1855300 | -0.3817540 |
| C      | -1.1896090 | 2.0931650  | 1.8878460  |
| C      | -1.5784910 | 1.0046630  | 0.9084360  |
| C      | -1.7643820 | -0.3939810 | 1.4936860  |
| C      | -1.6683840 | -1.5400020 | 0.4635160  |
| C      | -2.7990760 | -1.8078630 | -0.5441470 |
| C      | -4.1861880 | -1.9959130 | 0.0743500  |
| O      | -1.7666110 | 1.2989720  | -0.2500870 |
| O      | -2.9033540 | -0.4229720 | 2.3093230  |
| O      | -0.5086910 | -1.3754450 | -0.3393800 |
| O      | -2.9293090 | -0.8339630 | -1.5516050 |
| O      | -4.7602130 | -0.7414670 | 0.4001650  |
| H      | -2.0890610 | 2.3609300  | 2.4621850  |
| H      | -0.4532060 | 1.7052370  | 2.5950130  |
| H      | -1.0709050 | 3.2412950  | 0.3509310  |
| H      | -0.9174100 | -0.5390210 | 2.1733820  |
| H      | -3.6975700 | -0.3475030 | 1.7456710  |
| H      | -1.5780270 | -2.4623560 | 1.0599620  |
| H      | -2.5146730 | -2.7581510 | -1.0193200 |
| H      | -4.8221220 | -2.5142930 | -0.6517910 |
| H      | -4.1455910 | -2.5884690 | 0.9921020  |
| H      | -2.3153170 | -0.1042640 | -1.3800540 |

|   |            |            |            |
|---|------------|------------|------------|
| H | 1.2872320  | 2.7045540  | 0.7344190  |
| C | 0.7296480  | -1.3471860 | 0.2851140  |
| C | 1.7575380  | -1.7492580 | -0.7671710 |
| C | 3.1464290  | -1.6515130 | -0.1729890 |
| C | 3.3752620  | -0.2528520 | 0.3694960  |
| C | 2.2686810  | 0.1104390  | 1.3595390  |
| C | 2.3990570  | 1.5523740  | 1.8343290  |
| O | 1.5644470  | -3.0800530 | -1.1862070 |
| O | 4.1489090  | -1.9112920 | -1.1280210 |
| O | 4.5996630  | -0.1809710 | 1.0604030  |
| O | 0.9893390  | -0.0415450 | 0.7526660  |
| O | 2.2240260  | 2.4731370  | 0.7907340  |
| H | 0.7521480  | -2.0617160 | 1.1315970  |
| H | 1.6676550  | -1.0468660 | -1.6076080 |
| H | 0.7272660  | -3.1276620 | -1.6585630 |
| H | 3.2246070  | -2.3676400 | 0.6626090  |
| H | 3.9633300  | -2.7660380 | -1.5312270 |
| H | 3.3479320  | 0.4649940  | -0.4630020 |
| H | 2.3540360  | -0.5597710 | 2.2326090  |
| H | 1.6911900  | 1.7337900  | 2.6533270  |
| H | 3.4097210  | 1.6749430  | 2.2341970  |
| H | 5.2854300  | -0.5107710 | 0.4698520  |
| C | -1.1709370 | 2.6079210  | -3.4266630 |
| C | 0.0982170  | 2.7859430  | -2.5980410 |
| H | -1.6671390 | 3.5626590  | -3.6219120 |
| H | -0.9406500 | 2.1453780  | -4.3919790 |

|   |            |           |            |
|---|------------|-----------|------------|
| H | -1.8820350 | 1.9570650 | -2.9079280 |
| C | 0.8024510  | 1.4596870 | -2.3274800 |
| H | 0.7833220  | 3.4713710 | -3.1084840 |
| H | -0.1506390 | 3.2640310 | -1.6430010 |
| H | 1.6777530  | 1.5977830 | -1.6859040 |
| H | 0.1266600  | 0.7632650 | -1.8193960 |
| H | 1.1259440  | 0.9966730 | -3.2668480 |

**TS7<sub>C3</sub>** –  $E = -1416.633738$  Hartree

| Symbol | X          | Y          | Z          |
|--------|------------|------------|------------|
| O      | -3.6949850 | 2.6313560  | 0.5566520  |
| H      | -4.9880110 | -0.6661680 | -0.3822720 |
| C      | -3.4374800 | 1.4311090  | 1.2179950  |
| C      | -2.2771300 | 0.6945970  | 0.5761060  |
| C      | -1.8942970 | -0.6575690 | 1.1832880  |
| C      | -1.5100670 | -1.5805380 | 0.0048750  |
| C      | -2.4627940 | -1.2018460 | -1.1447410 |
| C      | -3.7927800 | -1.9432290 | -1.2207110 |
| O      | -1.3331110 | 1.4705410  | 0.0806280  |
| O      | -2.9137640 | -1.2265150 | 1.9584000  |
| O      | -0.2180390 | -1.3830010 | -0.5415370 |
| O      | -2.7406310 | 0.1897010  | -0.9895150 |
| O      | -4.6819840 | -1.5594540 | -0.1880850 |
| H      | -4.3479430 | 0.8292210  | 1.2316690  |
| H      | -3.1403650 | 1.5843940  | 2.2686890  |
| H      | -2.8377290 | 2.9706560  | 0.2620260  |

|   |            |            |            |
|---|------------|------------|------------|
| H | -1.0437430 | -0.4884480 | 1.8425220  |
| H | -3.6723920 | -1.4408890 | 1.3927240  |
| H | -1.6265840 | -2.6240530 | 0.3278600  |
| H | -1.9235710 | -1.3504210 | -2.0854780 |
| H | -4.2495070 | -1.7528340 | -2.1978800 |
| H | -3.6293160 | -3.0195790 | -1.1211190 |
| H | -1.8079160 | 0.8957150  | -0.9915430 |
| H | 0.6346280  | 2.0899930  | 0.6265140  |
| C | 0.8836710  | -1.3912410 | 0.3122830  |
| C | 2.1054790  | -1.6159800 | -0.5723690 |
| C | 3.3733990  | -1.3618090 | 0.2180410  |
| C | 3.3432870  | 0.0410550  | 0.8001570  |
| C | 2.0977250  | 0.2103900  | 1.6617680  |
| C | 1.8502540  | 1.6616090  | 2.0684430  |
| O | 2.1585510  | -2.9398240 | -1.0550140 |
| O | 4.5183770  | -1.4617380 | -0.5981230 |
| O | 4.4615980  | 0.2684700  | 1.6237500  |
| O | 0.9359110  | -0.1417510 | 0.9321650  |
| O | 1.4745990  | 2.4414790  | 0.9631270  |
| H | 0.7948290  | -2.2020030 | 1.0605250  |
| H | 2.0488580  | -0.8936990 | -1.3994450 |
| H | 1.4367760  | -3.0663810 | -1.6776820 |
| H | 3.4331400  | -2.0872590 | 1.0469840  |
| H | 4.5021750  | -2.3217720 | -1.0313310 |
| H | 3.3013880  | 0.7689660  | -0.0231040 |
| H | 2.2062310  | -0.4195950 | 2.5598480  |

|   |            |           |            |
|---|------------|-----------|------------|
| H | 1.0746670  | 1.6796020 | 2.8475420  |
| H | 2.7704220  | 2.0806850 | 2.4825020  |
| H | 5.2488100  | 0.0667220 | 1.1068160  |
| C | 2.5075710  | 1.9433240 | -2.3864930 |
| C | 1.0090310  | 1.6561540 | -2.3180630 |
| H | 3.1065620  | 1.0263220 | -2.4080930 |
| H | 2.7518460  | 2.5176960 | -3.2863870 |
| H | 2.8157750  | 2.5319570 | -1.5159760 |
| C | 0.1946120  | 2.9484790 | -2.3007120 |
| H | 0.7105420  | 1.0398540 | -3.1764060 |
| H | 0.7806250  | 1.0740620 | -1.4167530 |
| H | -0.8821770 | 2.7573010 | -2.2905220 |
| H | 0.4371260  | 3.5382010 | -1.4104830 |
| H | 0.4198010  | 3.5605950 | -3.1805210 |

$8c_3 - E = -1416.704393$  Hartree

| Symbol | X          | Y          | Z          |
|--------|------------|------------|------------|
| O      | -3.7477620 | 2.8244840  | -0.4948980 |
| H      | -5.0651710 | -0.9973190 | 0.2191690  |
| C      | -3.3990210 | 1.9894030  | 0.5766900  |
| C      | -2.4402260 | 0.8927070  | 0.1424370  |
| C      | -1.9612330 | -0.0272330 | 1.2825870  |
| C      | -1.5696880 | -1.2907700 | 0.4973150  |
| C      | -2.5886420 | -1.3080610 | -0.6584320 |
| C      | -3.7815990 | -2.2440740 | -0.4968810 |
| O      | -1.3657600 | 1.5465330  | -0.4821820 |



|   |            |            |            |
|---|------------|------------|------------|
| O | -2.9547950 | -0.3059900 | 2.2291890  |
| O | -0.2957360 | -1.2071440 | -0.1391030 |
| O | -3.0938590 | 0.0178530  | -0.7633200 |
| O | -4.6525190 | -1.8117280 | 0.5316010  |
| H | -4.3159100 | 1.5433860  | 0.9645610  |
| H | -2.9194580 | 2.5486960  | 1.3927050  |
| H | -2.9377610 | 3.0417630  | -0.9693980 |
| H | -1.1216350 | 0.4227900  | 1.8098420  |
| H | -3.6294350 | -0.8830720 | 1.8363450  |
| H | -1.6112280 | -2.1804270 | 1.1375100  |
| H | -2.0502680 | -1.5793350 | -1.5756640 |
| H | -4.3213000 | -2.2983470 | -1.4490140 |
| H | -3.4438260 | -3.2505220 | -0.2356340 |
| H | -0.6662340 | 0.9076530  | -0.6748020 |
| H | 1.0126720  | 2.6155620  | 0.1725070  |
| C | 0.8304050  | -1.0552800 | 0.6642290  |
| C | 2.0106510  | -1.6020350 | -0.1325350 |
| C | 3.3128230  | -1.2631100 | 0.5648220  |
| C | 3.4010170  | 0.2370510  | 0.7911180  |
| C | 2.1812940  | 0.7018930  | 1.5814970  |
| C | 2.1050330  | 2.2165470  | 1.7206610  |
| O | 1.9403990  | -3.0031320 | -0.2577850 |
| O | 4.4285260  | -1.6452050 | -0.2059180 |
| O | 4.5440980  | 0.5662390  | 1.5403760  |
| O | 0.9915070  | 0.3190630  | 0.9059110  |
| O | 1.8989880  | 2.8424550  | 0.4778980  |

|   |            |            |            |
|---|------------|------------|------------|
| H | 0.7142060  | -1.6054550 | 1.6156540  |
| H | 1.9986870  | -1.1148410 | -1.1183690 |
| H | 1.1915530  | -3.2221830 | -0.8207410 |
| H | 3.3363350  | -1.7677810 | 1.5452750  |
| H | 4.3513290  | -2.5851080 | -0.4014330 |
| H | 3.4040030  | 0.7476110  | -0.1846740 |
| H | 2.2173480  | 0.2453010  | 2.5841570  |
| H | 1.3038150  | 2.4673150  | 2.4285310  |
| H | 3.0537270  | 2.5814280  | 2.1202050  |
| H | 5.3046460  | 0.1686900  | 1.1027340  |
| C | 0.2019980  | 0.1137170  | -3.2079460 |
| C | 1.1401630  | 1.1357620  | -2.5685420 |
| H | -0.8244600 | 0.2197450  | -2.8415590 |
| H | 0.1815340  | 0.2384310  | -4.2952590 |
| H | 0.5325960  | -0.9107440 | -2.9991350 |
| C | 2.5644840  | 1.0511060  | -3.1115270 |
| H | 0.7442960  | 2.1449370  | -2.7276530 |
| H | 1.1765650  | 0.9896710  | -1.4815510 |
| H | 3.2115020  | 1.7973530  | -2.6424050 |
| H | 3.0019440  | 0.0627480  | -2.9259190 |
| H | 2.5804630  | 1.2188820  | -4.1930820 |

**TS8c3** –  $E = -1416.585514$  Hartree

| Symbol | X          | Y          | Z         |
|--------|------------|------------|-----------|
| O      | -2.9866170 | 2.2180010  | 0.9107960 |
| H      | -4.7721700 | -3.3495540 | 0.8907570 |

|   |            |            |            |
|---|------------|------------|------------|
| C | -3.0880010 | 1.4991730  | -0.2813910 |
| C | -2.6535060 | 0.1327260  | -0.1739250 |
| C | -1.7733590 | -0.4686860 | 0.8898750  |
| C | -1.3545650 | -1.8193860 | 0.2480410  |
| C | -2.4155160 | -2.0279070 | -0.8475730 |
| C | -3.4650250 | -3.0743730 | -0.5535640 |
| O | -0.8177640 | 1.0304090  | -1.3334450 |
| O | -2.5479260 | -0.6695570 | 2.0449570  |
| O | -0.1119720 | -1.8942950 | -0.4027040 |
| O | -3.0985490 | -0.7533780 | -0.9976580 |
| O | -4.0089890 | -2.7923520 | 0.7216570  |
| H | -2.1638140 | 1.6841730  | -1.0286440 |
| H | -4.0471600 | 1.6115320  | -0.7930860 |
| H | -2.3457210 | 2.9250350  | 0.7884010  |
| H | -0.9373800 | 0.1792920  | 1.1275910  |
| H | -3.2292710 | -1.3314580 | 1.8618100  |
| H | -1.4181570 | -2.5908850 | 1.0274990  |
| H | -1.9206280 | -2.2296610 | -1.7993820 |
| H | -4.2385950 | -3.0375350 | -1.3288140 |
| H | -2.9846830 | -4.0609540 | -0.5723210 |
| H | -0.5059230 | 0.7704580  | -2.2059280 |
| H | 0.7444810  | 1.6560120  | -0.8042190 |
| C | 1.0371960  | -1.6317830 | 0.3517890  |
| C | 2.2054450  | -2.1298070 | -0.4902270 |
| C | 3.5085890  | -1.6365410 | 0.1011950  |
| C | 3.4906530  | -0.1191760 | 0.1305600  |

|   |            |            |            |
|---|------------|------------|------------|
| C | 2.2988570  | 0.3769820  | 0.9435300  |
| C | 2.0115530  | 1.8571090  | 0.6919940  |
| O | 2.2496840  | -3.5398350 | -0.5284700 |
| O | 4.6149790  | -2.0407400 | -0.6734230 |
| O | 4.6513770  | 0.3877460  | 0.7467540  |
| O | 1.0920470  | -0.2603060 | 0.5621960  |
| O | 1.6241140  | 2.0836570  | -0.6288720 |
| H | 0.9973820  | -2.1829790 | 1.3112350  |
| H | 2.0886730  | -1.7089400 | -1.4991970 |
| H | 1.4844630  | -3.8533140 | -1.0188060 |
| H | 3.6083560  | -2.0149250 | 1.1325780  |
| H | 4.5609860  | -2.9948500 | -0.7927650 |
| H | 3.3947070  | 0.2545800  | -0.8991250 |
| H | 2.5134620  | 0.2014690  | 2.0097300  |
| H | 1.2352340  | 2.1786190  | 1.4066410  |
| H | 2.9202160  | 2.4330840  | 0.8957110  |
| H | 5.4098120  | 0.0202360  | 0.2810680  |
| C | 0.6893550  | 5.0160560  | 0.5057800  |
| C | -0.5632100 | 4.3183200  | -0.0179690 |
| H | 0.7898840  | 4.9116270  | 1.5903300  |
| H | 1.5752190  | 4.5823480  | 0.0330490  |
| H | 0.6626040  | 6.0854470  | 0.2716790  |
| C | -0.6935310 | 4.4298060  | -1.5340110 |
| H | -0.5088040 | 3.2531630  | 0.2448760  |
| H | -1.4484710 | 4.7536550  | 0.4680800  |
| H | -1.6005920 | 3.9416010  | -1.9020930 |

|   |            |           |            |
|---|------------|-----------|------------|
| H | -0.7183600 | 5.4800430 | -1.8443250 |
| H | 0.1615780  | 3.9428170 | -2.0112590 |

$9C_3 - E = -1340.263271$  Hartree

| Symbol | X          | Y          | Z          |
|--------|------------|------------|------------|
| O      | 3.6977940  | 0.5027030  | 2.4265730  |
| H      | 3.8181440  | -0.5274960 | -1.5025480 |
| C      | 2.7328370  | 0.9919000  | 1.6016890  |
| C      | 2.0711740  | 0.2626200  | 0.7109540  |
| C      | 0.9911800  | 0.6941310  | -0.2503690 |
| C      | 0.4076520  | -0.6739900 | -0.6749510 |
| C      | 1.5558520  | -1.6617510 | -0.4393820 |
| C      | 2.4527550  | -1.9060390 | -1.6462640 |
| O      | 1.4311750  | 1.4656780  | -1.3396590 |
| O      | -0.6661290 | -1.0679920 | 0.1640270  |
| O      | 2.3350150  | -1.0944300 | 0.6128690  |
| O      | 3.0802640  | -0.7196720 | -2.0938470 |
| H      | 2.5530870  | 2.0521420  | 1.7146650  |
| H      | 3.7391620  | -0.4544650 | 2.3118120  |
| H      | 0.2170280  | 1.2776020  | 0.2452150  |
| H      | 2.0877580  | 0.9476970  | -1.8265050 |
| H      | 0.0813890  | -0.6405140 | -1.7213940 |
| H      | 1.1549310  | -2.6176050 | -0.0878460 |
| H      | 3.2052460  | -2.6586810 | -1.3821990 |
| H      | 1.8582920  | -2.2944510 | -2.4788260 |
| H      | -2.2391570 | 2.7118900  | 0.9702980  |

|   |            |            |            |
|---|------------|------------|------------|
| C | -1.9282320 | -0.7192310 | -0.2861510 |
| C | -2.9473140 | -1.3936150 | 0.6222610  |
| C | -4.3388470 | -0.9921560 | 0.1703540  |
| C | -4.4676260 | 0.5219170  | 0.1402040  |
| C | -3.3478030 | 1.1257370  | -0.7065770 |
| C | -3.3149200 | 2.6434650  | -0.6326730 |
| O | -2.8675180 | -2.7977990 | 0.5476260  |
| O | -5.3372590 | -1.4880270 | 1.0322580  |
| O | -5.6910230 | 0.9098450  | -0.4369530 |
| O | -2.0840180 | 0.6761330  | -0.2323820 |
| O | -3.0731240 | 3.0945400  | 0.6791220  |
| H | -2.0656450 | -1.0608620 | -1.3306260 |
| H | -2.7747630 | -1.0367400 | 1.6479650  |
| H | -2.0010890 | -3.0676320 | 0.8677820  |
| H | -4.4964270 | -1.3755370 | -0.8517260 |
| H | -5.2271060 | -2.4423740 | 1.0999540  |
| H | -4.3763440 | 0.9074050  | 1.1660940  |
| H | -3.4908150 | 0.8171740  | -1.7550740 |
| H | -2.5483440 | 3.0124170  | -1.3269610 |
| H | -4.2881080 | 3.0348420  | -0.9359020 |
| H | -6.3946820 | 0.4567820  | 0.0397430  |
| C | 6.8140560  | -0.1356870 | 0.8266120  |
| C | 5.6885890  | 0.0932090  | -0.1796700 |
| H | 7.0242120  | -1.1996340 | 0.9656840  |
| H | 7.7363280  | 0.3489800  | 0.4914500  |
| H | 6.5434900  | 0.2913090  | 1.7972030  |

|   |           |            |            |
|---|-----------|------------|------------|
| C | 5.3929520 | 1.5777280  | -0.3832110 |
| H | 5.9593920 | -0.3697300 | -1.1383580 |
| H | 4.7856860 | -0.4141800 | 0.1881310  |
| H | 4.5507440 | 1.7486830  | -1.0614770 |
| H | 5.1442500 | 2.0454760  | 0.5740970  |
| H | 6.2680990 | 2.0902520  | -0.7946800 |

**TS9<sub>C3</sub>** –  $E = -1340.201781$  Hartree

| Symbol | X          | Y          | Z          |
|--------|------------|------------|------------|
| O      | -3.5393930 | -2.6100730 | -0.0646620 |
| H      | -4.8879490 | 0.6545350  | -0.8620090 |
| C      | -3.7271320 | -1.6381850 | 0.7302830  |
| C      | -2.9406790 | -0.5042420 | 0.6049250  |
| C      | -1.9102740 | -0.5058240 | -0.3576050 |
| C      | -1.5079790 | 0.9447000  | -0.5496230 |
| C      | -2.6630560 | 1.6999980  | 0.1401720  |
| C      | -3.7170900 | 2.1953350  | -0.8434860 |
| O      | -2.6218580 | -1.1373620 | -1.8737340 |
| O      | -0.3072920 | 1.2343950  | 0.1384010  |
| O      | -3.2718020 | 0.7860150  | 1.0475970  |
| O      | -4.3503540 | 1.1172390  | -1.5156810 |
| H      | -4.5397310 | -1.6866300 | 1.4668640  |
| H      | -3.0471830 | -1.9139950 | -1.2948620 |
| H      | -1.1417870 | -1.2678550 | -0.3804870 |
| H      | -3.3297380 | -0.5003100 | -2.0785570 |
| H      | -1.4086630 | 1.2058860  | -1.6117630 |

|   |            |            |            |
|---|------------|------------|------------|
| H | -2.2625190 | 2.5440770  | 0.7097870  |
| H | -4.4618550 | 2.7918850  | -0.3052160 |
| H | -3.2571280 | 2.8259320  | -1.6103420 |
| H | 1.2589380  | -2.5584840 | -0.0687320 |
| C | 0.8702760  | 1.0422000  | -0.5724710 |
| C | 2.0050720  | 1.5103970  | 0.3290430  |
| C | 3.3288270  | 1.2295640  | -0.3533520 |
| C | 3.4243370  | -0.2464580 | -0.6988480 |
| C | 2.2198180  | -0.6687880 | -1.5383990 |
| C | 2.1615520  | -2.1748760 | -1.7417780 |
| O | 1.9351330  | 2.8940060  | 0.5787600  |
| O | 4.4225210  | 1.5442340  | 0.4764710  |
| O | 4.5782710  | -0.5137820 | -1.4573740 |
| O | 1.0093840  | -0.3211870 | -0.8757980 |
| O | 2.0566120  | -2.8608290 | -0.5168320 |
| H | 0.8508170  | 1.6301370  | -1.5107410 |
| H | 1.9474680  | 0.9314420  | 1.2629260  |
| H | 1.1418220  | 3.0696290  | 1.0946200  |
| H | 3.3785660  | 1.8151590  | -1.2867700 |
| H | 4.3283780  | 2.4590020  | 0.7628630  |
| H | 3.4200830  | -0.8292490 | 0.2348740  |
| H | 2.2748840  | -0.1670690 | -2.5179820 |
| H | 1.3166090  | -2.4088070 | -2.4032990 |
| H | 3.0872330  | -2.5044670 | -2.2177520 |
| H | 5.3342690  | -0.1716760 | -0.9683030 |
| C | -0.2877300 | -0.0281700 | 3.1814120  |



|   |            |            |           |
|---|------------|------------|-----------|
| C | 0.3332910  | -1.2128260 | 2.4452640 |
| H | -1.2586530 | 0.2442980  | 2.7574240 |
| H | -0.4277780 | -0.2589710 | 4.2425740 |
| H | 0.3647270  | 0.8515520  | 3.1207250 |
| C | 1.7046870  | -1.5962060 | 2.9984680 |
| H | -0.3449060 | -2.0726990 | 2.5007490 |
| H | 0.4273340  | -0.9570480 | 1.3840490 |
| H | 2.1503360  | -2.4272530 | 2.4438990 |
| H | 2.3998480  | -0.7496850 | 2.9437050 |
| H | 1.6332970  | -1.8903090 | 4.0505330 |

**10c3** –  $E = -1263.845867$  Hartree

| Symbol | X          | Y          | Z          |
|--------|------------|------------|------------|
| O      | -3.4299480 | -3.0438970 | -0.7352250 |
| H      | -4.6604030 | 1.4387670  | -1.5219510 |
| C      | -3.8280150 | -2.0676320 | -0.1599750 |
| C      | -3.1187800 | -0.7658170 | -0.1982140 |
| C      | -1.9669890 | -0.4587190 | -0.7903500 |
| C      | -1.6376610 | 0.9728920  | -0.4646040 |
| C      | -2.8622990 | 1.4044110  | 0.3726630  |
| C      | -3.6700370 | 2.5222080  | -0.2576700 |
| O      | -0.4830990 | 1.1206690  | 0.3548760  |
| O      | -3.7152530 | 0.2488910  | 0.4895300  |
| O      | -4.0669240 | 2.1951180  | -1.5676870 |
| H      | -4.7531090 | -2.0790310 | 0.4474740  |
| H      | -1.3634130 | -1.1274620 | -1.3822150 |

|   |            |            |            |
|---|------------|------------|------------|
| H | -1.5202340 | 1.5942830  | -1.3632290 |
| H | -2.5305120 | 1.6815400  | 1.3787920  |
| H | -4.5338840 | 2.7533000  | 0.3787240  |
| H | -3.0453970 | 3.4182000  | -0.3272600 |
| H | 1.1539160  | -2.4072170 | -0.7748840 |
| C | 0.7326190  | 1.1562960  | -0.3085430 |
| C | 1.7991010  | 1.3810320  | 0.7560840  |
| C | 3.1714900  | 1.3027950  | 0.1189820  |
| C | 3.3294390  | -0.0283480 | -0.5945030 |
| C | 2.1968500  | -0.2171370 | -1.6019130 |
| C | 2.1916750  | -1.6134450 | -2.2054700 |
| O | 1.6769170  | 2.6491030  | 1.3556940  |
| O | 4.2003220  | 1.3979440  | 1.0768520  |
| O | 4.5403710  | -0.0781420 | -1.3085760 |
| O | 0.9357460  | -0.0722230 | -0.9614580 |
| O | 1.9847990  | -2.6010270 | -1.2240030 |
| H | 0.7455140  | 1.9757370  | -1.0532240 |
| H | 1.6965880  | 0.5756880  | 1.4997190  |
| H | 0.8290950  | 2.6889820  | 1.8092990  |
| H | 3.2656890  | 2.1141520  | -0.6221060 |
| H | 4.0636240  | 2.2049840  | 1.5844100  |
| H | 3.2743790  | -0.8381760 | 0.1490230  |
| H | 2.3072510  | 0.5305740  | -2.4039310 |
| H | 1.4181400  | -1.6589080 | -2.9843510 |
| H | 3.1643280  | -1.8078770 | -2.6618870 |
| H | 5.2497980  | 0.1383880  | -0.6940560 |

|   |            |            |           |
|---|------------|------------|-----------|
| C | 1.3117500  | -2.4063610 | 2.3721160 |
| C | -0.0284130 | -1.9559380 | 1.7936270 |
| H | 1.8928410  | -2.9832700 | 1.6467460 |
| H | 1.9178170  | -1.5436500 | 2.6732610 |
| H | 1.1660330  | -3.0282200 | 3.2612570 |
| C | -0.8354930 | -1.1107730 | 2.7757610 |
| H | 0.1409280  | -1.3653860 | 0.8870100 |
| H | -0.6155680 | -2.8324780 | 1.4934970 |
| H | -1.7878690 | -0.7884740 | 2.3419690 |
| H | -1.0510380 | -1.6695840 | 3.6922960 |
| H | -0.2793970 | -0.2091310 | 3.0576490 |

**TS10<sub>C3</sub>** –  $E = -1263.755124$  Hartree

| Symbol | X          | Y          | Z          |
|--------|------------|------------|------------|
| O      | -5.6851790 | -1.8409150 | -0.6811390 |
| H      | -3.5076450 | 3.1180110  | -0.1752260 |
| C      | -5.3393210 | -1.0026010 | 0.1015170  |
| C      | -3.9583150 | -0.4392710 | 0.0741450  |
| C      | -2.8952620 | -0.7826770 | -0.7340740 |
| C      | -1.8415580 | 0.0268120  | -0.3191630 |
| C      | -2.3068740 | 0.8392890  | 0.7996460  |
| C      | -2.0541120 | 2.3276860  | 0.8591300  |
| O      | -0.7148520 | -1.0220480 | 1.4287230  |
| O      | -3.6941980 | 0.5157670  | 0.9353450  |
| O      | -2.5571900 | 3.0108050  | -0.2644780 |
| H      | -6.0043820 | -0.5911620 | 0.8810230  |

|   |            |            |            |
|---|------------|------------|------------|
| H | -2.9143560 | -1.5374880 | -1.5028410 |
| H | -0.8629220 | 0.1240250  | -0.7639230 |
| H | -1.7044770 | 0.2426690  | 1.6066350  |
| H | -2.4636780 | 2.7224830  | 1.7956540  |
| H | -0.9700990 | 2.4645030  | 0.8759820  |
| H | 1.0293750  | 2.2255660  | -0.6798030 |
| C | 0.5816130  | -0.7370780 | 1.5300520  |
| C | 1.4400950  | -1.6999840 | 0.6995690  |
| C | 2.9057260  | -1.3504920 | 0.8393350  |
| C | 3.1434450  | 0.0988550  | 0.4518300  |
| C | 2.1916930  | 1.0143300  | 1.2243910  |
| C | 2.2893260  | 2.4612860  | 0.7699090  |
| O | 1.2560490  | -3.0253850 | 1.1355680  |
| O | 3.7321460  | -2.1480800 | 0.0133550  |
| O | 4.4620080  | 0.4935230  | 0.7568880  |
| O | 0.8482080  | 0.6058880  | 1.0357730  |
| O | 1.9011360  | 2.6219580  | -0.5773210 |
| H | 0.9411300  | -0.7621530 | 2.5824850  |
| H | 1.1317040  | -1.5925130 | -0.3540680 |
| H | 0.3078140  | -3.1293480 | 1.2862380  |
| H | 3.1942030  | -1.4800410 | 1.8953890  |
| H | 3.5355670  | -3.0710200 | 0.2057950  |
| H | 2.9479260  | 0.2145060  | -0.6245080 |
| H | 2.4583730  | 0.9639230  | 2.2935250  |
| H | 1.6693510  | 3.0820630  | 1.4327990  |
| H | 3.3265030  | 2.7939400  | 0.8464710  |

|   |            |            |            |
|---|------------|------------|------------|
| H | 5.0535510  | -0.1632570 | 0.3741460  |
| C | 2.2615620  | 0.5643740  | -3.3388370 |
| C | 0.9109070  | 0.2118350  | -2.7218450 |
| H | 2.6157280  | 1.5350940  | -2.9828540 |
| H | 3.0102690  | -0.1898820 | -3.0722050 |
| H | 2.1949780  | 0.5944340  | -4.4310790 |
| C | 0.4262690  | -1.1761940 | -3.1340160 |
| H | 1.0084630  | 0.2525240  | -1.6295460 |
| H | 0.1664390  | 0.9684210  | -3.0025900 |
| H | -0.5280780 | -1.4385970 | -2.6642300 |
| H | 0.2907720  | -1.2366880 | -4.2183740 |
| H | 1.1573090  | -1.9391230 | -2.8461500 |

### In the Presence of Benzene (Bz)

The Cartesian coordinates for all the stable structures in the presence of Bz reported in this work are listed below including computed absolute energies.

$1_{\text{Bz}} - E = -1529.795633$  Hartree

| Symbol | X          | Y          | Z          |
|--------|------------|------------|------------|
| C      | -1.0767110 | 1.0976700  | 0.4678650  |
| C      | -0.6941700 | -0.3626670 | 0.6373170  |
| C      | -1.9168060 | -1.2807580 | 0.4607770  |
| C      | -1.5871730 | -2.6979950 | 0.9141390  |
| O      | -0.7063670 | 1.7982340  | -0.4327740 |
| O      | 0.2726370  | -0.7662830 | -0.2980740 |
| O      | -2.9857130 | -0.8272260 | 1.2681940  |
| O      | -1.3396840 | -2.7354150 | 2.2994930  |

|   |            |            |            |
|---|------------|------------|------------|
| H | -1.7587230 | 1.4785050  | 1.2537230  |
| H | -0.3311220 | -0.4909900 | 1.6695190  |
| H | -2.1896420 | -1.2886180 | -0.6020940 |
| H | -3.6432290 | -0.3692220 | 0.7317860  |
| H | 1.8999210  | 2.8310600  | -0.1417670 |
| H | -2.1141070 | -2.3629800 | 2.7363790  |
| H | -2.4250610 | -3.3545260 | 0.6432040  |
| H | -0.6829310 | -3.0556210 | 0.4147330  |
| C | 1.5846050  | -0.6760800 | 0.1494240  |
| C | 2.4884110  | -1.1084280 | -0.9954990 |
| C | 3.9326720  | -0.9198220 | -0.5738990 |
| C | 4.1661590  | 0.5227580  | -0.1574120 |
| C | 3.1710510  | 0.9203540  | 0.9318320  |
| C | 3.1989770  | 2.4132640  | 1.2271480  |
| O | 2.3118620  | -2.4695940 | -1.3159980 |
| O | 4.8291840  | -1.2129260 | -1.6211630 |
| O | 5.4594800  | 0.6901040  | 0.3724830  |
| O | 1.8424380  | 0.6528270  | 0.5080670  |
| O | 2.7691730  | 3.1618610  | 0.1174510  |
| H | 1.7311990  | -1.3350150 | 1.0280580  |
| H | 2.2694410  | -0.4624820 | -1.8576980 |
| H | 1.4173110  | -2.5887530 | -1.6493940 |
| H | 4.1351810  | -1.5724200 | 0.2918520  |
| H | 4.6371540  | -2.1021320 | -1.9374120 |
| H | 4.0099120  | 1.1746210  | -1.0294100 |
| H | 3.4065730  | 0.3540480  | 1.8475550  |

|   |            |            |            |
|---|------------|------------|------------|
| H | 2.5691350  | 2.6089790  | 2.1061430  |
| H | 4.2238180  | 2.7155910  | 1.4534100  |
| H | 6.0847740  | 0.3466320  | -0.2745990 |
| C | -5.1399030 | 1.7161570  | 0.2339730  |
| C | -4.0358860 | 1.9385770  | -0.5857680 |
| C | -3.7169970 | 1.0254570  | -1.5886350 |
| C | -4.5054450 | -0.1081690 | -1.7730990 |
| C | -5.6061710 | -0.3347040 | -0.9492380 |
| C | -5.9235700 | 0.5780960  | 0.0544410  |
| H | -5.3863500 | 2.4253460  | 1.0162360  |
| H | -3.4125520 | 2.8148180  | -0.4431690 |
| H | -2.8470560 | 1.1971720  | -2.2133740 |
| H | -4.2594580 | -0.8180150 | -2.5557060 |
| H | -6.2145550 | -1.2214780 | -1.0874140 |
| H | -6.7779650 | 0.4005650  | 0.6978100  |

**TS1<sub>Bz</sub>** –  $E = -1529.71051$  Hartree

| Symbol | X          | Y          | Z          |
|--------|------------|------------|------------|
| C      | -1.0767110 | 1.0976700  | 0.4678650  |
| C      | -0.6941700 | -0.3626670 | 0.6373170  |
| C      | -1.9168060 | -1.2807580 | 0.4607770  |
| C      | -1.5871730 | -2.6979950 | 0.9141390  |
| O      | -0.7063670 | 1.7982340  | -0.4327740 |
| O      | 0.2726370  | -0.7662830 | -0.2980740 |
| O      | -2.9857130 | -0.8272260 | 1.2681940  |
| O      | -1.3396840 | -2.7354150 | 2.2994930  |

|   |            |            |            |
|---|------------|------------|------------|
| H | -1.7587230 | 1.4785050  | 1.2537230  |
| H | -0.3311220 | -0.4909900 | 1.6695190  |
| H | -2.1896420 | -1.2886180 | -0.6020940 |
| H | -3.6432290 | -0.3692220 | 0.7317860  |
| H | 1.8999210  | 2.8310600  | -0.1417670 |
| H | -2.1141070 | -2.3629800 | 2.7363790  |
| H | -2.4250610 | -3.3545260 | 0.6432040  |
| H | -0.6829310 | -3.0556210 | 0.4147330  |
| C | 1.5846050  | -0.6760800 | 0.1494240  |
| C | 2.4884110  | -1.1084280 | -0.9954990 |
| C | 3.9326720  | -0.9198220 | -0.5738990 |
| C | 4.1661590  | 0.5227580  | -0.1574120 |
| C | 3.1710510  | 0.9203540  | 0.9318320  |
| C | 3.1989770  | 2.4132640  | 1.2271480  |
| O | 2.3118620  | -2.4695940 | -1.3159980 |
| O | 4.8291840  | -1.2129260 | -1.6211630 |
| O | 5.4594800  | 0.6901040  | 0.3724830  |
| O | 1.8424380  | 0.6528270  | 0.5080670  |
| O | 2.7691730  | 3.1618610  | 0.1174510  |
| H | 1.7311990  | -1.3350150 | 1.0280580  |
| H | 2.2694410  | -0.4624820 | -1.8576980 |
| H | 1.4173110  | -2.5887530 | -1.6493940 |
| H | 4.1351810  | -1.5724200 | 0.2918520  |
| H | 4.6371540  | -2.1021320 | -1.9374120 |
| H | 4.0099120  | 1.1746210  | -1.0294100 |
| H | 3.4065730  | 0.3540480  | 1.8475550  |



|   |            |            |            |
|---|------------|------------|------------|
| H | 2.5691350  | 2.6089790  | 2.1061430  |
| H | 4.2238180  | 2.7155910  | 1.4534100  |
| H | 6.0847740  | 0.3466320  | -0.2745990 |
| C | -5.1399030 | 1.7161570  | 0.2339730  |
| C | -4.0358860 | 1.9385770  | -0.5857680 |
| C | -3.7169970 | 1.0254570  | -1.5886350 |
| C | -4.5054450 | -0.1081690 | -1.7730990 |
| C | -5.6061710 | -0.3347040 | -0.9492380 |
| C | -5.9235700 | 0.5780960  | 0.0544410  |
| H | -5.3863500 | 2.4253460  | 1.0162360  |
| H | -3.4125520 | 2.8148180  | -0.4431690 |
| H | -2.8470560 | 1.1971720  | -2.2133740 |
| H | -4.2594580 | -0.8180150 | -2.5557060 |
| H | -6.2145550 | -1.2214780 | -1.0874140 |
| H | -6.7779650 | 0.4005650  | 0.6978100  |

$2_{Bz} - E = -1453.375697$  Hartree

| Symbol | X          | Y          | Z          |
|--------|------------|------------|------------|
| C      | -1.0767110 | 1.0976700  | 0.4678650  |
| C      | -0.6941700 | -0.3626670 | 0.6373170  |
| C      | -1.9168060 | -1.2807580 | 0.4607770  |
| C      | -1.5871730 | -2.6979950 | 0.9141390  |
| O      | -0.7063670 | 1.7982340  | -0.4327740 |
| O      | 0.2726370  | -0.7662830 | -0.2980740 |
| O      | -2.9857130 | -0.8272260 | 1.2681940  |
| O      | -1.3396840 | -2.7354150 | 2.2994930  |

|   |            |            |            |
|---|------------|------------|------------|
| H | -1.7587230 | 1.4785050  | 1.2537230  |
| H | -0.3311220 | -0.4909900 | 1.6695190  |
| H | -2.1896420 | -1.2886180 | -0.6020940 |
| H | -3.6432290 | -0.3692220 | 0.7317860  |
| H | 1.8999210  | 2.8310600  | -0.1417670 |
| H | -2.1141070 | -2.3629800 | 2.7363790  |
| H | -2.4250610 | -3.3545260 | 0.6432040  |
| H | -0.6829310 | -3.0556210 | 0.4147330  |
| C | 1.5846050  | -0.6760800 | 0.1494240  |
| C | 2.4884110  | -1.1084280 | -0.9954990 |
| C | 3.9326720  | -0.9198220 | -0.5738990 |
| C | 4.1661590  | 0.5227580  | -0.1574120 |
| C | 3.1710510  | 0.9203540  | 0.9318320  |
| C | 3.1989770  | 2.4132640  | 1.2271480  |
| O | 2.3118620  | -2.4695940 | -1.3159980 |
| O | 4.8291840  | -1.2129260 | -1.6211630 |
| O | 5.4594800  | 0.6901040  | 0.3724830  |
| O | 1.8424380  | 0.6528270  | 0.5080670  |
| O | 2.7691730  | 3.1618610  | 0.1174510  |
| H | 1.7311990  | -1.3350150 | 1.0280580  |
| H | 2.2694410  | -0.4624820 | -1.8576980 |
| H | 1.4173110  | -2.5887530 | -1.6493940 |
| H | 4.1351810  | -1.5724200 | 0.2918520  |
| H | 4.6371540  | -2.1021320 | -1.9374120 |
| H | 4.0099120  | 1.1746210  | -1.0294100 |
| H | 3.4065730  | 0.3540480  | 1.8475550  |

|   |            |            |            |
|---|------------|------------|------------|
| H | 2.5691350  | 2.6089790  | 2.1061430  |
| H | 4.2238180  | 2.7155910  | 1.4534100  |
| H | 6.0847740  | 0.3466320  | -0.2745990 |
| C | -5.1399030 | 1.7161570  | 0.2339730  |
| C | -4.0358860 | 1.9385770  | -0.5857680 |
| C | -3.7169970 | 1.0254570  | -1.5886350 |
| C | -4.5054450 | -0.1081690 | -1.7730990 |
| C | -5.6061710 | -0.3347040 | -0.9492380 |
| C | -5.9235700 | 0.5780960  | 0.0544410  |
| H | -5.3863500 | 2.4253460  | 1.0162360  |
| H | -3.4125520 | 2.8148180  | -0.4431690 |
| H | -2.8470560 | 1.1971720  | -2.2133740 |
| H | -4.2594580 | -0.8180150 | -2.5557060 |
| H | -6.2145550 | -1.2214780 | -1.0874140 |
| H | -6.7779650 | 0.4005650  | 0.6978100  |

**TS2<sub>Bz</sub>** –  $E = -1453.282849$  Hartree

| Symbol | X          | Y          | Z          |
|--------|------------|------------|------------|
| C      | -1.0767110 | 1.0976700  | 0.4678650  |
| C      | -0.6941700 | -0.3626670 | 0.6373170  |
| C      | -1.9168060 | -1.2807580 | 0.4607770  |
| C      | -1.5871730 | -2.6979950 | 0.9141390  |
| O      | -0.7063670 | 1.7982340  | -0.4327740 |
| O      | 0.2726370  | -0.7662830 | -0.2980740 |
| O      | -2.9857130 | -0.8272260 | 1.2681940  |
| O      | -1.3396840 | -2.7354150 | 2.2994930  |

|   |            |            |            |
|---|------------|------------|------------|
| H | -1.7587230 | 1.4785050  | 1.2537230  |
| H | -0.3311220 | -0.4909900 | 1.6695190  |
| H | -2.1896420 | -1.2886180 | -0.6020940 |
| H | -3.6432290 | -0.3692220 | 0.7317860  |
| H | 1.8999210  | 2.8310600  | -0.1417670 |
| H | -2.1141070 | -2.3629800 | 2.7363790  |
| H | -2.4250610 | -3.3545260 | 0.6432040  |
| H | -0.6829310 | -3.0556210 | 0.4147330  |
| C | 1.5846050  | -0.6760800 | 0.1494240  |
| C | 2.4884110  | -1.1084280 | -0.9954990 |
| C | 3.9326720  | -0.9198220 | -0.5738990 |
| C | 4.1661590  | 0.5227580  | -0.1574120 |
| C | 3.1710510  | 0.9203540  | 0.9318320  |
| C | 3.1989770  | 2.4132640  | 1.2271480  |
| O | 2.3118620  | -2.4695940 | -1.3159980 |
| O | 4.8291840  | -1.2129260 | -1.6211630 |
| O | 5.4594800  | 0.6901040  | 0.3724830  |
| O | 1.8424380  | 0.6528270  | 0.5080670  |
| O | 2.7691730  | 3.1618610  | 0.1174510  |
| H | 1.7311990  | -1.3350150 | 1.0280580  |
| H | 2.2694410  | -0.4624820 | -1.8576980 |
| H | 1.4173110  | -2.5887530 | -1.6493940 |
| H | 4.1351810  | -1.5724200 | 0.2918520  |
| H | 4.6371540  | -2.1021320 | -1.9374120 |
| H | 4.0099120  | 1.1746210  | -1.0294100 |
| H | 3.4065730  | 0.3540480  | 1.8475550  |

|   |            |            |            |
|---|------------|------------|------------|
| H | 2.5691350  | 2.6089790  | 2.1061430  |
| H | 4.2238180  | 2.7155910  | 1.4534100  |
| H | 6.0847740  | 0.3466320  | -0.2745990 |
| C | -5.1399030 | 1.7161570  | 0.2339730  |
| C | -4.0358860 | 1.9385770  | -0.5857680 |
| C | -3.7169970 | 1.0254570  | -1.5886350 |
| C | -4.5054450 | -0.1081690 | -1.7730990 |
| C | -5.6061710 | -0.3347040 | -0.9492380 |
| C | -5.9235700 | 0.5780960  | 0.0544410  |
| H | -5.3863500 | 2.4253460  | 1.0162360  |
| H | -3.4125520 | 2.8148180  | -0.4431690 |
| H | -2.8470560 | 1.1971720  | -2.2133740 |
| H | -4.2594580 | -0.8180150 | -2.5557060 |
| H | -6.2145550 | -1.2214780 | -1.0874140 |
| H | -6.7779650 | 0.4005650  | 0.6978100  |

**TS3<sub>Bz</sub>** –  $E = -1529.709729$  Hartree

| Symbol | X          | Y          | Z          |
|--------|------------|------------|------------|
| C      | -1.0767110 | 1.0976700  | 0.4678650  |
| C      | -0.6941700 | -0.3626670 | 0.6373170  |
| C      | -1.9168060 | -1.2807580 | 0.4607770  |
| C      | -1.5871730 | -2.6979950 | 0.9141390  |
| O      | -0.7063670 | 1.7982340  | -0.4327740 |
| O      | 0.2726370  | -0.7662830 | -0.2980740 |
| O      | -2.9857130 | -0.8272260 | 1.2681940  |
| O      | -1.3396840 | -2.7354150 | 2.2994930  |

|   |            |            |            |
|---|------------|------------|------------|
| H | -1.7587230 | 1.4785050  | 1.2537230  |
| H | -0.3311220 | -0.4909900 | 1.6695190  |
| H | -2.1896420 | -1.2886180 | -0.6020940 |
| H | -3.6432290 | -0.3692220 | 0.7317860  |
| H | 1.8999210  | 2.8310600  | -0.1417670 |
| H | -2.1141070 | -2.3629800 | 2.7363790  |
| H | -2.4250610 | -3.3545260 | 0.6432040  |
| H | -0.6829310 | -3.0556210 | 0.4147330  |
| C | 1.5846050  | -0.6760800 | 0.1494240  |
| C | 2.4884110  | -1.1084280 | -0.9954990 |
| C | 3.9326720  | -0.9198220 | -0.5738990 |
| C | 4.1661590  | 0.5227580  | -0.1574120 |
| C | 3.1710510  | 0.9203540  | 0.9318320  |
| C | 3.1989770  | 2.4132640  | 1.2271480  |
| O | 2.3118620  | -2.4695940 | -1.3159980 |
| O | 4.8291840  | -1.2129260 | -1.6211630 |
| O | 5.4594800  | 0.6901040  | 0.3724830  |
| O | 1.8424380  | 0.6528270  | 0.5080670  |
| O | 2.7691730  | 3.1618610  | 0.1174510  |
| H | 1.7311990  | -1.3350150 | 1.0280580  |
| H | 2.2694410  | -0.4624820 | -1.8576980 |
| H | 1.4173110  | -2.5887530 | -1.6493940 |
| H | 4.1351810  | -1.5724200 | 0.2918520  |
| H | 4.6371540  | -2.1021320 | -1.9374120 |
| H | 4.0099120  | 1.1746210  | -1.0294100 |
| H | 3.4065730  | 0.3540480  | 1.8475550  |

|   |            |            |            |
|---|------------|------------|------------|
| H | 2.5691350  | 2.6089790  | 2.1061430  |
| H | 4.2238180  | 2.7155910  | 1.4534100  |
| H | 6.0847740  | 0.3466320  | -0.2745990 |
| C | -5.1399030 | 1.7161570  | 0.2339730  |
| C | -4.0358860 | 1.9385770  | -0.5857680 |
| C | -3.7169970 | 1.0254570  | -1.5886350 |
| C | -4.5054450 | -0.1081690 | -1.7730990 |
| C | -5.6061710 | -0.3347040 | -0.9492380 |
| C | -5.9235700 | 0.5780960  | 0.0544410  |
| H | -5.3863500 | 2.4253460  | 1.0162360  |
| H | -3.4125520 | 2.8148180  | -0.4431690 |
| H | -2.8470560 | 1.1971720  | -2.2133740 |
| H | -4.2594580 | -0.8180150 | -2.5557060 |
| H | -6.2145550 | -1.2214780 | -1.0874140 |
| H | -6.7779650 | 0.4005650  | 0.6978100  |

$4_{Bz} - E = -1529.768972$  Hartree

| Symbol | X          | Y          | Z          |
|--------|------------|------------|------------|
| O      | -3.7974860 | -1.2525620 | -0.3694400 |
| H      | -3.3140430 | -3.1993910 | -0.0009190 |
| C      | -2.8736370 | -0.6891470 | -0.8991780 |
| C      | -1.6861230 | -0.0737150 | -0.1780690 |
| C      | -1.0268250 | -0.9022810 | 0.9569930  |
| C      | -0.1149200 | -2.0954920 | 0.5619610  |
| C      | -0.7009620 | -3.2500800 | -0.2544410 |
| C      | -1.6805240 | -4.1829830 | 0.4549470  |

|   |            |            |            |
|---|------------|------------|------------|
| O | -0.7664120 | 0.4109670  | -1.1311690 |
| O | -1.9405340 | -1.2767380 | 1.9445420  |
| O | 1.0148160  | -1.6822670 | -0.2162920 |
| O | -1.2799420 | -2.6903600 | -1.4235830 |
| O | -2.9177110 | -3.6077100 | 0.7808850  |
| H | -2.8476550 | -0.5173800 | -1.9947220 |
| H | -2.1063460 | 0.8037630  | 0.3315350  |
| H | -0.1520470 | -0.3008100 | -1.3505310 |
| H | -0.3505970 | -0.1946000 | 1.4401320  |
| H | -2.5752930 | -1.9172660 | 1.5885040  |
| H | 0.2418570  | -2.5129640 | 1.5155870  |
| H | 0.1689660  | -3.8663040 | -0.5268130 |
| H | -1.8262340 | -5.0624100 | -0.1912580 |
| H | -1.2336160 | -4.5334990 | 1.3907530  |
| H | -1.3409480 | -3.3546800 | -2.1151810 |
| H | 0.5347420  | 2.0575960  | -0.6648820 |
| C | 2.0104890  | -0.9333670 | 0.4066950  |
| C | 3.2536340  | -1.0448020 | -0.4696800 |
| C | 4.3112700  | -0.0699740 | 0.0112120  |
| C | 3.7489220  | 1.3421980  | 0.0120270  |
| C | 2.4947150  | 1.3867630  | 0.8783600  |
| C | 1.7136210  | 2.6904220  | 0.7418730  |
| O | 3.8093630  | -2.3387230 | -0.4225740 |
| O | 5.4447400  | -0.0793940 | -0.8258110 |
| O | 4.6728050  | 2.2521390  | 0.5571760  |
| O | 1.5741260  | 0.3922590  | 0.4677330  |



|   |            |            |            |
|---|------------|------------|------------|
| O | 1.1331400  | 2.8110560  | -0.5306300 |
| H | 2.2134390  | -1.3278930 | 1.4201820  |
| H | 2.9605160  | -0.7757710 | -1.4953880 |
| H | 3.1842570  | -2.9519500 | -0.8205880 |
| H | 4.5986300  | -0.3342130 | 1.0428830  |
| H | 5.7624510  | -0.9863500 | -0.8894710 |
| H | 3.4780030  | 1.6210520  | -1.0172910 |
| H | 2.7915610  | 1.2377520  | 1.9291970  |
| H | 0.9472490  | 2.7147750  | 1.5314180  |
| H | 2.3924480  | 3.5346100  | 0.8848400  |
| H | 5.5024480  | 2.1472570  | 0.0792560  |
| C | -3.2756360 | 2.6339200  | -1.5050020 |
| C | -4.2897980 | 2.2830330  | -0.6174080 |
| C | -4.1410530 | 2.5332160  | 0.7444690  |
| C | -2.9795840 | 3.1392020  | 1.2160780  |
| C | -1.9645860 | 3.4895310  | 0.3272030  |
| C | -2.1117940 | 3.2349970  | -1.0329860 |
| H | -3.3873280 | 2.4311090  | -2.5649540 |
| H | -5.1911630 | 1.8028840  | -0.9831240 |
| H | -4.9243860 | 2.2469040  | 1.4371430  |
| H | -2.8626420 | 3.3314890  | 2.2770910  |
| H | -1.0529340 | 3.9553800  | 0.6851740  |
| H | -1.3098300 | 3.4929270  | -1.7155930 |

**TS4<sub>Bz</sub>** –  $E = -1529.718973$  Hartree

| Symbol | X | Y | Z |
|--------|---|---|---|
|--------|---|---|---|

|   |            |            |            |
|---|------------|------------|------------|
| C | -2.3907610 | 2.4293700  | -0.9108940 |
| C | -1.9538020 | 1.1185630  | -0.9944720 |
| C | -0.9903320 | 1.2932010  | 0.8123390  |
| C | -0.2948100 | -0.0667900 | 0.9177050  |
| C | -1.2085640 | -1.2801570 | 1.1094970  |
| C | -0.3973510 | -2.5492140 | 1.3398750  |
| O | -3.1428450 | 2.8679630  | 0.0419810  |
| O | -1.1671250 | 0.8081620  | -2.0781790 |
| O | -1.9250770 | 1.5470010  | 1.6446830  |
| O | 0.5411300  | -0.2718810 | -0.2128080 |
| O | -2.0139190 | -1.1236620 | 2.2541340  |
| O | 0.4230520  | -2.4311560 | 2.4798120  |
| H | -1.9967420 | 3.1665610  | -1.6150660 |
| H | -2.5892740 | 0.3324060  | -0.5884390 |
| H | -0.2725250 | 2.0847970  | 0.5436850  |
| H | 0.3283440  | 0.0293030  | 1.8190120  |
| H | -1.8172390 | -1.4215190 | 0.2017440  |
| H | -2.3279900 | -0.2053850 | 2.2755420  |
| H | -0.3909150 | 0.3337240  | -1.7540500 |
| H | -2.8525650 | 2.3150330  | 0.9044900  |
| H | 3.0273870  | 3.0049770  | -0.0460700 |
| H | -0.1515780 | -2.1743960 | 3.2108610  |
| H | -1.1021990 | -3.3849520 | 1.4444830  |
| H | 0.2578380  | -2.7559190 | 0.4892420  |
| C | 1.8913960  | -0.4562480 | 0.0762250  |
| C | 2.5775050  | -0.9777250 | -1.1780490 |

|   |            |            |            |
|---|------------|------------|------------|
| C | 4.0641240  | -1.1006390 | -0.8937860 |
| C | 4.6207350  | 0.2266900  | -0.4048110 |
| C | 3.8100890  | 0.7267790  | 0.7903180  |
| C | 4.2044690  | 2.1325000  | 1.2117040  |
| O | 2.1131530  | -2.2590840 | -1.5380440 |
| O | 4.7903420  | -1.4682510 | -2.0429630 |
| O | 5.9542840  | 0.0852480  | 0.0187480  |
| O | 2.4291670  | 0.7869390  | 0.4451110  |
| O | 3.9586470  | 3.0688140  | 0.1895540  |
| H | 2.0023840  | -1.1758660 | 0.9065750  |
| H | 2.4198820  | -0.2505710 | -1.9888800 |
| H | 1.2075850  | -2.1897180 | -1.8546200 |
| H | 4.2025710  | -1.8517700 | -0.0985360 |
| H | 4.4307950  | -2.2983050 | -2.3733250 |
| H | 4.5408370  | 0.9660810  | -1.2152850 |
| H | 3.9596380  | 0.0363080  | 1.6356240  |
| H | 3.6581210  | 2.3926230  | 2.1282740  |
| H | 5.2759110  | 2.1526250  | 1.4208710  |
| H | 6.4490930  | -0.3174210 | -0.7029320 |
| C | -4.4852660 | -1.5315720 | 0.1961390  |
| C | -4.9477210 | -0.3515370 | 0.7752050  |
| C | -5.4107790 | 0.6844730  | -0.0304660 |
| C | -5.3999990 | 0.5461100  | -1.4159390 |
| C | -4.9319080 | -0.6290410 | -1.9956810 |
| C | -4.4778500 | -1.6703640 | -1.1891160 |
| H | -4.1207770 | -2.3315470 | 0.8320750  |

|   |            |            |            |
|---|------------|------------|------------|
| H | -4.9479880 | -0.2456140 | 1.8548850  |
| H | -5.7661400 | 1.6051820  | 0.4181510  |
| H | -5.7508270 | 1.3583720  | -2.0432840 |
| H | -4.9179190 | -0.7338520 | -3.0748980 |
| H | -4.1172430 | -2.5882830 | -1.6411300 |

$5Bz - E = -1300.76219$  Hartree

| Symbol | X          | Y          | Z          |
|--------|------------|------------|------------|
| C      | -1.0767110 | 1.0976700  | 0.4678650  |
| C      | -0.6941700 | -0.3626670 | 0.6373170  |
| C      | -1.9168060 | -1.2807580 | 0.4607770  |
| C      | -1.5871730 | -2.6979950 | 0.9141390  |
| O      | -0.7063670 | 1.7982340  | -0.4327740 |
| O      | 0.2726370  | -0.7662830 | -0.2980740 |
| O      | -2.9857130 | -0.8272260 | 1.2681940  |
| O      | -1.3396840 | -2.7354150 | 2.2994930  |
| H      | -1.7587230 | 1.4785050  | 1.2537230  |
| H      | -0.3311220 | -0.4909900 | 1.6695190  |
| H      | -2.1896420 | -1.2886180 | -0.6020940 |
| H      | -3.6432290 | -0.3692220 | 0.7317860  |
| H      | 1.8999210  | 2.8310600  | -0.1417670 |
| H      | -2.1141070 | -2.3629800 | 2.7363790  |
| H      | -2.4250610 | -3.3545260 | 0.6432040  |
| H      | -0.6829310 | -3.0556210 | 0.4147330  |
| C      | 1.5846050  | -0.6760800 | 0.1494240  |
| C      | 2.4884110  | -1.1084280 | -0.9954990 |

|   |            |            |            |
|---|------------|------------|------------|
| C | 3.9326720  | -0.9198220 | -0.5738990 |
| C | 4.1661590  | 0.5227580  | -0.1574120 |
| C | 3.1710510  | 0.9203540  | 0.9318320  |
| C | 3.1989770  | 2.4132640  | 1.2271480  |
| O | 2.3118620  | -2.4695940 | -1.3159980 |
| O | 4.8291840  | -1.2129260 | -1.6211630 |
| O | 5.4594800  | 0.6901040  | 0.3724830  |
| O | 1.8424380  | 0.6528270  | 0.5080670  |
| O | 2.7691730  | 3.1618610  | 0.1174510  |
| H | 1.7311990  | -1.3350150 | 1.0280580  |
| H | 2.2694410  | -0.4624820 | -1.8576980 |
| H | 1.4173110  | -2.5887530 | -1.6493940 |
| H | 4.1351810  | -1.5724200 | 0.2918520  |
| H | 4.6371540  | -2.1021320 | -1.9374120 |
| H | 4.0099120  | 1.1746210  | -1.0294100 |
| H | 3.4065730  | 0.3540480  | 1.8475550  |
| H | 2.5691350  | 2.6089790  | 2.1061430  |
| H | 4.2238180  | 2.7155910  | 1.4534100  |
| H | 6.0847740  | 0.3466320  | -0.2745990 |
| C | -5.1399030 | 1.7161570  | 0.2339730  |
| C | -4.0358860 | 1.9385770  | -0.5857680 |
| C | -3.7169970 | 1.0254570  | -1.5886350 |
| C | -4.5054450 | -0.1081690 | -1.7730990 |
| C | -5.6061710 | -0.3347040 | -0.9492380 |
| C | -5.9235700 | 0.5780960  | 0.0544410  |
| H | -5.3863500 | 2.4253460  | 1.0162360  |

|   |            |            |            |
|---|------------|------------|------------|
| H | -3.4125520 | 2.8148180  | -0.4431690 |
| H | -2.8470560 | 1.1971720  | -2.2133740 |
| H | -4.2594580 | -0.8180150 | -2.5557060 |
| H | -6.2145550 | -1.2214780 | -1.0874140 |
| H | -6.7779650 | 0.4005650  | 0.6978100  |

**TS5<sub>Bz</sub>** –  $E = -1300.705697$  Hartree

| Symbol | X          | Y          | Z          |
|--------|------------|------------|------------|
| O      | 2.6490090  | 2.3034360  | -1.1003150 |
| O      | 1.9145960  | -1.1204260 | -0.3901070 |
| C      | 2.1251880  | 1.3007830  | -0.5175720 |
| C      | 2.0091220  | -0.0302310 | -1.2720450 |
| H      | 1.9113330  | 3.3249250  | -0.7255750 |
| H      | 2.7791810  | -1.3064340 | -0.0029530 |
| H      | 2.3020150  | 1.1381130  | 0.5589630  |
| H      | 2.9014490  | -0.1006820 | -1.9057290 |
| H      | 1.1334640  | -0.0654440 | -1.9246340 |
| C      | 0.3988430  | 2.8703370  | 0.3370280  |
| C      | 0.1295640  | 1.7304380  | -0.3937090 |
| O      | 1.0886400  | 3.8350350  | -0.1661160 |
| O      | -0.4345440 | 0.6417490  | 0.2212640  |
| H      | 0.1788200  | 2.8869440  | 1.4089390  |
| H      | 0.0361020  | 1.7903930  | -1.4752840 |
| H      | -3.9497290 | 1.6862330  | 1.9509830  |
| C      | -1.6153960 | 0.1601890  | -0.3358730 |
| C      | -1.7447790 | -1.3020280 | 0.0676300  |

|   |            |            |            |
|---|------------|------------|------------|
| C | -3.0895780 | -1.8180480 | -0.4094510 |
| C | -4.2135290 | -0.9389940 | 0.1082440  |
| C | -3.9585600 | 0.5122780  | -0.2974850 |
| C | -4.9587480 | 1.4752370  | 0.3210400  |
| O | -0.7569360 | -2.0930450 | -0.5363960 |
| O | -3.3310520 | -3.1351320 | 0.0290630  |
| O | -5.4487000 | -1.3224770 | -0.4476760 |
| O | -2.6766360 | 0.9298770  | 0.1586590  |
| O | -4.8644310 | 1.4865190  | 1.7255360  |
| H | -1.5743740 | 0.2391660  | -1.4390970 |
| H | -1.6976120 | -1.3546850 | 1.1658670  |
| H | 0.1269960  | -1.8111400 | -0.2503160 |
| H | -3.1003590 | -1.7806940 | -1.5121490 |
| H | -2.5741460 | -3.6724940 | -0.2295130 |
| H | -4.2413640 | -0.9973640 | 1.2061640  |
| H | -4.0145440 | 0.5856720  | -1.3959280 |
| H | -4.7875760 | 2.4771210  | -0.0953910 |
| H | -5.9695620 | 1.1521410  | 0.0638820  |
| H | -5.5489250 | -2.2697880 | -0.3044540 |
| C | 5.2922260  | 0.0553820  | -0.4176490 |
| C | 4.9779040  | 0.4513680  | 0.8797570  |
| C | 4.6972280  | -0.5048690 | 1.8524280  |
| C | 4.7314530  | -1.8596040 | 1.5285980  |
| C | 5.0469290  | -2.2569310 | 0.2303960  |
| C | 5.3275370  | -1.2985420 | -0.7422040 |
| H | 5.4942430  | 0.8052760  | -1.1747740 |

|   |           |            |            |
|---|-----------|------------|------------|
| H | 4.9417360 | 1.5074870  | 1.1247360  |
| H | 4.4487190 | -0.1958720 | 2.8617010  |
| H | 4.5107440 | -2.6044900 | 2.2849120  |
| H | 5.0712280 | -3.3107550 | -0.0236020 |
| H | 5.5701700 | -1.6085050 | -1.7528510 |

**TS6<sub>Bz</sub>** –  $E = -1529.713676$  Hartree

| Symbol | X          | Y          | Z          |
|--------|------------|------------|------------|
| O      | -3.0149130 | -0.6909280 | 0.8976610  |
| H      | -0.0151480 | -5.8445170 | 0.9749300  |
| C      | -2.5864440 | -1.3353160 | -0.2588520 |
| C      | -1.2985260 | -1.9477970 | -0.1233860 |
| C      | -0.2674020 | -1.6756190 | 0.9364300  |
| C      | 1.0260040  | -2.2481030 | 0.2963170  |
| C      | 0.4793740  | -3.2008260 | -0.7844530 |
| C      | 0.5990940  | -4.6764370 | -0.4840510 |
| O      | -0.6884450 | -0.0286930 | -1.3637430 |
| O      | -0.6290330 | -2.4002470 | 2.0865820  |
| O      | 1.8935040  | -1.3678830 | -0.3731420 |
| O      | -0.9349430 | -2.8922960 | -0.9228590 |
| O      | 0.0488100  | -4.9029570 | 0.7995210  |
| H      | -2.0921040 | -0.5839040 | -1.0508550 |
| H      | -3.3338220 | -1.9707270 | -0.7434370 |
| H      | -3.2477940 | 0.2186670  | 0.6728670  |
| H      | -0.2143000 | -0.6230390 | 1.1829240  |
| H      | -0.5668860 | -3.3479640 | 1.9018100  |



|   |            |            |            |
|---|------------|------------|------------|
| H | 1.5723510  | -2.7918270 | 1.0792190  |
| H | 0.9421810  | -2.9605650 | -1.7435680 |
| H | 0.0593710  | -5.2451050 | -1.2497280 |
| H | 1.6613290  | -4.9505240 | -0.5157340 |
| H | -0.2004800 | 0.0661720  | -2.1872250 |
| H | -0.3031240 | 1.5182050  | -0.6777900 |
| C | 2.4534900  | -0.3136960 | 0.3569910  |
| C | 3.5214020  | 0.2891830  | -0.5476960 |
| C | 3.9813220  | 1.6169120  | 0.0162500  |
| C | 2.7884040  | 2.5510310  | 0.1144750  |
| C | 1.7113830  | 1.9304220  | 0.9981590  |
| C | 0.3569010  | 2.6200670  | 0.8358410  |
| O | 4.6482020  | -0.5539120 | -0.6521790 |
| O | 4.9405690  | 2.2281220  | -0.8168720 |
| O | 3.1538410  | 3.7766790  | 0.7043780  |
| O | 1.4365560  | 0.5896900  | 0.6347700  |
| O | -0.1435280 | 2.4786530  | -0.4586650 |
| H | 2.9129890  | -0.6956620 | 1.2891620  |
| H | 3.0608440  | 0.4595880  | -1.5314900 |
| H | 4.3861060  | -1.3527820 | -1.1185680 |
| H | 4.3990450  | 1.4605980  | 1.0252080  |
| H | 5.6437740  | 1.5899880  | -0.9774610 |
| H | 2.3738200  | 2.7054880  | -0.8922700 |
| H | 2.0493980  | 1.9906090  | 2.0450500  |
| H | -0.3271050 | 2.1910880  | 1.5872600  |
| H | 0.4771690  | 3.6872620  | 1.0494480  |

|   |            |           |            |
|---|------------|-----------|------------|
| H | 3.8862660  | 4.1362230 | 0.1930460  |
| C | -4.4687640 | 2.4764670 | 0.9522010  |
| C | -3.3263810 | 2.6091740 | 0.1642610  |
| C | -3.2720650 | 2.0099750 | -1.0929030 |
| C | -4.3638400 | 1.2808250 | -1.5595810 |
| C | -5.5041270 | 1.1456880 | -0.7716870 |
| C | -5.5566810 | 1.7427020 | 0.4852690  |
| H | -4.5078250 | 2.9378430 | 1.9330310  |
| H | -2.4646510 | 3.1651300 | 0.5160630  |
| H | -2.3662630 | 2.0920540 | -1.6812180 |
| H | -4.3177960 | 0.8078360 | -2.5350500 |
| H | -6.3500390 | 0.5710410 | -1.1333630 |
| H | -6.4411460 | 1.6310750 | 1.1026190  |

$7Bz - E = -1529.783708$  Hartree

| Symbol | X          | Y          | Z          |
|--------|------------|------------|------------|
| O      | -3.0149130 | -0.6909280 | 0.8976610  |
| H      | -0.0151480 | -5.8445170 | 0.9749300  |
| C      | -2.5864440 | -1.3353160 | -0.2588520 |
| C      | -1.2985260 | -1.9477970 | -0.1233860 |
| C      | -0.2674020 | -1.6756190 | 0.9364300  |
| C      | 1.0260040  | -2.2481030 | 0.2963170  |
| C      | 0.4793740  | -3.2008260 | -0.7844530 |
| C      | 0.5990940  | -4.6764370 | -0.4840510 |
| O      | -0.6884450 | -0.0286930 | -1.3637430 |
| O      | -0.6290330 | -2.4002470 | 2.0865820  |

|   |            |            |            |
|---|------------|------------|------------|
| O | 1.8935040  | -1.3678830 | -0.3731420 |
| O | -0.9349430 | -2.8922960 | -0.9228590 |
| O | 0.0488100  | -4.9029570 | 0.7995210  |
| H | -2.0921040 | -0.5839040 | -1.0508550 |
| H | -3.3338220 | -1.9707270 | -0.7434370 |
| H | -3.2477940 | 0.2186670  | 0.6728670  |
| H | -0.2143000 | -0.6230390 | 1.1829240  |
| H | -0.5668860 | -3.3479640 | 1.9018100  |
| H | 1.5723510  | -2.7918270 | 1.0792190  |
| H | 0.9421810  | -2.9605650 | -1.7435680 |
| H | 0.0593710  | -5.2451050 | -1.2497280 |
| H | 1.6613290  | -4.9505240 | -0.5157340 |
| H | -0.2004800 | 0.0661720  | -2.1872250 |
| H | -0.3031240 | 1.5182050  | -0.6777900 |
| C | 2.4534900  | -0.3136960 | 0.3569910  |
| C | 3.5214020  | 0.2891830  | -0.5476960 |
| C | 3.9813220  | 1.6169120  | 0.0162500  |
| C | 2.7884040  | 2.5510310  | 0.1144750  |
| C | 1.7113830  | 1.9304220  | 0.9981590  |
| C | 0.3569010  | 2.6200670  | 0.8358410  |
| O | 4.6482020  | -0.5539120 | -0.6521790 |
| O | 4.9405690  | 2.2281220  | -0.8168720 |
| O | 3.1538410  | 3.7766790  | 0.7043780  |
| O | 1.4365560  | 0.5896900  | 0.6347700  |
| O | -0.1435280 | 2.4786530  | -0.4586650 |
| H | 2.9129890  | -0.6956620 | 1.2891620  |

|   |            |            |            |
|---|------------|------------|------------|
| H | 3.0608440  | 0.4595880  | -1.5314900 |
| H | 4.3861060  | -1.3527820 | -1.1185680 |
| H | 4.3990450  | 1.4605980  | 1.0252080  |
| H | 5.6437740  | 1.5899880  | -0.9774610 |
| H | 2.3738200  | 2.7054880  | -0.8922700 |
| H | 2.0493980  | 1.9906090  | 2.0450500  |
| H | -0.3271050 | 2.1910880  | 1.5872600  |
| H | 0.4771690  | 3.6872620  | 1.0494480  |
| H | 3.8862660  | 4.1362230  | 0.1930460  |
| C | -4.4687640 | 2.4764670  | 0.9522010  |
| C | -3.3263810 | 2.6091740  | 0.1642610  |
| C | -3.2720650 | 2.0099750  | -1.0929030 |
| C | -4.3638400 | 1.2808250  | -1.5595810 |
| C | -5.5041270 | 1.1456880  | -0.7716870 |
| C | -5.5566810 | 1.7427020  | 0.4852690  |
| H | -4.5078250 | 2.9378430  | 1.9330310  |
| H | -2.4646510 | 3.1651300  | 0.5160630  |
| H | -2.3662630 | 2.0920540  | -1.6812180 |
| H | -4.3177960 | 0.8078360  | -2.5350500 |
| H | -6.3500390 | 0.5710410  | -1.1333630 |
| H | -6.4411460 | 1.6310750  | 1.1026190  |

**TS7<sub>Bz</sub>** –  $E = -1529.723703$  Hartree

| Symbol | X          | Y          | Z         |
|--------|------------|------------|-----------|
| O      | -3.0149130 | -0.6909280 | 0.8976610 |
| H      | -0.0151480 | -5.8445170 | 0.9749300 |

|   |            |            |            |
|---|------------|------------|------------|
| C | -2.5864440 | -1.3353160 | -0.2588520 |
| C | -1.2985260 | -1.9477970 | -0.1233860 |
| C | -0.2674020 | -1.6756190 | 0.9364300  |
| C | 1.0260040  | -2.2481030 | 0.2963170  |
| C | 0.4793740  | -3.2008260 | -0.7844530 |
| C | 0.5990940  | -4.6764370 | -0.4840510 |
| O | -0.6884450 | -0.0286930 | -1.3637430 |
| O | -0.6290330 | -2.4002470 | 2.0865820  |
| O | 1.8935040  | -1.3678830 | -0.3731420 |
| O | -0.9349430 | -2.8922960 | -0.9228590 |
| O | 0.0488100  | -4.9029570 | 0.7995210  |
| H | -2.0921040 | -0.5839040 | -1.0508550 |
| H | -3.3338220 | -1.9707270 | -0.7434370 |
| H | -3.2477940 | 0.2186670  | 0.6728670  |
| H | -0.2143000 | -0.6230390 | 1.1829240  |
| H | -0.5668860 | -3.3479640 | 1.9018100  |
| H | 1.5723510  | -2.7918270 | 1.0792190  |
| H | 0.9421810  | -2.9605650 | -1.7435680 |
| H | 0.0593710  | -5.2451050 | -1.2497280 |
| H | 1.6613290  | -4.9505240 | -0.5157340 |
| H | -0.2004800 | 0.0661720  | -2.1872250 |
| H | -0.3031240 | 1.5182050  | -0.6777900 |
| C | 2.4534900  | -0.3136960 | 0.3569910  |
| C | 3.5214020  | 0.2891830  | -0.5476960 |
| C | 3.9813220  | 1.6169120  | 0.0162500  |
| C | 2.7884040  | 2.5510310  | 0.1144750  |

|   |            |            |            |
|---|------------|------------|------------|
| C | 1.7113830  | 1.9304220  | 0.9981590  |
| C | 0.3569010  | 2.6200670  | 0.8358410  |
| O | 4.6482020  | -0.5539120 | -0.6521790 |
| O | 4.9405690  | 2.2281220  | -0.8168720 |
| O | 3.1538410  | 3.7766790  | 0.7043780  |
| O | 1.4365560  | 0.5896900  | 0.6347700  |
| O | -0.1435280 | 2.4786530  | -0.4586650 |
| H | 2.9129890  | -0.6956620 | 1.2891620  |
| H | 3.0608440  | 0.4595880  | -1.5314900 |
| H | 4.3861060  | -1.3527820 | -1.1185680 |
| H | 4.3990450  | 1.4605980  | 1.0252080  |
| H | 5.6437740  | 1.5899880  | -0.9774610 |
| H | 2.3738200  | 2.7054880  | -0.8922700 |
| H | 2.0493980  | 1.9906090  | 2.0450500  |
| H | -0.3271050 | 2.1910880  | 1.5872600  |
| H | 0.4771690  | 3.6872620  | 1.0494480  |
| H | 3.8862660  | 4.1362230  | 0.1930460  |
| C | -4.4687640 | 2.4764670  | 0.9522010  |
| C | -3.3263810 | 2.6091740  | 0.1642610  |
| C | -3.2720650 | 2.0099750  | -1.0929030 |
| C | -4.3638400 | 1.2808250  | -1.5595810 |
| C | -5.5041270 | 1.1456880  | -0.7716870 |
| C | -5.5566810 | 1.7427020  | 0.4852690  |
| H | -4.5078250 | 2.9378430  | 1.9330310  |
| H | -2.4646510 | 3.1651300  | 0.5160630  |
| H | -2.3662630 | 2.0920540  | -1.6812180 |

|   |            |           |            |
|---|------------|-----------|------------|
| H | -4.3177960 | 0.8078360 | -2.5350500 |
| H | -6.3500390 | 0.5710410 | -1.1333630 |
| H | -6.4411460 | 1.6310750 | 1.1026190  |

$8Bz - E = -1529.791942$  Hartree

| Symbol | X          | Y          | Z          |
|--------|------------|------------|------------|
| O      | -3.0149130 | -0.6909280 | 0.8976610  |
| H      | -0.0151480 | -5.8445170 | 0.9749300  |
| C      | -2.5864440 | -1.3353160 | -0.2588520 |
| C      | -1.2985260 | -1.9477970 | -0.1233860 |
| C      | -0.2674020 | -1.6756190 | 0.9364300  |
| C      | 1.0260040  | -2.2481030 | 0.2963170  |
| C      | 0.4793740  | -3.2008260 | -0.7844530 |
| C      | 0.5990940  | -4.6764370 | -0.4840510 |
| O      | -0.6884450 | -0.0286930 | -1.3637430 |
| O      | -0.6290330 | -2.4002470 | 2.0865820  |
| O      | 1.8935040  | -1.3678830 | -0.3731420 |
| O      | -0.9349430 | -2.8922960 | -0.9228590 |
| O      | 0.0488100  | -4.9029570 | 0.7995210  |
| H      | -2.0921040 | -0.5839040 | -1.0508550 |
| H      | -3.3338220 | -1.9707270 | -0.7434370 |
| H      | -3.2477940 | 0.2186670  | 0.6728670  |
| H      | -0.2143000 | -0.6230390 | 1.1829240  |
| H      | -0.5668860 | -3.3479640 | 1.9018100  |
| H      | 1.5723510  | -2.7918270 | 1.0792190  |
| H      | 0.9421810  | -2.9605650 | -1.7435680 |

|   |            |            |            |
|---|------------|------------|------------|
| H | 0.0593710  | -5.2451050 | -1.2497280 |
| H | 1.6613290  | -4.9505240 | -0.5157340 |
| H | -0.2004800 | 0.0661720  | -2.1872250 |
| H | -0.3031240 | 1.5182050  | -0.6777900 |
| C | 2.4534900  | -0.3136960 | 0.3569910  |
| C | 3.5214020  | 0.2891830  | -0.5476960 |
| C | 3.9813220  | 1.6169120  | 0.0162500  |
| C | 2.7884040  | 2.5510310  | 0.1144750  |
| C | 1.7113830  | 1.9304220  | 0.9981590  |
| C | 0.3569010  | 2.6200670  | 0.8358410  |
| O | 4.6482020  | -0.5539120 | -0.6521790 |
| O | 4.9405690  | 2.2281220  | -0.8168720 |
| O | 3.1538410  | 3.7766790  | 0.7043780  |
| O | 1.4365560  | 0.5896900  | 0.6347700  |
| O | -0.1435280 | 2.4786530  | -0.4586650 |
| H | 2.9129890  | -0.6956620 | 1.2891620  |
| H | 3.0608440  | 0.4595880  | -1.5314900 |
| H | 4.3861060  | -1.3527820 | -1.1185680 |
| H | 4.3990450  | 1.4605980  | 1.0252080  |
| H | 5.6437740  | 1.5899880  | -0.9774610 |
| H | 2.3738200  | 2.7054880  | -0.8922700 |
| H | 2.0493980  | 1.9906090  | 2.0450500  |
| H | -0.3271050 | 2.1910880  | 1.5872600  |
| H | 0.4771690  | 3.6872620  | 1.0494480  |
| H | 3.8862660  | 4.1362230  | 0.1930460  |
| C | -4.4687640 | 2.4764670  | 0.9522010  |



|   |            |           |            |
|---|------------|-----------|------------|
| C | -3.3263810 | 2.6091740 | 0.1642610  |
| C | -3.2720650 | 2.0099750 | -1.0929030 |
| C | -4.3638400 | 1.2808250 | -1.5595810 |
| C | -5.5041270 | 1.1456880 | -0.7716870 |
| C | -5.5566810 | 1.7427020 | 0.4852690  |
| H | -4.5078250 | 2.9378430 | 1.9330310  |
| H | -2.4646510 | 3.1651300 | 0.5160630  |
| H | -2.3662630 | 2.0920540 | -1.6812180 |
| H | -4.3177960 | 0.8078360 | -2.5350500 |
| H | -6.3500390 | 0.5710410 | -1.1333630 |
| H | -6.4411460 | 1.6310750 | 1.1026190  |

**TS8c3** –  $E = -1529.674981$  Hartree

| Symbol | X          | Y          | Z          |
|--------|------------|------------|------------|
| O      | -3.0149130 | -0.6909280 | 0.8976610  |
| H      | -0.0151480 | -5.8445170 | 0.9749300  |
| C      | -2.5864440 | -1.3353160 | -0.2588520 |
| C      | -1.2985260 | -1.9477970 | -0.1233860 |
| C      | -0.2674020 | -1.6756190 | 0.9364300  |
| C      | 1.0260040  | -2.2481030 | 0.2963170  |
| C      | 0.4793740  | -3.2008260 | -0.7844530 |
| C      | 0.5990940  | -4.6764370 | -0.4840510 |
| O      | -0.6884450 | -0.0286930 | -1.3637430 |
| O      | -0.6290330 | -2.4002470 | 2.0865820  |
| O      | 1.8935040  | -1.3678830 | -0.3731420 |
| O      | -0.9349430 | -2.8922960 | -0.9228590 |

|   |            |            |            |
|---|------------|------------|------------|
| O | 0.0488100  | -4.9029570 | 0.7995210  |
| H | -2.0921040 | -0.5839040 | -1.0508550 |
| H | -3.3338220 | -1.9707270 | -0.7434370 |
| H | -3.2477940 | 0.2186670  | 0.6728670  |
| H | -0.2143000 | -0.6230390 | 1.1829240  |
| H | -0.5668860 | -3.3479640 | 1.9018100  |
| H | 1.5723510  | -2.7918270 | 1.0792190  |
| H | 0.9421810  | -2.9605650 | -1.7435680 |
| H | 0.0593710  | -5.2451050 | -1.2497280 |
| H | 1.6613290  | -4.9505240 | -0.5157340 |
| H | -0.2004800 | 0.0661720  | -2.1872250 |
| H | -0.3031240 | 1.5182050  | -0.6777900 |
| C | 2.4534900  | -0.3136960 | 0.3569910  |
| C | 3.5214020  | 0.2891830  | -0.5476960 |
| C | 3.9813220  | 1.6169120  | 0.0162500  |
| C | 2.7884040  | 2.5510310  | 0.1144750  |
| C | 1.7113830  | 1.9304220  | 0.9981590  |
| C | 0.3569010  | 2.6200670  | 0.8358410  |
| O | 4.6482020  | -0.5539120 | -0.6521790 |
| O | 4.9405690  | 2.2281220  | -0.8168720 |
| O | 3.1538410  | 3.7766790  | 0.7043780  |
| O | 1.4365560  | 0.5896900  | 0.6347700  |
| O | -0.1435280 | 2.4786530  | -0.4586650 |
| H | 2.9129890  | -0.6956620 | 1.2891620  |
| H | 3.0608440  | 0.4595880  | -1.5314900 |
| H | 4.3861060  | -1.3527820 | -1.1185680 |

|   |            |           |            |
|---|------------|-----------|------------|
| H | 4.3990450  | 1.4605980 | 1.0252080  |
| H | 5.6437740  | 1.5899880 | -0.9774610 |
| H | 2.3738200  | 2.7054880 | -0.8922700 |
| H | 2.0493980  | 1.9906090 | 2.0450500  |
| H | -0.3271050 | 2.1910880 | 1.5872600  |
| H | 0.4771690  | 3.6872620 | 1.0494480  |
| H | 3.8862660  | 4.1362230 | 0.1930460  |
| C | -4.4687640 | 2.4764670 | 0.9522010  |
| C | -3.3263810 | 2.6091740 | 0.1642610  |
| C | -3.2720650 | 2.0099750 | -1.0929030 |
| C | -4.3638400 | 1.2808250 | -1.5595810 |
| C | -5.5041270 | 1.1456880 | -0.7716870 |
| C | -5.5566810 | 1.7427020 | 0.4852690  |
| H | -4.5078250 | 2.9378430 | 1.9330310  |
| H | -2.4646510 | 3.1651300 | 0.5160630  |
| H | -2.3662630 | 2.0920540 | -1.6812180 |
| H | -4.3177960 | 0.8078360 | -2.5350500 |
| H | -6.3500390 | 0.5710410 | -1.1333630 |
| H | -6.4411460 | 1.6310750 | 1.1026190  |

$\mathbf{9}_{Bz} - E = -1453.353571$  Hartree

| Symbol | X         | Y          | Z          |
|--------|-----------|------------|------------|
| O      | 2.6103690 | -0.1483030 | 3.4573620  |
| H      | 3.6181220 | -0.6066310 | -1.2154920 |
| C      | 1.8378170 | 0.5242800  | 2.5594600  |
| C      | 1.5127760 | 0.0390130  | 1.3667980  |

|   |            |            |            |
|---|------------|------------|------------|
| C | 0.6517790  | 0.6320720  | 0.2879210  |
| C | 0.1280910  | -0.6531160 | -0.3942530 |
| C | 1.2227040  | -1.6976160 | -0.1191560 |
| C | 2.1825810  | -1.9289860 | -1.2745470 |
| O | 1.3262010  | 1.4748470  | -0.6141180 |
| O | -1.0702120 | -1.1199180 | 0.2045070  |
| O | 1.9598420  | -1.2178080 | 1.0069170  |
| O | 2.7932670  | -0.7303520 | -1.7030600 |
| H | 1.5258390  | 1.5048120  | 2.8907210  |
| H | 2.7434950  | -1.0429060 | 3.1197440  |
| H | -0.1785050 | 1.2055880  | 0.6958370  |
| H | 1.9808050  | 0.9451840  | -1.0946480 |
| H | -0.0266620 | -0.4788410 | -1.4660160 |
| H | 0.7491070  | -2.6474080 | 0.1540450  |
| H | 2.9394850  | -2.6602190 | -0.9674190 |
| H | 1.6294710  | -2.3456930 | -2.1232800 |
| H | -2.7391840 | 2.5213760  | 1.3258440  |
| C | -2.2403050 | -0.6688390 | -0.3815330 |
| C | -3.3971660 | -1.4412930 | 0.2378150  |
| C | -4.6947220 | -0.9347180 | -0.3634480 |
| C | -4.8097190 | 0.5694940  | -0.1798680 |
| C | -3.5639270 | 1.2607460  | -0.7329110 |
| C | -3.5351040 | 2.7475800  | -0.4192800 |
| O | -3.3137220 | -2.8198440 | -0.0385060 |
| O | -5.8226490 | -1.5255630 | 0.2402820  |
| O | -5.9209730 | 1.0768040  | -0.8785890 |

|   |            |            |            |
|---|------------|------------|------------|
| O | -2.3963020 | 0.7067540  | -0.1383560 |
| O | -3.5037850 | 2.9846290  | 0.9684990  |
| H | -2.2086020 | -0.8436040 | -1.4745340 |
| H | -3.3915900 | -1.2491030 | 1.3205780  |
| H | -2.5071010 | -3.1585770 | 0.3623690  |
| H | -4.6854770 | -1.1540160 | -1.4443400 |
| H | -5.7289940 | -2.4819850 | 0.1771890  |
| H | -4.8850500 | 0.7922210  | 0.8944340  |
| H | -3.5363870 | 1.1199880  | -1.8257460 |
| H | -2.6648050 | 3.1947940  | -0.9178700 |
| H | -4.4445970 | 3.2107500  | -0.8072150 |
| H | -6.6949450 | 0.5779560  | -0.5961800 |
| C | 4.9564460  | 1.7196720  | -1.1656500 |
| C | 4.5043110  | 1.5001510  | 0.1332920  |
| C | 4.8692640  | 0.3393240  | 0.8110870  |
| C | 5.6852740  | -0.6027230 | 0.1871270  |
| C | 6.1381160  | -0.3825690 | -1.1131090 |
| C | 5.7737240  | 0.7797740  | -1.7887710 |
| H | 4.6616430  | 2.6188950  | -1.6952110 |
| H | 3.8478470  | 2.2193600  | 0.6093940  |
| H | 4.5094490  | 0.1715150  | 1.8204920  |
| H | 5.9691510  | -1.5074740 | 0.7139510  |
| H | 6.7709510  | -1.1169070 | -1.5991410 |
| H | 6.1185960  | 0.9474710  | -2.8028570 |

**TS9<sub>Bz</sub>** –  $E = -1453.28941$  Hartree

| Symbol | X          | Y          | Z          |
|--------|------------|------------|------------|
| O      | 2.1871460  | 2.3968180  | 1.6982810  |
| H      | 3.5497560  | -0.8338630 | -1.2873550 |
| C      | 2.3192900  | 1.2165190  | 2.1540000  |
| C      | 1.5311640  | 0.2003460  | 1.6488590  |
| C      | 0.5335860  | 0.5261050  | 0.7059470  |
| C      | 0.0940150  | -0.7856850 | 0.0819060  |
| C      | 1.1886310  | -1.7627350 | 0.5648550  |
| C      | 2.2023470  | -2.0493910 | -0.5324110 |
| O      | 1.3221840  | 1.5519930  | -0.5192660 |
| O      | -1.1649030 | -1.1887900 | 0.5905330  |
| O      | 1.8170410  | -1.1674710 | 1.6906600  |
| O      | 2.5922580  | -0.8460170 | -1.1753310 |
| H      | 3.0958680  | 1.0072870  | 2.9026340  |
| H      | 1.7428700  | 2.1034940  | 0.2672390  |
| H      | -0.2206630 | 1.2791890  | 0.8973440  |
| H      | 2.0068240  | 0.9481990  | -0.8655740 |
| H      | 0.0524520  | -0.7207740 | -1.0126140 |
| H      | 0.7325490  | -2.7053120 | 0.8834030  |
| H      | 3.0700690  | -2.5435230 | -0.0828450 |
| H      | 1.7505810  | -2.7272790 | -1.2700140 |
| H      | -2.8315630 | 2.6439110  | 1.0796320  |
| C      | -2.2561520 | -0.7948720 | -0.1674800 |
| C      | -3.4939890 | -1.4608480 | 0.4168100  |
| C      | -4.7048780 | -1.0063040 | -0.3768130 |
| C      | -4.7869270 | 0.5113460  | -0.3928970 |

|   |            |            |            |
|---|------------|------------|------------|
| C | -3.4684760 | 1.1029240  | -0.8902030 |
| C | -3.4250920 | 2.6166770  | -0.7617300 |
| O | -3.4288460 | -2.8643040 | 0.3205790  |
| O | -5.9080060 | -1.4926910 | 0.1716300  |
| O | -5.8013750 | 0.9492370  | -1.2643930 |
| O | -2.3869900 | 0.6027870  | -0.1121480 |
| O | -3.5549860 | 3.0317310  | 0.5768280  |
| H | -2.1172350 | -1.1071440 | -1.2209900 |
| H | -3.5931440 | -1.1345500 | 1.4621190  |
| H | -2.6920210 | -3.1711040 | 0.8582100  |
| H | -4.5918620 | -1.3599430 | -1.4154330 |
| H | -5.8403620 | -2.4510680 | 0.2385730  |
| H | -4.9657400 | 0.8693620  | 0.6312750  |
| H | -3.3327340 | 0.8256450  | -1.9484540 |
| H | -2.4867130 | 2.9798360  | -1.2020070 |
| H | -4.2647850 | 3.0424170  | -1.3148360 |
| H | -6.6185080 | 0.5108190  | -1.0042010 |
| C | 5.1805240  | -0.0602690 | 0.7140520  |
| C | 4.9066740  | 1.1664640  | 0.1131710  |
| C | 5.1465670  | 1.3400610  | -1.2479720 |
| C | 5.6613580  | 0.2915610  | -2.0079280 |
| C | 5.9428750  | -0.9330310 | -1.4039320 |
| C | 5.7032230  | -1.1071860 | -0.0410290 |
| H | 4.9798150  | -0.2061190 | 1.7695190  |
| H | 4.4923660  | 1.9801290  | 0.6997580  |
| H | 4.9296400  | 2.2933690  | -1.7174360 |

|   |           |            |            |
|---|-----------|------------|------------|
| H | 5.8439750 | 0.4273530  | -3.0680740 |
| H | 6.3491750 | -1.7479140 | -1.9930780 |
| H | 5.9227840 | -2.0588580 | 0.4309850  |

**10Bz** –  $E = -1376.933682$  Hartree

| Symbol | X          | Y          | Z          |
|--------|------------|------------|------------|
| O      | -3.2593800 | 3.1820070  | 0.6946080  |
| H      | -5.1091310 | -1.2348180 | 1.2221850  |
| C      | -3.8289480 | 2.2895240  | 0.1252120  |
| C      | -3.2870120 | 0.9128760  | 0.0448620  |
| C      | -2.1624020 | 0.4234390  | 0.5638970  |
| C      | -2.0542010 | -1.0228430 | 0.1673070  |
| C      | -3.3283360 | -1.2257110 | -0.6816000 |
| C      | -4.2535700 | -2.3018540 | -0.1480180 |
| O      | -0.9222640 | -1.3055570 | -0.6463730 |
| O      | -4.0430080 | 0.0248950  | -0.6625880 |
| O      | -4.6066040 | -2.0551680 | 1.1917240  |
| H      | -4.7987660 | 2.4433300  | -0.3844710 |
| H      | -1.4433280 | 0.9620260  | 1.1607060  |
| H      | -2.0414630 | -1.6912850 | 1.0393590  |
| H      | -3.0408920 | -1.4366270 | -1.7171320 |
| H      | -5.1402380 | -2.3758930 | -0.7906160 |
| H      | -3.7321400 | -3.2638510 | -0.1703670 |
| H      | 1.6349810  | 1.7109720  | 1.0679550  |
| C      | 0.2251650  | -1.6504040 | 0.0532040  |
| C      | 1.2978300  | -1.9894560 | -0.9719750 |



|   |           |            |            |
|---|-----------|------------|------------|
| C | 2.5941450 | -2.2955240 | -0.2469570 |
| C | 2.9683140 | -1.1468260 | 0.6747650  |
| C | 1.8029030 | -0.8267800 | 1.6093310  |
| C | 2.0612250 | 0.4094410  | 2.4544770  |
| O | 0.9583870 | -3.1263060 | -1.7317510 |
| O | 3.6634680 | -2.4877780 | -1.1457120 |
| O | 4.0740840 | -1.4879940 | 1.4753000  |
| O | 0.6308160 | -0.5655850 | 0.8457840  |
| O | 2.3642350 | 1.5386170  | 1.6782610  |
| H | 0.0253990 | -2.5256210 | 0.7025940  |
| H | 1.4372910 | -1.1065130 | -1.6125740 |
| H | 0.1557340 | -2.9324360 | -2.2255840 |
| H | 2.4463440 | -3.2007530 | 0.3653050  |
| H | 3.4173840 | -3.1892880 | -1.7578170 |
| H | 3.1786890 | -0.2534790 | 0.0678660  |
| H | 1.6329830 | -1.6888970 | 2.2760900  |
| H | 1.1818620 | 0.5808600  | 3.0920810  |
| H | 2.9256170 | 0.2190970  | 3.0947130  |
| H | 4.7836310 | -1.7675990 | 0.8873220  |
| C | 0.9695980 | 3.9597140  | -0.2187620 |
| C | 2.2904310 | 3.9219460  | -0.6550990 |
| C | 2.7337780 | 2.8598650  | -1.4368870 |
| C | 1.8581660 | 1.8332000  | -1.7774630 |
| C | 0.5388600 | 1.8627200  | -1.3318730 |
| C | 0.0923500 | 2.9307340  | -0.5551370 |
| H | 0.6217090 | 4.7850190  | 0.3924390  |

|   |            |           |            |
|---|------------|-----------|------------|
| H | 2.9760670  | 4.7147260 | -0.3783300 |
| H | 3.7642140  | 2.8263850 | -1.7726750 |
| H | 2.2108730  | 1.0076730 | -2.3876720 |
| H | -0.1394940 | 1.0503470 | -1.5743330 |
| H | -0.9349680 | 2.9652090 | -0.2067610 |

**TS10<sub>Bz</sub>** –  $E = -1376.851139$  Hartree

| Symbol | X          | Y          | Z          |
|--------|------------|------------|------------|
| O      | -5.5921600 | 0.3204000  | 1.8747820  |
| H      | -0.7127600 | -1.9200390 | -1.7501620 |
| C      | -5.2873290 | 0.4591270  | 0.7248930  |
| C      | -3.8602490 | 0.3713490  | 0.2902710  |
| C      | -2.7235290 | 0.1837350  | 1.0631920  |
| C      | -1.6734980 | 0.2071650  | 0.1647030  |
| C      | -2.1995360 | 0.4541030  | -1.1703560 |
| C      | -1.7874350 | -0.4404570 | -2.3363850 |
| O      | -0.8701580 | 2.5553970  | -0.2956000 |
| O      | -3.6254780 | 0.4881020  | -0.9835830 |
| O      | -1.6504890 | -1.7848510 | -1.9605580 |
| H      | -6.0181620 | 0.6513370  | -0.0793650 |
| H      | -2.7111950 | 0.0678230  | 2.1346720  |
| H      | -0.6213280 | 0.0429820  | 0.3407230  |
| H      | -1.8230410 | 1.5419710  | -1.2839890 |
| H      | -2.5660190 | -0.3621920 | -3.1010710 |
| H      | -0.8544190 | -0.0347310 | -2.7318570 |
| H      | 1.6869200  | -1.8512750 | -0.8962090 |

|   |           |            |            |
|---|-----------|------------|------------|
| C | 0.4192090 | 2.3959980  | -0.5457430 |
| C | 1.2228510 | 2.3226660  | 0.7665680  |
| C | 2.6793440 | 2.0075140  | 0.5159340  |
| C | 2.7716050 | 0.6965490  | -0.2411220 |
| C | 1.9650950 | 0.8016630  | -1.5357620 |
| C | 1.9508160 | -0.5058630 | -2.3160470 |
| O | 1.1333680 | 3.5408570  | 1.4628490  |
| O | 3.4141160 | 1.8532550  | 1.7172920  |
| O | 4.1044390 | 0.3656010  | -0.5579700 |
| O | 0.6321790 | 1.1338690  | -1.2525560 |
| O | 1.2050830 | -1.5213820 | -1.6640110 |
| H | 0.8670550 | 3.1895380  | -1.1887710 |
| H | 0.7837980 | 1.5053580  | 1.3671720  |
| H | 0.2122370 | 3.8220030  | 1.3780070  |
| H | 3.1253400 | 2.8080270  | -0.0960340 |
| H | 3.2529680 | 2.6339370  | 2.2582470  |
| H | 2.3216950 | -0.0857600 | 0.3922660  |
| H | 2.4423660 | 1.5697970  | -2.1700620 |
| H | 1.4576690 | -0.3416350 | -3.2780850 |
| H | 2.9801430 | -0.8304610 | -2.5024970 |
| H | 4.6386540 | 0.5593600  | 0.2206220  |
| C | 0.2482960 | -3.7705520 | 0.4087830  |
| C | 1.6344640 | -3.8826840 | 0.4949190  |
| C | 2.3550540 | -3.0190350 | 1.3176940  |
| C | 1.6873020 | -2.0515410 | 2.0668400  |
| C | 0.3017040 | -1.9484710 | 1.9874580  |

|   |            |            |            |
|---|------------|------------|------------|
| C | -0.4178820 | -2.8026190 | 1.1543330  |
| H | -0.3117570 | -4.4297610 | -0.2451780 |
| H | 2.1540200  | -4.6351950 | -0.0879910 |
| H | 3.4350180  | -3.0987950 | 1.3762230  |
| H | 2.2469740  | -1.3738170 | 2.7028600  |
| H | -0.2144100 | -1.1966010 | 2.5769890  |
| H | -1.4966420 | -2.7137330 | 1.0772790  |

### In the Presence of Dimethyl Ether (DME)

The Cartesian coordinates for all the stable structures in the presence of DME reported in this work are listed below including computed absolute energies.

$1_{\text{DME}} - E = -1452.602723$  Hartree

| Symbol | X         | Y          | Z          |
|--------|-----------|------------|------------|
| C      | 4.3343520 | -0.0962920 | 0.1118240  |
| C      | 3.4393430 | 1.0597430  | -0.3219350 |
| C      | 2.0473670 | 0.8948980  | 0.2646940  |
| C      | 1.5313640 | -0.5141600 | -0.0026210 |
| C      | 2.5432910 | -1.5879170 | 0.3952450  |
| C      | 2.0903460 | -2.9753890 | -0.0276640 |
| O      | 5.5467150 | 0.0611840  | -0.5432140 |
| O      | 3.9731790 | 2.2800330  | 0.1248720  |
| O      | 1.2115960 | 1.8690820  | -0.3005610 |
| O      | 0.3517400 | -0.7237570 | 0.7587040  |
| O      | 3.7797810 | -1.3385780 | -0.2523480 |
| O      | 1.8975170 | -3.0527500 | -1.4234400 |
| H      | 4.4668180 | -0.0697930 | 1.2088010  |

|   |            |            |            |
|---|------------|------------|------------|
| H | 3.3647770  | 1.0304860  | -1.4197370 |
| H | 2.1196860  | 1.0297180  | 1.3586980  |
| H | 1.3150200  | -0.6094080 | -1.0744970 |
| H | 2.6712230  | -1.5678890 | 1.4902060  |
| H | 6.1667180  | -0.6026320 | -0.2272260 |
| H | 4.8549770  | 2.3682030  | -0.2513360 |
| H | 0.2842600  | 1.6058500  | -0.1962050 |
| H | -2.7592780 | 2.6106640  | -0.2782470 |
| H | 2.7246730  | -2.7975190 | -1.8460860 |
| H | 2.8361430  | -3.7072740 | 0.3091730  |
| H | 1.1329240  | -3.2061160 | 0.4474980  |
| C | -0.7837290 | -1.0137990 | 0.0304900  |
| C | -1.8010270 | -1.6789860 | 0.9465830  |
| C | -3.1333490 | -1.8080310 | 0.2234520  |
| C | -3.5656900 | -0.4560750 | -0.3096870 |
| C | -2.4703690 | 0.0813030  | -1.2317830 |
| C | -2.8238380 | 1.4384520  | -1.8245500 |
| O | -1.2971380 | -2.9373680 | 1.3166840  |
| O | -4.0541420 | -2.3416000 | 1.1479020  |
| O | -4.7967390 | -0.6291160 | -0.9779740 |
| O | -1.2838590 | 0.2141250  | -0.4636280 |
| O | -3.4389060 | 2.2973690  | -0.8988660 |
| H | -0.5495040 | -1.6849160 | -0.8161400 |
| H | -1.9368560 | -1.0335980 | 1.8282280  |
| H | -2.0150020 | -3.4218230 | 1.7394010  |
| H | -3.0076150 | -2.4999500 | -0.6262060 |

|   |            |            |            |
|---|------------|------------|------------|
| H | -4.9230610 | -2.3300900 | 0.7316370  |
| H | -3.6780980 | 0.2399580  | 0.5315090  |
| H | -2.3001620 | -0.6315850 | -2.0559870 |
| H | -1.9093900 | 1.8776640  | -2.2463020 |
| H | -3.5328390 | 1.2854880  | -2.6440280 |
| O | -1.2628770 | 3.0679510  | 0.6651520  |
| C | -0.9743620 | 2.4932730  | 1.9194590  |
| C | -0.6114050 | 4.3076530  | 0.4753230  |
| H | 0.1096480  | 2.3712280  | 2.0455730  |
| H | -1.4506420 | 1.5113200  | 1.9470130  |
| H | -1.3633090 | 3.1199220  | 2.7330630  |
| H | 0.4756290  | 4.1701930  | 0.5039740  |
| H | -0.9204520 | 5.0271550  | 1.2452190  |
| H | -0.9046780 | 4.6816190  | -0.5069740 |
| H | -5.2203040 | 0.2324890  | -1.0502720 |

**TS1<sub>DME</sub>** –  $E = -1452.516841$  Hartree

| Symbol | X         | Y          | Z          |
|--------|-----------|------------|------------|
| C      | 4.1963700 | -0.7278490 | -0.1579520 |
| C      | 3.4308940 | 0.3104070  | -0.9737740 |
| C      | 2.2420860 | 0.8271590  | -0.1790980 |
| C      | 1.4258480 | -0.3563730 | 0.3468510  |
| C      | 2.3194560 | -1.3171720 | 1.1264420  |
| C      | 1.5791600 | -2.5473580 | 1.6145400  |
| O      | 5.1779860 | -1.2580370 | -0.9841160 |
| O      | 4.2798450 | 1.3841930  | -1.2889570 |

|   |            |            |            |
|---|------------|------------|------------|
| O | 1.4495280  | 1.6360300  | -1.0045990 |
| O | 0.3810260  | 0.0496640  | 1.1821550  |
| O | 3.3640010  | -1.7770570 | 0.2815660  |
| O | 0.9710300  | -3.2501200 | 0.5465170  |
| H | 4.6433300  | -0.2347900 | 0.7244290  |
| H | 3.0574610  | -0.1856010 | -1.8835180 |
| H | 2.6208030  | 1.4062190  | 0.6797580  |
| H | 1.0428680  | -0.8946390 | -0.5393240 |
| H | 2.7381820  | -0.7895260 | 2.0001750  |
| H | 5.7484420  | -1.8343100 | -0.4672510 |
| H | 5.0213750  | 1.0325570  | -1.7918700 |
| H | 0.9918250  | 2.2757080  | -0.4319840 |
| H | -0.2678900 | 0.6276210  | 0.6650140  |
| H | 1.6505340  | -3.4055480 | -0.1193910 |
| H | 2.2774500  | -3.1970360 | 2.1570790  |
| H | 0.7814450  | -2.2400420 | 2.2948000  |
| C | -1.6305460 | -1.3870020 | 0.0684450  |
| C | -2.8440370 | -1.1463400 | 0.9292660  |
| C | -3.9275110 | -0.2316630 | 0.3158190  |
| C | -3.8373430 | -0.3523930 | -1.2142640 |
| C | -2.4216840 | -0.1366940 | -1.7394480 |
| C | -1.7381990 | 1.2054600  | -1.3605420 |
| O | -3.2921680 | -2.4708700 | 1.1595420  |
| O | -3.8689020 | 1.0743870  | 0.7636170  |
| O | -4.2630620 | -1.6810650 | -1.4998880 |
| O | -1.5459540 | -1.1473560 | -1.1620760 |

|   |            |            |            |
|---|------------|------------|------------|
| O | -1.5157040 | 1.2568850  | -0.0164080 |
| H | -0.8401660 | -2.0407700 | 0.4409510  |
| H | -2.5105060 | -0.7288780 | 1.8820040  |
| H | -3.7859700 | -2.7514770 | 0.3768590  |
| H | -4.8913470 | -0.6595770 | 0.6124030  |
| H | -2.9115040 | 1.3566760  | 0.5817720  |
| H | -4.4966240 | 0.3960380  | -1.6686090 |
| H | -2.3678510 | -0.3261190 | -2.8147810 |
| H | -0.8071800 | 1.2719180  | -1.9449520 |
| H | -2.4228500 | 1.9966950  | -1.7224450 |
| O | 0.4085530  | 3.5135970  | 0.7987870  |
| C | -0.5495190 | 4.3129510  | 0.1451580  |
| C | -0.0190070 | 3.1286320  | 2.0863250  |
| H | -1.5059150 | 3.7796030  | 0.0718400  |
| H | -0.1697620 | 4.5283110  | -0.8561770 |
| H | -0.6966530 | 5.2586610  | 0.6850040  |
| H | -0.9683010 | 2.5816010  | 2.0280730  |
| H | -0.1429700 | 4.0134410  | 2.7262050  |
| H | 0.7448310  | 2.4730430  | 2.5059920  |
| H | -4.2583090 | -1.8423750 | -2.4477550 |

**2DME** –  $E = -1376.179048$  Hartree

| Symbol | X          | Y          | Z         |
|--------|------------|------------|-----------|
| C      | -3.4345760 | 0.5523010  | 0.1632790 |
| C      | -2.4174060 | 0.5305380  | 1.3052630 |
| C      | -1.7601880 | -0.8660290 | 1.3694930 |



|   |            |            |            |
|---|------------|------------|------------|
| C | -1.5265750 | -1.5157280 | -0.0247370 |
| C | -2.6486330 | -1.1576680 | -0.9979770 |
| C | -4.0390300 | -1.5608700 | -0.5106620 |
| O | -1.5105270 | 1.5827810  | 1.1785820  |
| O | -2.5432780 | -1.7592970 | 2.1405780  |
| O | -2.7839710 | 0.2586450  | -1.0467210 |
| O | -4.3904240 | -0.4872800 | 0.3612710  |
| H | -3.9339730 | 1.5195300  | 0.0707960  |
| H | -2.9461810 | 0.6822710  | 2.2528660  |
| H | -0.9281230 | 1.4438390  | 0.4133100  |
| H | -0.8040730 | -0.7510540 | 1.8868230  |
| H | -3.4699220 | -1.5139110 | 2.0408050  |
| H | -1.5003160 | -2.6018580 | 0.1426140  |
| H | -2.4085310 | -1.5141980 | -2.0006990 |
| H | -4.7479520 | -1.6048630 | -1.3423680 |
| H | -4.0532190 | -2.5038840 | 0.0410210  |
| O | -0.3420380 | -1.1170080 | -0.7024570 |
| C | 0.8406620  | -1.0967420 | 0.0206660  |
| C | 1.9844430  | -1.5030700 | -0.8996300 |
| O | 1.0248900  | 0.2162370  | 0.4727500  |
| H | 0.7976000  | -1.8016590 | 0.8721260  |
| C | 3.2919920  | -1.3540950 | -0.1454920 |
| O | 1.8718970  | -2.8501950 | -1.2984110 |
| H | 1.9856880  | -0.8328610 | -1.7709390 |
| C | 2.2103790  | 0.4357830  | 1.2247210  |
| C | 3.4335250  | 0.0622250  | 0.3888370  |

|   |            |            |            |
|---|------------|------------|------------|
| O | 4.4069100  | -1.6139190 | -0.9684950 |
| H | 3.2823640  | -2.0503230 | 0.7098830  |
| H | 1.0778090  | -2.9412370 | -1.8338690 |
| C | 2.1967570  | 1.9078380  | 1.6134330  |
| H | 2.2015930  | -0.1837480 | 2.1374790  |
| O | 4.5653470  | 0.1716860  | 1.2177390  |
| H | 3.4972600  | 0.7599280  | -0.4594100 |
| H | 4.3028540  | -2.4946380 | -1.3436340 |
| O | 2.2008420  | 2.7477760  | 0.4883590  |
| H | 1.3169380  | 2.0873750  | 2.2457410  |
| H | 3.0993890  | 2.1230890  | 2.1905750  |
| H | 1.3415560  | 2.6892190  | 0.0451520  |
| H | 5.3250680  | -0.1415200 | 0.7156040  |
| O | -0.1992640 | 2.4919230  | -1.1267850 |
| C | 0.1869450  | 1.7617100  | -2.2694810 |
| C | -1.3088690 | 3.3295070  | -1.3711610 |
| H | -0.5976010 | 1.0478640  | -2.5510650 |
| H | 1.0975010  | 1.2203890  | -2.0089920 |
| H | 0.3921670  | 2.4398690  | -3.1084040 |
| H | -2.1637840 | 2.7354730  | -1.7208460 |
| H | -1.0594280 | 4.0866390  | -2.1261200 |
| H | -1.5643290 | 3.8152830  | -0.4290520 |

**TS<sub>2DME</sub>** –  $E = -1376.085624$  Hartree

| Symbol | X         | Y         | Z         |
|--------|-----------|-----------|-----------|
| C      | 4.7793720 | 0.4818540 | 0.6053300 |

|   |            |            |            |
|---|------------|------------|------------|
| C | 3.6977930  | 1.5714240  | 0.6267190  |
| C | 2.5958130  | 1.2123260  | -0.3884690 |
| C | 2.2389820  | -0.2914150 | -0.2770320 |
| C | 3.4896680  | -1.1571110 | -0.1079750 |
| C | 4.5404340  | -0.9270640 | -1.1948510 |
| O | 3.1935890  | 1.6959140  | 1.9295960  |
| O | 2.9429370  | 1.5719250  | -1.7113960 |
| O | 4.2107210  | -0.7232150 | 1.0395600  |
| O | 5.2157600  | 0.2464390  | -0.7343150 |
| H | 5.6308760  | 0.7228840  | 1.2444320  |
| H | 4.1320190  | 2.5373170  | 0.3486460  |
| H | 2.7433530  | 0.8663490  | 2.1432040  |
| H | 1.6983830  | 1.7824990  | -0.1240890 |
| H | 3.8963870  | 1.4725750  | -1.8105130 |
| H | 1.7305810  | -0.5798640 | -1.2150080 |
| H | 3.2205740  | -2.2050880 | 0.0371270  |
| H | 5.2490870  | -1.7589030 | -1.2423930 |
| H | 4.1140250  | -0.7416130 | -2.1838240 |
| O | 1.4245890  | -0.5104810 | 0.8477020  |
| H | 0.6135490  | 0.0999160  | 0.7429930  |
| O | -0.6870960 | 0.7904860  | 0.4158740  |
| C | -1.0947370 | 0.9347360  | -0.8777710 |
| C | -1.7620800 | -0.3675180 | -1.3903400 |
| H | -0.2647560 | 1.1656580  | -1.5686070 |
| H | -1.8586170 | 1.7223670  | -1.0107670 |
| C | -3.0747420 | -0.7591630 | -0.7228370 |

|   |            |            |            |
|---|------------|------------|------------|
| O | -0.7652990 | -1.4067690 | -1.1276840 |
| H | -1.8584650 | -0.3715200 | -2.4785940 |
| C | -2.9421710 | -0.9192810 | 0.8009500  |
| O | -3.4820360 | -2.0449010 | -1.1895050 |
| H | -3.8121800 | 0.0213090  | -0.9374120 |
| C | -0.6639720 | -1.8588620 | 0.0379740  |
| C | -1.7515420 | -1.8621220 | 1.0822040  |
| O | -2.8602720 | 0.2824910  | 1.4784980  |
| H | -3.8378500 | -1.4518850 | 1.1415470  |
| H | 0.1905910  | -2.5116750 | 0.1973440  |
| O | -2.1058920 | -3.2351100 | 1.0844200  |
| H | -1.3097310 | -1.6191150 | 2.0510010  |
| H | -1.9549540 | 0.6675080  | 1.2106810  |
| H | -2.7153750 | -3.3781290 | 0.3465340  |
| H | -3.7399380 | -2.0009520 | -2.1143280 |
| O | -4.8821360 | 1.9859060  | -0.5760230 |
| C | -4.2026150 | 3.0556180  | 0.0393170  |
| C | -5.7589610 | 1.3501460  | 0.3238920  |
| H | -4.9146650 | 3.8031050  | 0.4176020  |
| H | -3.5699460 | 3.5250820  | -0.7165950 |
| H | -3.5829390 | 2.6961010  | 0.8714150  |
| H | -6.5484480 | 2.0405770  | 0.6536180  |
| H | -5.2133700 | 0.9798580  | 1.2019970  |
| H | -6.2245840 | 0.5127450  | -0.2024920 |

**TS3<sub>DME</sub>** –  $E = -1452.518684$  Hartree

| Symbol | X          | Y          | Z          |
|--------|------------|------------|------------|
| O      | -3.3757650 | 1.2922590  | -0.8942840 |
| H      | -4.4174970 | -0.5576640 | 1.1035560  |
| C      | -2.1426910 | 1.0234170  | -1.2253040 |
| C      | -1.0084420 | 1.6505520  | -0.4344960 |
| C      | -0.7445020 | 0.9931780  | 0.9402680  |
| C      | -0.5495050 | -0.5324950 | 0.8545840  |
| C      | -1.7554770 | -1.3093490 | 0.3081190  |
| C      | -2.8432290 | -1.6814140 | 1.3232840  |
| O      | 0.1559050  | 1.7570660  | -1.2241550 |
| O      | -1.7060830 | 1.3288360  | 1.8945220  |
| O      | 0.5297060  | -0.8802670 | -0.0220380 |
| O      | -2.3660730 | -0.6389930 | -0.7837360 |
| O      | -3.6475120 | -0.5929520 | 1.6998490  |
| H      | -1.8933990 | 0.8699820  | -2.2839570 |
| H      | -1.3482190 | 2.6700750  | -0.2239200 |
| H      | 0.6360320  | 0.9218600  | -1.1753480 |
| H      | 0.1978160  | 1.4232380  | 1.2862770  |
| H      | -2.5452290 | 0.8654160  | 1.7320550  |
| H      | -0.3238760 | -0.9036660 | 1.8641330  |
| H      | -1.3398560 | -2.2543320 | -0.0664900 |
| H      | -3.4622010 | -2.4696280 | 0.8770950  |
| H      | -2.3681580 | -2.0934460 | 2.2201090  |
| H      | -3.3142840 | 0.0517810  | -0.6019240 |
| H      | 2.2142610  | 2.6152230  | -0.8371590 |
| C      | 1.8263800  | -0.7659190 | 0.4703930  |

|   |            |            |            |
|---|------------|------------|------------|
| C | 2.7230090  | -1.5913530 | -0.4454600 |
| C | 4.1767100  | -1.3417110 | -0.0920510 |
| C | 4.4838230  | 0.1442390  | -0.1841970 |
| C | 3.5284620  | 0.9230570  | 0.7149500  |
| C | 3.6102450  | 2.4309040  | 0.5037390  |
| O | 2.4776110  | -2.9709090 | -0.3064500 |
| O | 5.0482400  | -2.0136900 | -0.9711160 |
| O | 5.7916140  | 0.4149300  | 0.2572140  |
| O | 2.1825160  | 0.5868520  | 0.4139370  |
| O | 3.1619100  | 2.7992410  | -0.7748580 |
| H | 1.8810850  | -1.1410230 | 1.5088980  |
| H | 2.5437040  | -1.2576480 | -1.4786990 |
| H | 1.5926660  | -3.1581290 | -0.6342160 |
| H | 4.3526700  | -1.6729580 | 0.9452590  |
| H | 4.8149650  | -2.9481250 | -0.9691670 |
| H | 4.3391470  | 0.4767120  | -1.2229570 |
| H | 3.7600480  | 0.6816980  | 1.7648400  |
| H | 3.0255210  | 2.9268150  | 1.2905580  |
| H | 4.6531140  | 2.7440150  | 0.5934800  |
| H | 6.3915480  | -0.1462520 | -0.2456200 |
| O | -5.6725830 | -0.5161630 | -0.1531800 |
| C | -6.3074270 | 0.7485670  | -0.0837860 |
| C | -5.6277990 | -1.0136490 | -1.4733830 |
| H | -5.7734520 | 1.4764040  | -0.7039320 |
| H | -6.2801040 | 1.0706620  | 0.9587240  |
| H | -7.3518500 | 0.6640380  | -0.4097700 |

|   |            |            |            |
|---|------------|------------|------------|
| H | -5.1051800 | -0.3087550 | -2.1325850 |
| H | -6.6444380 | -1.1819730 | -1.8514980 |
| H | -5.0880620 | -1.9621250 | -1.4533460 |

4DME - E = -1452.577749 Hartree

| Symbol | X          | Y          | Z          |
|--------|------------|------------|------------|
| O      | -3.4110270 | 1.8820850  | -0.2790920 |
| H      | -4.0485170 | 0.0929000  | 0.7355950  |
| C      | -2.3630220 | 1.6857850  | -0.8391350 |
| C      | -0.9938470 | 1.8631880  | -0.2019030 |
| C      | -0.7202020 | 1.0737160  | 1.1063090  |
| C      | -0.5887850 | -0.4682050 | 1.0154250  |
| C      | -1.7912450 | -1.3059540 | 0.5726820  |
| C      | -2.9929570 | -1.3518480 | 1.5167660  |
| O      | 0.0078910  | 1.6905730  | -1.1768140 |
| O      | -1.5860940 | 1.4469950  | 2.1351870  |
| O      | 0.4472640  | -0.8584560 | 0.1072520  |
| O      | -2.1497180 | -0.8982760 | -0.7298670 |
| O      | -3.7315510 | -0.1598150 | 1.6159330  |
| H      | -2.3130330 | 1.4265830  | -1.9164020 |
| H      | -0.9640930 | 2.9166370  | 0.1054790  |
| H      | 0.2366670  | 0.7527990  | -1.2118010 |
| H      | 0.2723430  | 1.4162210  | 1.4092440  |
| H      | -2.4871250 | 1.1359380  | 1.9438160  |
| H      | -0.3172180 | -0.7976750 | 2.0299880  |
| H      | -1.4069400 | -2.3397830 | 0.5431250  |

|   |            |            |            |
|---|------------|------------|------------|
| H | -3.6421230 | -2.1726900 | 1.1734140  |
| H | -2.6500520 | -1.6028340 | 2.5252480  |
| H | -3.0650530 | -1.1585610 | -0.9092970 |
| H | 2.1415830  | 2.4060630  | -0.9892640 |
| C | 1.7676880  | -0.7562380 | 0.5322400  |
| C | 2.5925780  | -1.6448290 | -0.3918600 |
| C | 4.0680660  | -1.4273290 | -0.1217670 |
| C | 4.4091750  | 0.0414730  | -0.3086610 |
| C | 3.5264850  | 0.8962780  | 0.5963300  |
| C | 3.6175160  | 2.3839910  | 0.2727580  |
| O | 2.3099070  | -3.0089010 | -0.1851010 |
| O | 4.8754520  | -2.1707740 | -1.0053900 |
| O | 5.7465450  | 0.2972720  | 0.0466110  |
| O | 2.1565990  | 0.5812700  | 0.4059610  |
| O | 3.0744700  | 2.6667850  | -0.9906530 |
| H | 1.8637980  | -1.0943250 | 1.5810080  |
| H | 2.3697850  | -1.3463300 | -1.4272810 |
| H | 1.3970630  | -3.1697430 | -0.4442890 |
| H | 4.2864620  | -1.7104750 | 0.9217600  |
| H | 4.6026450  | -3.0931100 | -0.9552930 |
| H | 4.2173310  | 0.3221270  | -1.3549560 |
| H | 3.8245790  | 0.7200140  | 1.6423580  |
| H | 3.1009740  | 2.9452400  | 1.0640770  |
| H | 4.6679810  | 2.6839060  | 0.2596720  |
| H | 6.3018410  | -0.3095570 | -0.4544200 |
| O | -4.9819020 | -0.7878660 | -0.9288800 |



|   |            |            |            |
|---|------------|------------|------------|
| C | -5.2289130 | 0.0659260  | -2.0295490 |
| C | -6.1688020 | -1.1523410 | -0.2567970 |
| H | -5.8935850 | -0.4256380 | -2.7512370 |
| H | -4.2689360 | 0.2752990  | -2.5047500 |
| H | -5.6724680 | 1.0099250  | -1.6941560 |
| H | -6.8343030 | -1.7140070 | -0.9243900 |
| H | -6.6928000 | -0.2607410 | 0.1104540  |
| H | -5.8918910 | -1.7769970 | 0.5941000  |

**TS4<sub>DME</sub>** –  $E = -1452.522573$  Hartree

| Symbol | X          | Y          | Z          |
|--------|------------|------------|------------|
| C      | -2.9676930 | 2.4119870  | -0.7306870 |
| C      | -2.0386620 | 1.4366010  | -1.0325430 |
| C      | -1.5194500 | 1.1948210  | 0.9573120  |
| C      | -0.7697160 | -0.1426910 | 0.8961820  |
| C      | -1.6806580 | -1.3776850 | 0.9386080  |
| C      | -0.8783370 | -2.6701600 | 0.8671460  |
| O      | -3.9948940 | 2.1748870  | 0.0183470  |
| O      | -0.9576560 | 1.8291570  | -1.7725420 |
| O      | -2.5802910 | 1.2237310  | 1.6722740  |
| O      | 0.0827110  | -0.1892790 | -0.2411740 |
| O      | -2.3648460 | -1.4349290 | 2.1742020  |
| O      | 0.0189230  | -2.7702180 | 1.9517850  |
| H      | -2.7658920 | 3.4490650  | -1.0153900 |
| H      | -2.3705260 | 0.4019720  | -1.0949180 |
| H      | -0.8427790 | 2.0624900  | 0.9558220  |

|   |            |            |            |
|---|------------|------------|------------|
| H | -0.1544750 | -0.1506050 | 1.8076760  |
| H | -2.3845420 | -1.3469260 | 0.0929340  |
| H | -2.7563160 | -0.5627590 | 2.3282150  |
| H | -0.2419840 | 1.2141610  | -1.5700860 |
| H | -3.5755630 | 1.6633040  | 0.8809470  |
| H | 2.6511680  | 2.9458050  | 0.4837520  |
| H | -0.5015370 | -2.6436870 | 2.7539700  |
| H | -1.5873380 | -3.5078980 | 0.8641830  |
| H | -0.2842550 | -2.7184540 | -0.0487410 |
| C | 1.4221910  | -0.4622210 | 0.0345790  |
| C | 2.1156650  | -0.7846210 | -1.2814560 |
| C | 3.5921200  | -1.0023870 | -1.0012130 |
| C | 4.1775680  | 0.2094230  | -0.2936290 |
| C | 3.3584680  | 0.5370740  | 0.9543920  |
| C | 3.7825260  | 1.8463470  | 1.5989380  |
| O | 1.6177740  | -1.9643350 | -1.8678780 |
| O | 4.3287720  | -1.1991530 | -2.1851990 |
| O | 5.4975450  | -0.0415990 | 0.1217970  |
| O | 1.9859700  | 0.6913790  | 0.6051630  |
| O | 3.5803920  | 2.9398230  | 0.7358400  |
| H | 1.5010200  | -1.3095000 | 0.7362370  |
| H | 2.0015160  | 0.0772060  | -1.9580290 |
| H | 0.7120250  | -1.8129570 | -2.1548980 |
| H | 3.6926720  | -1.8778740 | -0.3386970 |
| H | 3.9496250  | -1.9499720 | -2.6541830 |
| H | 4.1363980  | 1.0720360  | -0.9750190 |

|   |            |            |            |
|---|------------|------------|------------|
| H | 3.4743830  | -0.2827560 | 1.6809520  |
| H | 3.2271330  | 1.9734010  | 2.5379580  |
| H | 4.8501900  | 1.8017660  | 1.8232400  |
| H | 5.9951010  | -0.3373160 | -0.6481130 |
| O | -4.3585180 | -0.7659650 | -1.0211830 |
| C | -5.1736540 | -0.9582570 | 0.1111010  |
| C | -5.0475530 | -0.1122420 | -2.0587630 |
| H | -5.5320980 | 0.0049400  | 0.5001420  |
| H | -4.5737020 | -1.4603080 | 0.8736640  |
| H | -6.0418610 | -1.5857930 | -0.1352280 |
| H | -5.4178690 | 0.8662020  | -1.7246530 |
| H | -5.8962840 | -0.7176100 | -2.4071240 |
| H | -4.3481440 | 0.0281330  | -2.8858530 |

$5_{\text{DME}} - E = -1223.571794$  Hartree

| Symbol | X         | Y          | Z          |
|--------|-----------|------------|------------|
| C      | 2.4142710 | 2.0643690  | -0.2467660 |
| C      | 2.3546500 | 0.5496650  | -0.1712500 |
| C      | 3.6505990 | -0.0783610 | 0.3514210  |
| C      | 3.5432170 | -1.5956170 | 0.3941090  |
| O      | 3.4351020 | 2.6999620  | -0.2872380 |
| O      | 1.2630010 | 0.2154440  | 0.6633600  |
| O      | 4.7152320 | 0.2140460  | -0.5256040 |
| O      | 3.2811700 | -2.1206390 | -0.8880230 |
| H      | 1.4221110 | 2.5569710  | -0.2601850 |
| H      | 2.1826760 | 0.1880480  | -1.1956700 |

|   |            |            |            |
|---|------------|------------|------------|
| H | 3.8485960  | 0.3000750  | 1.3656920  |
| H | 4.8098540  | 1.1735180  | -0.5738720 |
| H | -2.0333790 | 1.8098620  | -1.1753390 |
| H | 3.9817760  | -1.8084700 | -1.4720270 |
| H | 4.4796030  | -1.9959000 | 0.8033170  |
| H | 2.7189050  | -1.9052670 | 1.0422560  |
| C | 0.3038940  | -0.5989680 | 0.0639020  |
| C | -0.6504030 | -1.0748980 | 1.1474640  |
| C | -1.7335670 | -1.9093520 | 0.4912130  |
| C | -2.4244540 | -1.0980930 | -0.5917220 |
| C | -1.3979720 | -0.5470290 | -1.5830720 |
| C | -2.0142250 | 0.4412100  | -2.5590290 |
| O | 0.0019810  | -1.8888240 | 2.0967380  |
| O | -2.7206000 | -2.3114620 | 1.4146780  |
| O | -3.3269860 | -1.8954070 | -1.3201480 |
| O | -0.3791060 | 0.1676530  | -0.8908570 |
| O | -2.6126740 | 1.5277290  | -1.8986000 |
| H | 0.7945850  | -1.4611140 | -0.4251010 |
| H | -1.1080050 | -0.1922940 | 1.6162870  |
| H | 0.6336660  | -1.3462130 | 2.5784910  |
| H | -1.2649400 | -2.7934260 | 0.0279550  |
| H | -2.2842080 | -2.7901380 | 2.1272420  |
| H | -2.9383380 | -0.2509090 | -0.1153130 |
| H | -0.9569240 | -1.3886440 | -2.1413670 |
| H | -1.2268500 | 0.7789090  | -3.2478280 |
| H | -2.7911410 | -0.0667820 | -3.1354110 |

|   |            |            |            |
|---|------------|------------|------------|
| H | -3.9138460 | -2.3220390 | -0.6868160 |
| O | -2.1113540 | 2.1158940  | 0.8265350  |
| C | -1.2686740 | 2.5079360  | 1.8789880  |
| C | -3.4668870 | 2.4130290  | 1.0731410  |
| H | -1.2749990 | 3.5994280  | 2.0071320  |
| H | -0.2587850 | 2.1716230  | 1.6328860  |
| H | -1.5812320 | 2.0438100  | 2.8264340  |
| H | -3.6086250 | 3.4897390  | 1.2395080  |
| H | -3.8295750 | 1.8658310  | 1.9545570  |
| H | -4.0297460 | 2.1048580  | 0.1900540  |

**TS5<sub>DME</sub>** –  $E = -1223.511766$  Hartree

| Symbol | X         | Y          | Z          |
|--------|-----------|------------|------------|
| O      | 3.4693980 | 1.3685010  | -0.9102150 |
| O      | 2.1940070 | -1.7930710 | 0.0390210  |
| C      | 2.6916500 | 0.5608940  | -0.3052960 |
| C      | 2.3773460 | -0.8037960 | -0.9402450 |
| H      | 2.9013300 | 2.5509860  | -0.7707040 |
| H      | 3.0288470 | -1.8738820 | 0.5235490  |
| H      | 2.7310020 | 0.4887120  | 0.7946430  |
| H      | 3.2247240 | -1.0313730 | -1.5987980 |
| H      | 1.4733970 | -0.7942230 | -1.5531120 |
| C      | 1.2598060 | 2.5312170  | 0.1854180  |
| C      | 0.8254510 | 1.3644030  | -0.4098450 |
| O      | 2.1453270 | 3.2737420  | -0.3854940 |
| O      | 0.0566920 | 0.4802570  | 0.3024700  |

|   |            |            |            |
|---|------------|------------|------------|
| H | 0.9914280  | 2.7393800  | 1.2257720  |
| H | 0.7958940  | 1.2890310  | -1.4941140 |
| H | -3.3702060 | 2.2066160  | 1.6000310  |
| C | -1.1428970 | 0.0827260  | -0.2817110 |
| C | -1.5000780 | -1.2817090 | 0.2933100  |
| C | -2.8755260 | -1.6751570 | -0.2133670 |
| C | -3.8918680 | -0.5923180 | 0.0998220  |
| C | -3.4123560 | 0.7413130  | -0.4713850 |
| C | -4.3009460 | 1.9046460  | -0.0622650 |
| O | -0.6043760 | -2.2726280 | -0.1336080 |
| O | -3.3250850 | -2.8751250 | 0.3715860  |
| O | -5.1350520 | -0.8830610 | -0.4929680 |
| O | -2.1127500 | 1.0463130  | 0.0230100  |
| O | -4.2888160 | 2.0990670  | 1.3318040  |
| H | -1.0223050 | 0.0021460  | -1.3789310 |
| H | -1.5221380 | -1.1919130 | 1.3897600  |
| H | 0.2883910  | -2.1079640 | 0.2103490  |
| H | -2.8176470 | -1.7891570 | -1.3093820 |
| H | -2.6382330 | -3.5386310 | 0.2424260  |
| H | -3.9898650 | -0.4929390 | 1.1907520  |
| H | -3.3938410 | 0.6670650  | -1.5710380 |
| H | -3.9662100 | 2.8073180  | -0.5910520 |
| H | -5.3303490 | 1.6847780  | -0.3525330 |
| H | -5.3761540 | -1.7794830 | -0.2354920 |
| O | 4.8843540  | -1.1589570 | 0.6931360  |
| C | 5.6922100  | -1.2086210 | -0.4632120 |

|   |           |            |            |
|---|-----------|------------|------------|
| C | 5.2671050 | -0.1077660 | 1.5536170  |
| H | 5.5814370 | -0.2872620 | -1.0514130 |
| H | 5.3690570 | -2.0673830 | -1.0552300 |
| H | 6.7475910 | -1.3412160 | -0.1909010 |
| H | 5.1784350 | 0.8615460  | 1.0443250  |
| H | 6.3024850 | -0.2455970 | 1.8916030  |
| H | 4.6039740 | -0.1318470 | 2.4204950  |

**TS<sub>6DME</sub>** –  $E = -1452.516586$  Hartree

| Symbol | X          | Y          | Z          |
|--------|------------|------------|------------|
| O      | -3.4816870 | 0.9297450  | -1.2045310 |
| H      | -3.6641830 | -2.3441650 | -0.6636360 |
| C      | -3.1914630 | 0.3326990  | -0.1045830 |
| C      | -1.7797700 | 0.0960210  | 0.0238850  |
| C      | -1.2332530 | -0.8617630 | 1.0917630  |
| C      | -0.5104120 | -2.1088310 | 0.5235860  |
| C      | -1.2788870 | -2.9814530 | -0.4774660 |
| C      | -2.5162120 | -3.6886240 | 0.0716850  |
| O      | -1.1537260 | 0.4360490  | -1.0751520 |
| O      | -2.2430810 | -1.2251710 | 1.9966950  |
| O      | 0.6921820  | -1.8076980 | -0.1663220 |
| O      | -1.7109450 | -2.2640310 | -1.6103590 |
| O      | -3.6104630 | -2.7935180 | 0.1914890  |
| H      | -3.9566640 | 0.1529990  | 0.6419330  |
| H      | -2.1180020 | 1.0952590  | 0.6895090  |
| H      | -2.5119720 | 0.9028090  | -1.6284060 |

|   |            |            |            |
|---|------------|------------|------------|
| H | -0.4917490 | -0.3188390 | 1.6772950  |
| H | -2.9074990 | -1.7518770 | 1.5201220  |
| H | -0.2806670 | -2.7266720 | 1.4069230  |
| H | -0.5617250 | -3.7619690 | -0.7750620 |
| H | -2.7833900 | -4.5044520 | -0.6094930 |
| H | -2.3248570 | -4.1100980 | 1.0620840  |
| H | -1.1795500 | -1.4566870 | -1.7217570 |
| H | 0.3877960  | 1.7186070  | -1.0828070 |
| C | 1.6607930  | -1.0408960 | 0.4734780  |
| C | 2.9593000  | -1.2635940 | -0.2926340 |
| C | 4.0063910  | -0.2756410 | 0.1792830  |
| C | 3.4930840  | 1.1380850  | -0.0302100 |
| C | 2.1749830  | 1.3254730  | 0.7148080  |
| C | 1.4374280  | 2.5930120  | 0.2884810  |
| O | 3.4655530  | -2.5625290 | -0.0846670 |
| O | 5.2095060  | -0.4072580 | -0.5428460 |
| O | 4.4000820  | 2.0868090  | 0.4793260  |
| O | 1.2571180  | 0.2931860  | 0.4037010  |
| O | 0.9895550  | 2.4839350  | -1.0380580 |
| H | 1.7790160  | -1.3639230 | 1.5265200  |
| H | 2.7486470  | -1.0846830 | -1.3567630 |
| H | 2.8561270  | -3.1913910 | -0.4829460 |
| H | 4.1912070  | -0.4314440 | 1.2557520  |
| H | 5.4777000  | -1.3316910 | -0.5073280 |
| H | 3.3175090  | 1.2966070  | -1.1044370 |
| H | 2.3891530  | 1.3524960  | 1.7954720  |



|   |            |           |            |
|---|------------|-----------|------------|
| H | 0.5950270  | 2.7590050 | 0.9769710  |
| H | 2.1176030  | 3.4462130 | 0.3507630  |
| H | 5.2599150  | 1.9060470 | 0.0848290  |
| O | -2.3176540 | 3.2048680 | 0.3974950  |
| C | -3.6027650 | 3.4900180 | 0.8864810  |
| C | -2.0465530 | 3.8901500 | -0.8070160 |
| H | -3.7144190 | 4.5617460 | 1.1020440  |
| H | -3.7409720 | 2.9289720 | 1.8145800  |
| H | -4.3748880 | 3.1943760 | 0.1605500  |
| H | -2.1063790 | 4.9767700 | -0.6521530 |
| H | -2.7722190 | 3.6044570 | -1.5822070 |
| H | -1.0380760 | 3.6185060 | -1.1217500 |

7DME - E = -1452.585978 Hartree

| Symbol | X          | Y          | Z          |
|--------|------------|------------|------------|
| O      | -0.0055870 | 3.1335860  | 0.6117390  |
| H      | 4.9555510  | -0.0382690 | 0.7569840  |
| C      | 0.8459810  | 2.7293810  | -0.4253180 |
| C      | 1.6183440  | 1.4773850  | -0.0659340 |
| C      | 2.0453120  | 0.5595120  | -1.2161580 |
| C      | 2.0076890  | -0.9353000 | -0.8104590 |
| C      | 3.1359780  | -1.5601960 | 0.0317040  |
| C      | 4.5493480  | -1.3954230 | -0.5414730 |
| O      | 1.8891150  | 1.2500070  | 1.0919540  |
| O      | 3.2456430  | 1.0079380  | -1.7795580 |
| O      | 0.8235860  | -1.1896960 | -0.0677970 |

|   |            |            |            |
|---|------------|------------|------------|
| O | 3.1608450  | -1.1379330 | 1.3737750  |
| O | 5.0889680  | -0.1316740 | -0.1961590 |
| H | 1.5806430  | 3.5189420  | -0.6365240 |
| H | 0.2871080  | 2.5460620  | -1.3497640 |
| H | -0.0850290 | 2.4049440  | 1.2558290  |
| H | 1.2924400  | 0.6747990  | -2.0000650 |
| H | 3.9836780  | 0.8457520  | -1.1616330 |
| H | 1.9867060  | -1.5074370 | -1.7515140 |
| H | 2.9039290  | -2.6343050 | 0.0304400  |
| H | 5.1840150  | -2.1894410 | -0.1323680 |
| H | 4.5581520  | -1.4665210 | -1.6322740 |
| H | 2.6718170  | -0.2995510 | 1.4484990  |
| H | -1.6695820 | 2.6929240  | -0.2381090 |
| C | -0.3983920 | -1.1684050 | -0.7193360 |
| C | -1.3812560 | -1.8707150 | 0.2106610  |
| C | -2.7677560 | -1.8302820 | -0.3937530 |
| C | -3.1524560 | -0.3930840 | -0.6915040 |
| C | -2.0839150 | 0.2657240  | -1.5623610 |
| C | -2.3891990 | 1.7374000  | -1.8025170 |
| O | -1.0347200 | -3.2212560 | 0.4062170  |
| O | -3.7376610 | -2.3601530 | 0.4824560  |
| O | -4.3699720 | -0.3344250 | -1.3950690 |
| O | -0.8075630 | 0.1633390  | -0.9385510 |
| O | -2.5342070 | 2.4724970  | -0.6172860 |
| H | -0.3287760 | -1.6989180 | -1.6892920 |
| H | -1.3821530 | -1.3105290 | 1.1561230  |

|   |            |            |            |
|---|------------|------------|------------|
| H | -0.1745320 | -3.2482900 | 0.8383020  |
| H | -2.7617150 | -2.3972830 | -1.3396920 |
| H | -3.4615260 | -3.2491200 | 0.7296400  |
| H | -3.2136460 | 0.1632940  | 0.2549080  |
| H | -2.0623020 | -0.2478920 | -2.5390780 |
| H | -1.6113940 | 2.1594030  | -2.4545720 |
| H | -3.3412030 | 1.7899780  | -2.3373790 |
| H | -5.0191830 | -0.8397990 | -0.8943990 |
| O | -0.9431410 | 0.9669250  | 2.1585300  |
| C | -0.2705460 | 0.1495530  | 3.0888590  |
| C | -2.1982970 | 1.4055420  | 2.6336440  |
| H | 0.0356810  | 0.7267370  | 3.9715010  |
| H | 0.6104010  | -0.2599700 | 2.5924170  |
| H | -0.9201280 | -0.6751300 | 3.4166400  |
| H | -2.0859600 | 1.9910880  | 3.5562970  |
| H | -2.8523990 | 0.5454740  | 2.8370490  |
| H | -2.6480390 | 2.0232990  | 1.8536690  |

**TS7<sub>DME</sub>** –  $E = -1452.531185$  Hartree

| Symbol | X          | Y          | Z          |
|--------|------------|------------|------------|
| O      | -3.0915780 | 2.3934260  | -0.4774950 |
| H      | -4.1049690 | -1.1390100 | 0.5538280  |
| C      | -2.6085700 | 1.6445940  | 0.6017170  |
| C      | -1.4233810 | 0.7987990  | 0.1774000  |
| C      | -0.7754190 | -0.0571960 | 1.2717360  |
| C      | -0.4002270 | -1.4014090 | 0.6067560  |

|   |            |            |            |
|---|------------|------------|------------|
| C | -1.5300280 | -1.6896030 | -0.3971370 |
| C | -2.7432210 | -2.4545480 | 0.1205560  |
| O | -0.6613810 | 1.3329330  | -0.7611280 |
| O | -1.6016880 | -0.2559480 | 2.3837510  |
| O | 0.7736840  | -1.3872350 | -0.1903690 |
| O | -1.9627130 | -0.4107990 | -0.8699030 |
| O | -3.4974250 | -1.7192980 | 1.0543310  |
| H | -3.4166230 | 1.0275860  | 0.9969240  |
| H | -2.2445030 | 2.2851840  | 1.4201540  |
| H | -2.3156020 | 2.6165140  | -1.0132590 |
| H | 0.1120590  | 0.4718990  | 1.6153500  |
| H | -2.3800020 | -0.7753020 | 2.1135480  |
| H | -0.3171380 | -2.1696610 | 1.3872240  |
| H | -1.1000500 | -2.2437120 | -1.2375230 |
| H | -3.3704230 | -2.7302400 | -0.7360030 |
| H | -2.4062320 | -3.3784980 | 0.6024120  |
| H | -1.1481980 | 0.2603580  | -1.3530180 |
| H | 1.2993310  | 2.3081410  | -0.7895640 |
| C | 1.9591180  | -0.9212730 | 0.3722650  |
| C | 3.0871990  | -1.4282300 | -0.5197610 |
| C | 4.3922340  | -0.7630060 | -0.1287040 |
| C | 4.2448310  | 0.7478660  | -0.2033930 |
| C | 3.0900500  | 1.1859450  | 0.6910000  |
| C | 2.6999140  | 2.6498430  | 0.5007270  |
| O | 3.2632890  | -2.8216100 | -0.3968790 |
| O | 5.4434740  | -1.1365110 | -0.9903510 |

|   |            |            |            |
|---|------------|------------|------------|
| O | 5.4087060  | 1.3894250  | 0.2595340  |
| O | 1.9126250  | 0.4733080  | 0.3591140  |
| O | 2.0974110  | 2.8584550  | -0.7480530 |
| H | 2.0804100  | -1.3032320 | 1.4042350  |
| H | 2.8376260  | -1.1483120 | -1.5533980 |
| H | 2.4783030  | -3.2582230 | -0.7406720 |
| H | 4.6377270  | -1.0399740 | 0.9104970  |
| H | 5.4881710  | -2.0984280 | -1.0063030 |
| H | 4.0177780  | 1.0371760  | -1.2402580 |
| H | 3.3771840  | 1.0075600  | 1.7405260  |
| H | 2.0258760  | 2.9382120  | 1.3206950  |
| H | 3.5971200  | 3.2713980  | 0.5530260  |
| H | 6.1543480  | 1.0294580  | -0.2324260 |
| O | -5.1686990 | -0.1740970 | -0.4740940 |
| C | -5.9490750 | 0.8571710  | 0.0951910  |
| C | -4.9563070 | 0.0233740  | -1.8579970 |
| H | -5.4683540 | 1.8313950  | -0.0573710 |
| H | -6.0402920 | 0.6501270  | 1.1635420  |
| H | -6.9509650 | 0.8688650  | -0.3532420 |
| H | -4.4136940 | 0.9595210  | -2.0282940 |
| H | -5.9182640 | 0.0435260  | -2.3870160 |
| H | -4.3589640 | -0.8126860 | -2.2234270 |

**8**<sub>DME</sub> –  $E = -1452.596507$  Hartree

| Symbol | X         | Y         | Z          |
|--------|-----------|-----------|------------|
| O      | 3.9269670 | 2.4171760 | -0.9603280 |

|   |            |            |            |
|---|------------|------------|------------|
| H | 4.8322340  | -1.4707010 | -0.1352180 |
| C | 3.4151820  | 1.2357990  | -1.5179700 |
| C | 2.4080300  | 0.5709990  | -0.5874350 |
| C | 1.7144510  | -0.6615750 | -1.1973820 |
| C | 1.3762060  | -1.4982670 | 0.0490070  |
| C | 2.4948140  | -1.1269830 | 1.0387230  |
| C | 3.6039490  | -2.1626310 | 1.1772120  |
| O | 1.5032010  | 1.5711760  | -0.2335480 |
| O | 2.5371300  | -1.3835260 | -2.0734620 |
| O | 0.1497290  | -1.1581990 | 0.6888720  |
| O | 3.0899030  | 0.0676520  | 0.5539830  |
| O | 4.3358640  | -2.2911660 | -0.0282720 |
| H | 4.2554430  | 0.5640700  | -1.6997180 |
| H | 2.9130560  | 1.4211480  | -2.4778760 |
| H | 3.1772490  | 2.9190410  | -0.6217500 |
| H | 0.8327840  | -0.3525730 | -1.7617230 |
| H | 3.2119230  | -1.8564070 | -1.5613760 |
| H | 1.3674650  | -2.5641450 | -0.2117230 |
| H | 2.0374360  | -0.9526700 | 2.0212080  |
| H | 4.2708780  | -1.8697840 | 1.9959200  |
| H | 3.1834360  | -3.1449390 | 1.4088450  |
| H | 0.6601870  | 1.2265820  | 0.0995510  |
| H | -1.6691530 | 2.7125590  | 0.1518740  |
| C | -0.9800040 | -1.1007770 | -0.1174150 |
| C | -2.1778860 | -1.6220340 | 0.6640700  |
| C | -3.4238800 | -1.4405570 | -0.1829000 |

|   |            |            |            |
|---|------------|------------|------------|
| C | -3.5721240 | 0.0127320  | -0.6052250 |
| C | -2.2962690 | 0.5011110  | -1.2894140 |
| C | -2.3142660 | 2.0006360  | -1.5506890 |
| O | -2.0499450 | -2.9971590 | 0.9433730  |
| O | -4.5930220 | -1.8003240 | 0.5166200  |
| O | -4.6263040 | 0.1602690  | -1.5243800 |
| O | -1.1718440 | 0.2488100  | -0.4542970 |
| O | -2.4829840 | 2.7425910  | -0.3724770 |
| H | -0.8448330 | -1.7123310 | -1.0281950 |
| H | -2.2721840 | -1.0361450 | 1.5891090  |
| H | -1.3186120 | -3.1177950 | 1.5565530  |
| H | -3.3192950 | -2.0581230 | -1.0907150 |
| H | -4.4980220 | -2.7119200 | 0.8120230  |
| H | -3.7424480 | 0.6291940  | 0.2898770  |
| H | -2.1806430 | -0.0339060 | -2.2469830 |
| H | -1.3845020 | 2.2718820  | -2.0696370 |
| H | -3.1593520 | 2.2243840  | -2.2065000 |
| H | -5.4174630 | -0.2166460 | -1.1249280 |
| O | -0.4650550 | 2.4378280  | 1.6320820  |
| C | 0.6847330  | 3.0061730  | 2.2190870  |
| C | -1.1302780 | 1.5492280  | 2.4970880  |
| H | 0.4171780  | 3.5532180  | 3.1327520  |
| H | 1.1190370  | 3.6921770  | 1.4923590  |
| H | 1.4247930  | 2.2303870  | 2.4569530  |
| H | -1.3609150 | 2.0358500  | 3.4541160  |
| H | -0.5186060 | 0.6541080  | 2.6820590  |

|   |            |           |           |
|---|------------|-----------|-----------|
| H | -2.0621280 | 1.2593430 | 2.0072680 |
|---|------------|-----------|-----------|

**TS8<sub>DME</sub>** –  $E = -1452.483832$  Hartree

| Symbol | X          | Y          | Z          |
|--------|------------|------------|------------|
| O      | 3.3326740  | -1.8813100 | 0.6934380  |
| H      | 3.5837570  | 4.2013500  | 1.2947150  |
| C      | 3.4350780  | -0.9667120 | -0.3433480 |
| C      | 2.7440900  | 0.2731700  | -0.1316710 |
| C      | 1.6303040  | 0.5287710  | 0.8475940  |
| C      | 0.9247830  | 1.7613790  | 0.2407450  |
| C      | 1.9725290  | 2.3166110  | -0.7409750 |
| C      | 2.6178140  | 3.6137210  | -0.3156460 |
| O      | 1.2597730  | -0.7216200 | -1.8196490 |
| O      | 2.2415220  | 0.8075870  | 2.0827030  |
| O      | -0.2512170 | 1.5028640  | -0.4655830 |
| O      | 3.0303090  | 1.3152030  | -0.8220530 |
| O      | 3.0888690  | 3.4307190  | 1.0071260  |
| H      | 2.6718220  | -1.1744870 | -1.2305510 |
| H      | 4.4422550  | -0.8468130 | -0.7520520 |
| H      | 2.7190110  | -2.5839130 | 0.4150510  |
| H      | 0.9674150  | -0.3224640 | 0.9618620  |
| H      | 2.6798620  | 1.6687130  | 2.0277090  |
| H      | 0.7327010  | 2.4746790  | 1.0546600  |
| H      | 1.5402970  | 2.3822280  | -1.7412870 |
| H      | 3.4414070  | 3.8559340  | -0.9967890 |
| H      | 1.8632300  | 4.4087770  | -0.3656950 |



|   |            |            |            |
|---|------------|------------|------------|
| H | 1.1444400  | -0.4305480 | -2.7288550 |
| H | -0.1949620 | -1.0625390 | -1.4514970 |
| C | -1.4084560 | 1.4188320  | 0.3349240  |
| C | -2.6050920 | 1.3937960  | -0.6077950 |
| C | -3.7772930 | 0.8223540  | 0.1648720  |
| C | -3.4905220 | -0.6473410 | 0.4118790  |
| C | -2.0681940 | -0.8645270 | 0.9630630  |
| C | -1.2573570 | -1.7905500 | 0.0631000  |
| O | -2.9416880 | 2.7046750  | -1.0263100 |
| O | -4.9839290 | 0.9098220  | -0.5566590 |
| O | -4.4119000 | -1.2059320 | 1.3267700  |
| O | -1.3784380 | 0.3629910  | 1.2415340  |
| O | -1.1624300 | -1.3076320 | -1.2377960 |
| H | -1.4657280 | 2.3312920  | 0.9504400  |
| H | -2.3762410 | 0.7453020  | -1.4613580 |
| H | -2.3756130 | 2.9446960  | -1.7636740 |
| H | -3.8716300 | 1.3417300  | 1.1320360  |
| H | -5.0487610 | 1.8070210  | -0.9019410 |
| H | -3.5724690 | -1.1489400 | -0.5626000 |
| H | -2.1768800 | -1.3302740 | 1.9470770  |
| H | -0.2649470 | -1.9572320 | 0.5098080  |
| H | -1.7782610 | -2.7647890 | 0.0754680  |
| H | -5.2943360 | -1.0662620 | 0.9669670  |
| O | 1.4441580  | -3.7229990 | -0.1071620 |
| C | 1.0006130  | -4.6684810 | 0.8345030  |
| C | 0.8844650  | -3.9240670 | -1.3915730 |

|   |            |            |            |
|---|------------|------------|------------|
| H | -0.0900880 | -4.6122950 | 0.9545060  |
| H | 1.4807380  | -4.4407660 | 1.7882960  |
| H | 1.2719960  | -5.6869850 | 0.5250370  |
| H | -0.2113120 | -3.9406010 | -1.3321570 |
| H | 1.2410190  | -4.8730030 | -1.8146780 |
| H | 1.1830900  | -3.0764850 | -2.0093880 |

$\mathbf{9}_{\text{DME}} - E = -1376.159323$  Hartree

| Symbol | X          | Y          | Z          |
|--------|------------|------------|------------|
| O      | 3.2239460  | 0.2434930  | 3.0716580  |
| H      | 3.9150140  | -0.6027690 | -1.5437920 |
| C      | 2.4325350  | 0.8132940  | 2.1221430  |
| C      | 2.0986600  | 0.2161300  | 0.9829900  |
| C      | 1.1672540  | 0.6771470  | -0.1008190 |
| C      | 0.5962520  | -0.6827040 | -0.5651250 |
| C      | 1.7280350  | -1.6812700 | -0.2683330 |
| C      | 2.5890660  | -2.0420980 | -1.4689820 |
| O      | 1.7825730  | 1.3758470  | -1.1560620 |
| O      | -0.5319240 | -1.0729230 | 0.2002230  |
| O      | 2.5566840  | -1.0615150 | 0.7224630  |
| O      | 3.1558400  | -0.9077060 | -2.0792290 |
| H      | 2.1027770  | 1.8137210  | 2.3656090  |
| H      | 3.3830530  | -0.6728220 | 2.8124220  |
| H      | 0.3725850  | 1.3118480  | 0.2869430  |
| H      | 2.3020000  | 0.7410270  | -1.6748850 |
| H      | 0.3373330  | -0.6470970 | -1.6305290 |

|   |            |            |            |
|---|------------|------------|------------|
| H | 1.2964620  | -2.5922640 | 0.1613250  |
| H | 3.3702380  | -2.7413220 | -1.1443950 |
| H | 1.9692530  | -2.5512910 | -2.2146470 |
| H | -2.1429180 | 2.6489250  | 1.0791430  |
| C | -1.7602150 | -0.6958610 | -0.3148630 |
| C | -2.8383450 | -1.4023740 | 0.4959310  |
| C | -4.1966280 | -0.9727550 | -0.0255440 |
| C | -4.3182630 | 0.5416650  | 0.0057080  |
| C | -3.1448270 | 1.1761270  | -0.7401560 |
| C | -3.1099460 | 2.6883250  | -0.5919620 |
| O | -2.7589480 | -2.8022670 | 0.3641080  |
| O | -5.2502730 | -1.5012250 | 0.7466330  |
| O | -5.5011520 | 0.9635180  | -0.6291950 |
| O | -1.9146140 | 0.6974300  | -0.2094010 |
| O | -2.9426540 | 3.0737580  | 0.7521500  |
| H | -1.8315130 | -0.9903780 | -1.3798450 |
| H | -2.7304190 | -1.0924120 | 1.5455350  |
| H | -1.9101350 | -3.0897610 | 0.7148110  |
| H | -4.2890390 | -1.3081770 | -1.0721670 |
| H | -5.1474150 | -2.4582820 | 0.7778430  |
| H | -4.2912320 | 0.8792670  | 1.0520190  |
| H | -3.2231630 | 0.9177300  | -1.8087430 |
| H | -2.3020610 | 3.0843960  | -1.2216960 |
| H | -4.0615870 | 3.1014900  | -0.9323630 |
| H | -6.2350300 | 0.4926910  | -0.2200060 |
| O | 5.1265190  | 0.3565320  | -0.6837010 |

|   |           |            |            |
|---|-----------|------------|------------|
| C | 5.6201180 | 0.0536920  | 0.6012950  |
| C | 5.0232230 | 1.7479810  | -0.9040030 |
| H | 6.6611840 | 0.3893170  | 0.6994880  |
| H | 5.5767030 | -1.0299870 | 0.7246040  |
| H | 5.0125200 | 0.5348320  | 1.3773560  |
| H | 6.0085660 | 2.2230220  | -0.8101790 |
| H | 4.3208790 | 2.2001190  | -0.1930020 |
| H | 4.6464540 | 1.8948340  | -1.9177190 |

**TS9<sub>DME</sub>** –  $E = -1376.098576$  Hartree

| Symbol | X          | Y          | Z          |
|--------|------------|------------|------------|
| O      | -3.1495660 | 1.7366730  | -2.5625450 |
| H      | -3.5046870 | -1.2050470 | 1.5161450  |
| C      | -3.6471910 | 0.6313820  | -2.1911710 |
| C      | -2.8471860 | -0.2943210 | -1.5445060 |
| C      | -1.4630430 | -0.0618950 | -1.3927090 |
| C      | -1.0169150 | -1.0259990 | -0.3118710 |
| C      | -2.1463910 | -2.0679260 | -0.3421590 |
| C      | -2.4194730 | -2.6983640 | 1.0101260  |
| O      | -1.2760190 | 1.6819340  | -0.9050590 |
| O      | 0.2335640  | -1.6303840 | -0.5372760 |
| O      | -3.3041340 | -1.3371550 | -0.7248560 |
| O      | -2.8092030 | -1.7178800 | 1.9468160  |
| H      | -4.7184520 | 0.4398650  | -2.3366700 |
| H      | -2.0245400 | 1.9272940  | -1.6071250 |
| H      | -0.8048940 | 0.1290240  | -2.2339040 |

|   |            |            |            |
|---|------------|------------|------------|
| H | -1.6456310 | 1.7522660  | -0.0004570 |
| H | -1.0390040 | -0.5147210 | 0.6573140  |
| H | -1.9093320 | -2.8343130 | -1.0955060 |
| H | -3.1931350 | -3.4695500 | 0.9036860  |
| H | -1.5071350 | -3.1722340 | 1.3849560  |
| H | 0.7321900  | 2.4304190  | -1.2560760 |
| C | 1.2874200  | -1.0120910 | 0.1350480  |
| C | 2.5862600  | -1.5284760 | -0.4680010 |
| C | 3.7532330  | -0.7615950 | 0.1269250  |
| C | 3.5528340  | 0.7361100  | -0.0516030 |
| C | 2.2068960  | 1.1367390  | 0.5455080  |
| C | 1.8420440  | 2.5967170  | 0.3047920  |
| O | 2.7911630  | -2.8947490 | -0.1916960 |
| O | 4.9725570  | -1.1079070 | -0.4879680 |
| O | 4.5534900  | 1.4563460  | 0.6261150  |
| O | 1.1752530  | 0.3694620  | -0.0536260 |
| O | 1.5765320  | 2.8518510  | -1.0471990 |
| H | 1.2374200  | -1.2463270 | 1.2175410  |
| H | 2.5446250  | -1.3409530 | -1.5505790 |
| H | 2.1082500  | -3.4046070 | -0.6382490 |
| H | 3.7998530  | -0.9762890 | 1.2079080  |
| H | 5.0783280  | -2.0632430 | -0.4263880 |
| H | 3.5461450  | 0.9776820  | -1.1246670 |
| H | 2.2440830  | 0.9469450  | 1.6331530  |
| H | 0.9741580  | 2.8508250  | 0.9314980  |
| H | 2.6841970  | 3.2224450  | 0.6104270  |

|   |            |           |           |
|---|------------|-----------|-----------|
| H | 5.4061000  | 1.1221140 | 0.3276210 |
| O | -2.1249460 | 1.4115410 | 1.6772340 |
| C | -1.1439680 | 1.1159660 | 2.6494720 |
| C | -3.4136510 | 1.5595630 | 2.2292940 |
| H | -1.0846460 | 1.9172910 | 3.3971070 |
| H | -0.1860160 | 1.0378070 | 2.1278270 |
| H | -1.3756940 | 0.1625910 | 3.1409930 |
| H | -3.4590140 | 2.4426940 | 2.8792950 |
| H | -3.6831470 | 0.6729880 | 2.8182340 |
| H | -4.1147600 | 1.6823240 | 1.4015190 |

**10<sub>DME</sub>** –  $E = -1299.736329$  Hartree

| Symbol | X          | Y          | Z          |
|--------|------------|------------|------------|
| O      | -3.5923980 | 3.1799540  | 0.4414640  |
| H      | -4.7849010 | -1.3849920 | 1.4212570  |
| C      | -4.0447050 | 2.1730620  | -0.0320610 |
| C      | -3.3243560 | 0.8774420  | -0.0133370 |
| C      | -2.1241030 | 0.5907810  | 0.4864570  |
| C      | -1.8354830 | -0.8592490 | 0.2108810  |
| C      | -3.0993750 | -1.3039130 | -0.5574130 |
| C      | -3.8465010 | -2.4464000 | 0.1024300  |
| O      | -0.7018020 | -1.0602560 | -0.6259730 |
| O      | -3.9796510 | -0.1645700 | -0.6026310 |
| O      | -4.1837300 | -2.1366850 | 1.4329930  |
| H      | -5.0359160 | 2.1489730  | -0.5242260 |
| H      | -1.4609740 | 1.2764210  | 0.9905600  |

|   |            |            |            |
|---|------------|------------|------------|
| H | -1.7028920 | -1.4383290 | 1.1349830  |
| H | -2.8235370 | -1.5612860 | -1.5857250 |
| H | -4.7362100 | -2.6944880 | -0.4905760 |
| H | -3.1974170 | -3.3271080 | 0.1324780  |
| H | 1.6396300  | 2.1137270  | 0.7503180  |
| C | 0.4938850  | -1.2421050 | 0.0561050  |
| C | 1.5888810  | -1.4635190 | -0.9775600 |
| C | 2.9100220  | -1.6192170 | -0.2488500 |
| C | 3.1620390  | -0.4110810 | 0.6375220  |
| C | 1.9733150  | -0.1879570 | 1.5728850  |
| C | 2.0845900  | 1.1075780  | 2.3586870  |
| O | 1.3767520  | -2.6393030 | -1.7254780 |
| O | 3.9952630  | -1.7269450 | -1.1420410 |
| O | 4.3010500  | -0.6065560 | 1.4409660  |
| O | 0.7693590  | -0.0968920 | 0.8171830  |
| O | 2.2165230  | 2.2266440  | 1.5218030  |
| H | 0.4156490  | -2.1199690 | 0.7277000  |
| H | 1.6299900  | -0.5727830 | -1.6220030 |
| H | 0.5545930  | -2.5425380 | -2.2155200 |
| H | 2.8546380  | -2.5179070 | 0.3882850  |
| H | 3.8125400  | -2.4538480 | -1.7466600 |
| H | 3.2740330  | 0.4753390  | -0.0032380 |
| H | 1.9118730  | -1.0346250 | 2.2765240  |
| H | 1.1956740  | 1.1921010  | 3.0009880  |
| H | 2.9719930  | 1.0585820  | 2.9947740  |
| H | 5.0316860  | -0.8358830 | 0.8570070  |

|   |            |           |            |
|---|------------|-----------|------------|
| O | 1.4522580  | 2.1674320 | -1.1842210 |
| C | 0.2227150  | 2.1295450 | -1.8678980 |
| C | 2.2159800  | 3.3094260 | -1.4993310 |
| H | -0.4102140 | 2.9840460 | -1.5890340 |
| H | -0.2788630 | 1.2014160 | -1.5863210 |
| H | 0.3818570  | 2.1471170 | -2.9555500 |
| H | 1.6603930  | 4.2282600 | -1.2670070 |
| H | 2.4861640  | 3.3151390 | -2.5639360 |
| H | 3.1198100  | 3.2737010 | -0.8887070 |

**TS10<sub>DME</sub>** –  $E = -1299.655448$  Hartree

| Symbol | X          | Y          | Z          |
|--------|------------|------------|------------|
| O      | -5.6049570 | 0.3552680  | 2.1264690  |
| H      | -0.8656060 | -2.5705290 | -1.1350890 |
| C      | -5.3511140 | 0.2456600  | 0.9613630  |
| C      | -3.9392840 | 0.0938330  | 0.4926250  |
| C      | -2.7680020 | 0.0926840  | 1.2393650  |
| C      | -1.7561700 | -0.0615690 | 0.3141230  |
| C      | -2.3378790 | -0.1142740 | -1.0229790 |
| C      | -1.9647700 | -1.2422120 | -1.9844620 |
| O      | -0.9711100 | 2.1408640  | -0.7128720 |
| O      | -3.7577120 | -0.0571680 | -0.7840870 |
| O      | -1.8098360 | -2.4763640 | -1.3412070 |
| H      | -6.1183480 | 0.2432930  | 0.1682350  |
| H      | -2.7114000 | 0.2042760  | 2.3094770  |
| H      | -0.6940970 | -0.1676000 | 0.4754220  |



|   |            |            |            |
|---|------------|------------|------------|
| H | -1.9991430 | 0.9105280  | -1.4095000 |
| H | -2.7725950 | -1.3221380 | -2.7182990 |
| H | -1.0508510 | -0.9285380 | -2.4921660 |
| H | 1.5641310  | -2.3316310 | -0.2360620 |
| C | 0.3030130  | 1.9082420  | -0.9740680 |
| C | 1.1683610  | 2.1637860  | 0.2748570  |
| C | 2.6088140  | 1.7671140  | 0.0537450  |
| C | 2.6513860  | 0.3027750  | -0.3334920 |
| C | 1.7964690  | 0.0743450  | -1.5795400 |
| C | 1.7307880  | -1.3988120 | -1.9664480 |
| O | 1.1170840  | 3.5223500  | 0.6327590  |
| O | 3.3975010  | 1.9125860  | 1.2231050  |
| O | 3.9666410  | -0.1369400 | -0.5858070 |
| O | 0.4813040  | 0.5035610  | -1.3474300 |
| O | 1.0158640  | -2.1752210 | -1.0217560 |
| H | 0.7209930  | 2.5063570  | -1.8179900 |
| H | 0.7509000  | 1.5402080  | 1.0858760  |
| H | 0.1937040  | 3.7853630  | 0.5173900  |
| H | 3.0342640  | 2.3722680  | -0.7626500 |
| H | 3.2656330  | 2.8080740  | 1.5530570  |
| H | 2.2084300  | -0.2737120 | 0.4949220  |
| H | 2.2576330  | 0.6285720  | -2.4162540 |
| H | 1.1960650  | -1.4925240 | -2.9162960 |
| H | 2.7478050  | -1.7823370 | -2.1042470 |
| H | 4.5390580  | 0.2900770  | 0.0619840  |
| O | 2.1652180  | -2.4543750 | 1.5340460  |

|   |           |            |           |
|---|-----------|------------|-----------|
| C | 3.4250550 | -2.0862430 | 2.0539510 |
| C | 1.1025600 | -2.0344500 | 2.3559210 |
| H | 3.4837760 | -0.9984130 | 2.2032200 |
| H | 4.1796990 | -2.3909780 | 1.3286670 |
| H | 3.6046020 | -2.5893270 | 3.0129740 |
| H | 1.1047860 | -0.9392420 | 2.4705010 |
| H | 1.1735190 | -2.4918890 | 3.3513790 |
| H | 0.1716990 | -2.3519070 | 1.8799280 |

### In the Presence of Acetone (Ace)

The Cartesian coordinates for all the stable structures in the presence of Ace reported in this work are listed below including computed absolute energies.

$$1_{\text{Ace}} - E = -1490.721073 \text{ Hartree}$$

| Symbol | X         | Y          | Z          |
|--------|-----------|------------|------------|
| C      | 4.4723610 | -0.0807840 | 0.0800450  |
| C      | 3.6671400 | 1.0682450  | -0.5162170 |
| C      | 2.2500110 | 1.0753340  | 0.0363330  |
| C      | 1.6457240 | -0.3224630 | -0.0608550 |
| C      | 2.5751610 | -1.3817170 | 0.5348620  |
| C      | 2.0538330 | -2.7966200 | 0.3559990  |
| O      | 5.6964660 | -0.1009770 | -0.5718510 |
| O      | 4.2778190 | 2.2932010  | -0.2009780 |
| O      | 1.5157600 | 2.0149270  | -0.6920720 |
| O      | 0.4235560 | -0.3292670 | 0.6626270  |
| O      | 3.8321550 | -1.3196120 | -0.1182510 |
| O      | 1.8310710 | -3.1032310 | -1.0038840 |

|   |            |            |            |
|---|------------|------------|------------|
| H | 4.6011540  | 0.0855580  | 1.1651730  |
| H | 3.6149460  | 0.9117240  | -1.6044420 |
| H | 2.3046500  | 1.3501160  | 1.1055930  |
| H | 1.4607730  | -0.5480310 | -1.1183050 |
| H | 2.6933300  | -1.1816070 | 1.6133320  |
| H | 6.2672860  | -0.7525800 | -0.1543180 |
| H | 5.1611260  | 2.2868580  | -0.5832350 |
| H | 0.5838880  | 2.0083160  | -0.4281480 |
| H | -2.5190140 | 2.3465200  | -1.2604260 |
| H | 2.6581860  | -2.9568150 | -1.4755350 |
| H | 2.7765740  | -3.4917700 | 0.8031310  |
| H | 1.0995770  | -2.9062130 | 0.8778990  |
| C | -0.6548160 | -0.8950650 | 0.0060800  |
| C | -1.6782040 | -1.3283980 | 1.0460480  |
| C | -2.9565450 | -1.7632140 | 0.3500370  |
| C | -3.4494920 | -0.6658790 | -0.5721150 |
| C | -2.3397670 | -0.3105440 | -1.5645730 |
| C | -2.7250390 | 0.8419130  | -2.4796980 |
| O | -1.1314840 | -2.3745000 | 1.8075470  |
| O | -3.8909830 | -2.0743100 | 1.3602670  |
| O | -4.6140660 | -1.1499140 | -1.2104110 |
| O | -1.1972920 | 0.0983350  | -0.8334170 |
| O | -3.2392580 | 1.9405580  | -1.7702460 |
| H | -0.3398350 | -1.7636030 | -0.5994840 |
| H | -1.8994130 | -0.4545950 | 1.6810530  |
| H | -1.8535220 | -2.7776620 | 2.3028040  |

|   |            |            |            |
|---|------------|------------|------------|
| H | -2.7399700 | -2.6604890 | -0.2534740 |
| H | -4.7282190 | -2.2767890 | 0.9285620  |
| H | -3.6775370 | 0.2260280  | 0.0255540  |
| H | -2.1052680 | -1.1960860 | -2.1793040 |
| H | -1.8450830 | 1.1184600  | -3.0744740 |
| H | -3.5048150 | 0.5038130  | -3.1697350 |
| O | -1.2307040 | 2.8797110  | 0.0424560  |
| C | -1.4707510 | 2.6836060  | 1.2148160  |
| C | -2.8862680 | 2.5592500  | 1.7182310  |
| C | -0.3585360 | 2.5339420  | 2.2191040  |
| H | -2.9922030 | 1.6633310  | 2.3385460  |
| H | -3.1094470 | 3.4182540  | 2.3600140  |
| H | -3.5891890 | 2.5326680  | 0.8846590  |
| H | 0.5456670  | 3.0195780  | 1.8478460  |
| H | -0.1568100 | 1.4606190  | 2.3281540  |
| H | -0.6405050 | 2.9310210  | 3.1965720  |
| H | -5.1195070 | -0.4016300 | -1.5408920 |

**TS1<sub>Ace</sub> – E = -1490.636406 Hartree**

| Symbol | X          | Y          | Z          |
|--------|------------|------------|------------|
| O      | -4.3831700 | 1.2226000  | -1.1087640 |
| H      | -4.9412620 | -0.4552230 | 0.0095730  |
| C      | -3.2239960 | 1.0590270  | -1.3850780 |
| C      | -2.0638100 | 1.5689960  | -0.5411080 |
| C      | -2.0015210 | 1.0962620  | 0.9400170  |
| C      | -1.6752780 | -0.3854180 | 1.2507350  |

|   |            |            |            |
|---|------------|------------|------------|
| C | -2.5963880 | -1.4927190 | 0.7228410  |
| C | -3.9993530 | -1.5831620 | 1.3063470  |
| O | -0.8594590 | 1.3930880  | -1.2503350 |
| O | -3.1274920 | 1.5127800  | 1.6538550  |
| O | -0.4061410 | -0.7788650 | 0.7228930  |
| O | -2.7051100 | -1.4308720 | -0.6829060 |
| O | -4.8548240 | -0.5185160 | 0.9695110  |
| H | -2.9130130 | 0.5763120  | -2.3329120 |
| H | -2.2270280 | 2.6509730  | -0.4643430 |
| H | -0.6113230 | 0.4562790  | -1.2292350 |
| H | -1.1566940 | 1.6565360  | 1.3516530  |
| H | -3.9113050 | 1.0265010  | 1.3447000  |
| H | -1.6489170 | -0.4552310 | 2.3492810  |
| H | -2.0997970 | -2.4308720 | 1.0200420  |
| H | -4.4286500 | -2.5370670 | 0.9746730  |
| H | -3.9330990 | -1.5991030 | 2.3984300  |
| H | -1.8366150 | -1.5882350 | -1.0829000 |
| H | 0.9722840  | 2.3234210  | -1.0057830 |
| C | 0.7602790  | -0.3240560 | 1.3207850  |
| C | 1.8498960  | -1.3020580 | 0.8914590  |
| C | 3.2195200  | -0.7729500 | 1.2575280  |
| C | 3.4118580  | 0.6013100  | 0.6415500  |
| C | 2.2924090  | 1.5324750  | 1.0982460  |
| C | 2.2768140  | 2.8505230  | 0.3283670  |
| O | 1.6890730  | -2.5604370 | 1.5009120  |
| O | 4.2443190  | -1.6082590 | 0.7637950  |

|   |            |            |            |
|---|------------|------------|------------|
| O | 4.6324400  | 1.1716240  | 1.0427440  |
| O | 1.0248480  | 0.9600650  | 0.8329030  |
| O | 1.8873060  | 2.6487700  | -1.0074600 |
| H | 0.6573150  | -0.3107800 | 2.4219900  |
| H | 1.7827740  | -1.3883100 | -0.2023420 |
| H | 0.8519690  | -2.9317050 | 1.2032810  |
| H | 3.2951810  | -0.6837910 | 2.3536920  |
| H | 4.0972760  | -2.4961380 | 1.1071000  |
| H | 3.3636600  | 0.5068660  | -0.4556260 |
| H | 2.4206790  | 1.7275570  | 2.1750770  |
| H | 1.5967150  | 3.5470520  | 0.8365740  |
| H | 3.2814410  | 3.2796530  | 0.3268020  |
| H | 5.3262520  | 0.5236180  | 0.8793530  |
| O | -0.1049940 | -1.3313610 | -2.1272260 |
| C | 0.9461120  | -1.1143730 | -2.6973080 |
| C | 2.0010320  | -2.1842410 | -2.8193630 |
| C | 1.2750750  | 0.2378460  | -3.2674260 |
| H | 2.1561960  | -2.4213580 | -3.8766270 |
| H | 2.9549430  | -1.8091650 | -2.4320660 |
| H | 1.7019190  | -3.0820680 | -2.2786700 |
| H | 1.8924020  | 0.7797400  | -2.5366990 |
| H | 0.3670130  | 0.8174370  | -3.4342130 |
| H | 1.8594210  | 0.1473960  | -4.1857310 |

$2_{\text{Ace}} - E = -1414.300347$  Hartree

| Symbol | X | Y | Z |
|--------|---|---|---|
|--------|---|---|---|

|   |            |            |            |
|---|------------|------------|------------|
| O | -4.3831700 | 1.2226000  | -1.1087640 |
| H | -4.9412620 | -0.4552230 | 0.0095730  |
| C | -3.2239960 | 1.0590270  | -1.3850780 |
| C | -2.0638100 | 1.5689960  | -0.5411080 |
| C | -2.0015210 | 1.0962620  | 0.9400170  |
| C | -1.6752780 | -0.3854180 | 1.2507350  |
| C | -2.5963880 | -1.4927190 | 0.7228410  |
| C | -3.9993530 | -1.5831620 | 1.3063470  |
| O | -0.8594590 | 1.3930880  | -1.2503350 |
| O | -3.1274920 | 1.5127800  | 1.6538550  |
| O | -0.4061410 | -0.7788650 | 0.7228930  |
| O | -2.7051100 | -1.4308720 | -0.6829060 |
| O | -4.8548240 | -0.5185160 | 0.9695110  |
| H | -2.9130130 | 0.5763120  | -2.3329120 |
| H | -2.2270280 | 2.6509730  | -0.4643430 |
| H | -0.6113230 | 0.4562790  | -1.2292350 |
| H | -1.1566940 | 1.6565360  | 1.3516530  |
| H | -3.9113050 | 1.0265010  | 1.3447000  |
| H | -1.6489170 | -0.4552310 | 2.3492810  |
| H | -2.0997970 | -2.4308720 | 1.0200420  |
| H | -4.4286500 | -2.5370670 | 0.9746730  |
| H | -3.9330990 | -1.5991030 | 2.3984300  |
| H | -1.8366150 | -1.5882350 | -1.0829000 |
| H | 0.9722840  | 2.3234210  | -1.0057830 |
| C | 0.7602790  | -0.3240560 | 1.3207850  |
| C | 1.8498960  | -1.3020580 | 0.8914590  |

|   |            |            |            |
|---|------------|------------|------------|
| C | 3.2195200  | -0.7729500 | 1.2575280  |
| C | 3.4118580  | 0.6013100  | 0.6415500  |
| C | 2.2924090  | 1.5324750  | 1.0982460  |
| C | 2.2768140  | 2.8505230  | 0.3283670  |
| O | 1.6890730  | -2.5604370 | 1.5009120  |
| O | 4.2443190  | -1.6082590 | 0.7637950  |
| O | 4.6324400  | 1.1716240  | 1.0427440  |
| O | 1.0248480  | 0.9600650  | 0.8329030  |
| O | 1.8873060  | 2.6487700  | -1.0074600 |
| H | 0.6573150  | -0.3107800 | 2.4219900  |
| H | 1.7827740  | -1.3883100 | -0.2023420 |
| H | 0.8519690  | -2.9317050 | 1.2032810  |
| H | 3.2951810  | -0.6837910 | 2.3536920  |
| H | 4.0972760  | -2.4961380 | 1.1071000  |
| H | 3.3636600  | 0.5068660  | -0.4556260 |
| H | 2.4206790  | 1.7275570  | 2.1750770  |
| H | 1.5967150  | 3.5470520  | 0.8365740  |
| H | 3.2814410  | 3.2796530  | 0.3268020  |
| H | 5.3262520  | 0.5236180  | 0.8793530  |
| O | -0.1049940 | -1.3313610 | -2.1272260 |
| C | 0.9461120  | -1.1143730 | -2.6973080 |
| C | 2.0010320  | -2.1842410 | -2.8193630 |
| C | 1.2750750  | 0.2378460  | -3.2674260 |
| H | 2.1561960  | -2.4213580 | -3.8766270 |
| H | 2.9549430  | -1.8091650 | -2.4320660 |
| H | 1.7019190  | -3.0820680 | -2.2786700 |



|   |           |           |            |
|---|-----------|-----------|------------|
| H | 1.8924020 | 0.7797400 | -2.5366990 |
| H | 0.3670130 | 0.8174370 | -3.4342130 |
| H | 1.8594210 | 0.1473960 | -4.1857310 |

**TS2<sub>Ace</sub>** –  $E = -1414.211849$  Hartree

| Symbol | X          | Y          | Z          |
|--------|------------|------------|------------|
| O      | -4.3831700 | 1.2226000  | -1.1087640 |
| H      | -4.9412620 | -0.4552230 | 0.0095730  |
| C      | -3.2239960 | 1.0590270  | -1.3850780 |
| C      | -2.0638100 | 1.5689960  | -0.5411080 |
| C      | -2.0015210 | 1.0962620  | 0.9400170  |
| C      | -1.6752780 | -0.3854180 | 1.2507350  |
| C      | -2.5963880 | -1.4927190 | 0.7228410  |
| C      | -3.9993530 | -1.5831620 | 1.3063470  |
| O      | -0.8594590 | 1.3930880  | -1.2503350 |
| O      | -3.1274920 | 1.5127800  | 1.6538550  |
| O      | -0.4061410 | -0.7788650 | 0.7228930  |
| O      | -2.7051100 | -1.4308720 | -0.6829060 |
| O      | -4.8548240 | -0.5185160 | 0.9695110  |
| H      | -2.9130130 | 0.5763120  | -2.3329120 |
| H      | -2.2270280 | 2.6509730  | -0.4643430 |
| H      | -0.6113230 | 0.4562790  | -1.2292350 |
| H      | -1.1566940 | 1.6565360  | 1.3516530  |
| H      | -3.9113050 | 1.0265010  | 1.3447000  |
| H      | -1.6489170 | -0.4552310 | 2.3492810  |
| H      | -2.0997970 | -2.4308720 | 1.0200420  |

|   |            |            |            |
|---|------------|------------|------------|
| H | -4.4286500 | -2.5370670 | 0.9746730  |
| H | -3.9330990 | -1.5991030 | 2.3984300  |
| H | -1.8366150 | -1.5882350 | -1.0829000 |
| H | 0.9722840  | 2.3234210  | -1.0057830 |
| C | 0.7602790  | -0.3240560 | 1.3207850  |
| C | 1.8498960  | -1.3020580 | 0.8914590  |
| C | 3.2195200  | -0.7729500 | 1.2575280  |
| C | 3.4118580  | 0.6013100  | 0.6415500  |
| C | 2.2924090  | 1.5324750  | 1.0982460  |
| C | 2.2768140  | 2.8505230  | 0.3283670  |
| O | 1.6890730  | -2.5604370 | 1.5009120  |
| O | 4.2443190  | -1.6082590 | 0.7637950  |
| O | 4.6324400  | 1.1716240  | 1.0427440  |
| O | 1.0248480  | 0.9600650  | 0.8329030  |
| O | 1.8873060  | 2.6487700  | -1.0074600 |
| H | 0.6573150  | -0.3107800 | 2.4219900  |
| H | 1.7827740  | -1.3883100 | -0.2023420 |
| H | 0.8519690  | -2.9317050 | 1.2032810  |
| H | 3.2951810  | -0.6837910 | 2.3536920  |
| H | 4.0972760  | -2.4961380 | 1.1071000  |
| H | 3.3636600  | 0.5068660  | -0.4556260 |
| H | 2.4206790  | 1.7275570  | 2.1750770  |
| H | 1.5967150  | 3.5470520  | 0.8365740  |
| H | 3.2814410  | 3.2796530  | 0.3268020  |
| H | 5.3262520  | 0.5236180  | 0.8793530  |
| O | -0.1049940 | -1.3313610 | -2.1272260 |

|   |           |            |            |
|---|-----------|------------|------------|
| C | 0.9461120 | -1.1143730 | -2.6973080 |
| C | 2.0010320 | -2.1842410 | -2.8193630 |
| C | 1.2750750 | 0.2378460  | -3.2674260 |
| H | 2.1561960 | -2.4213580 | -3.8766270 |
| H | 2.9549430 | -1.8091650 | -2.4320660 |
| H | 1.7019190 | -3.0820680 | -2.2786700 |
| H | 1.8924020 | 0.7797400  | -2.5366990 |
| H | 0.3670130 | 0.8174370  | -3.4342130 |
| H | 1.8594210 | 0.1473960  | -4.1857310 |

**TS3<sub>Ace</sub>** –  $E = -1490.634469$  Hartree

| Symbol | X          | Y          | Z          |
|--------|------------|------------|------------|
| O      | 3.0715520  | -1.1937860 | -1.0160310 |
| H      | 3.5284980  | -0.9021360 | 0.6877790  |
| C      | 1.7740400  | -0.9226010 | -1.1556700 |
| C      | 0.7210680  | -1.7664460 | -0.4233500 |
| C      | 0.3434090  | -1.3230470 | 1.0122320  |
| C      | 0.3120300  | 0.2103670  | 1.1326740  |
| C      | 1.6170170  | 0.8978100  | 0.7375920  |
| C      | 2.8337700  | 0.6794320  | 1.6436080  |
| O      | -0.4326430 | -1.8716110 | -1.2368000 |
| O      | 1.1005690  | -1.9089910 | 2.0293350  |
| O      | -0.6551630 | 0.7871200  | 0.2527070  |
| O      | 1.9122580  | 0.5815350  | -0.6392020 |
| O      | 3.3933890  | -0.6146000 | 1.6182720  |
| H      | 1.4319010  | -0.7358110 | -2.1818940 |

|   |            |            |            |
|---|------------|------------|------------|
| H | 1.1510110  | -2.7698800 | -0.3530700 |
| H | -0.9688780 | -1.0786340 | -1.1070420 |
| H | -0.6753860 | -1.6847360 | 1.1574000  |
| H | 2.0284970  | -1.6132890 | 1.9753450  |
| H | 0.0792010  | 0.4754690  | 2.1733030  |
| H | 1.4148160  | 1.9750640  | 0.7474500  |
| H | 3.5876490  | 1.4207980  | 1.3615420  |
| H | 2.5232700  | 0.8774640  | 2.6749890  |
| H | 2.9835260  | 0.1483500  | -0.8070110 |
| H | -2.6070750 | -2.5549830 | -1.1979730 |
| C | -1.9955540 | 0.7155470  | 0.6104600  |
| C | -2.7330100 | 1.7580660  | -0.2226450 |
| C | -4.2295440 | 1.5974960  | -0.0313290 |
| C | -4.6533290 | 0.1778690  | -0.3752040 |
| C | -3.8464940 | -0.8094770 | 0.4620890  |
| C | -4.0643080 | -2.2628520 | 0.0572600  |
| O | -2.3903850 | 3.0688680  | 0.1603390  |
| O | -4.9563360 | 2.4733620  | -0.8610790 |
| O | -6.0128300 | -0.0248670 | -0.0772830 |
| O | -2.4582450 | -0.5691790 | 0.2865970  |
| O | -3.5719770 | -2.5274290 | -1.2315510 |
| H | -2.1254500 | 0.9116220  | 1.6905780  |
| H | -2.4837730 | 1.5739580  | -1.2782820 |
| H | -1.4703810 | 3.2242590  | -0.0746460 |
| H | -4.4736760 | 1.7872780  | 1.0275510  |
| H | -4.6436540 | 3.3696220  | -0.6978160 |

|   |            |            |            |
|---|------------|------------|------------|
| H | -4.4471220 | -0.0122790 | -1.4390500 |
| H | -4.1251780 | -0.6806500 | 1.5206800  |
| H | -3.5895280 | -2.9106270 | 0.8060700  |
| H | -5.1380540 | -2.4653800 | 0.0512980  |
| H | -6.5160050 | 0.6627600  | -0.5264260 |
| O | 4.8460920  | 1.2120170  | -0.5744100 |
| C | 5.9603620  | 0.7433860  | -0.6582500 |
| C | 6.1966770  | -0.7425870 | -0.7563750 |
| C | 7.1816700  | 1.6302490  | -0.6458030 |
| H | 7.0770740  | -0.9631090 | -1.3644410 |
| H | 6.3954920  | -1.1155920 | 0.2556080  |
| H | 5.3107650  | -1.2432140 | -1.1478410 |
| H | 6.9033210  | 2.6591390  | -0.4209000 |
| H | 7.6636930  | 1.5850800  | -1.6279230 |
| H | 7.9083560  | 1.2606560  | 0.0838230  |

$4_{\text{Ace}} - E = -1490.702387$  Hartree

| Symbol | X          | Y          | Z          |
|--------|------------|------------|------------|
| O      | -4.3831700 | 1.2226000  | -1.1087640 |
| H      | -4.9412620 | -0.4552230 | 0.0095730  |
| C      | -3.2239960 | 1.0590270  | -1.3850780 |
| C      | -2.0638100 | 1.5689960  | -0.5411080 |
| C      | -2.0015210 | 1.0962620  | 0.9400170  |
| C      | -1.6752780 | -0.3854180 | 1.2507350  |
| C      | -2.5963880 | -1.4927190 | 0.7228410  |
| C      | -3.9993530 | -1.5831620 | 1.3063470  |

|   |            |            |            |
|---|------------|------------|------------|
| O | -0.8594590 | 1.3930880  | -1.2503350 |
| O | -3.1274920 | 1.5127800  | 1.6538550  |
| O | -0.4061410 | -0.7788650 | 0.7228930  |
| O | -2.7051100 | -1.4308720 | -0.6829060 |
| O | -4.8548240 | -0.5185160 | 0.9695110  |
| H | -2.9130130 | 0.5763120  | -2.3329120 |
| H | -2.2270280 | 2.6509730  | -0.4643430 |
| H | -0.6113230 | 0.4562790  | -1.2292350 |
| H | -1.1566940 | 1.6565360  | 1.3516530  |
| H | -3.9113050 | 1.0265010  | 1.3447000  |
| H | -1.6489170 | -0.4552310 | 2.3492810  |
| H | -2.0997970 | -2.4308720 | 1.0200420  |
| H | -4.4286500 | -2.5370670 | 0.9746730  |
| H | -3.9330990 | -1.5991030 | 2.3984300  |
| H | -1.8366150 | -1.5882350 | -1.0829000 |
| H | 0.9722840  | 2.3234210  | -1.0057830 |
| C | 0.7602790  | -0.3240560 | 1.3207850  |
| C | 1.8498960  | -1.3020580 | 0.8914590  |
| C | 3.2195200  | -0.7729500 | 1.2575280  |
| C | 3.4118580  | 0.6013100  | 0.6415500  |
| C | 2.2924090  | 1.5324750  | 1.0982460  |
| C | 2.2768140  | 2.8505230  | 0.3283670  |
| O | 1.6890730  | -2.5604370 | 1.5009120  |
| O | 4.2443190  | -1.6082590 | 0.7637950  |
| O | 4.6324400  | 1.1716240  | 1.0427440  |
| O | 1.0248480  | 0.9600650  | 0.8329030  |

|   |            |            |            |
|---|------------|------------|------------|
| O | 1.8873060  | 2.6487700  | -1.0074600 |
| H | 0.6573150  | -0.3107800 | 2.4219900  |
| H | 1.7827740  | -1.3883100 | -0.2023420 |
| H | 0.8519690  | -2.9317050 | 1.2032810  |
| H | 3.2951810  | -0.6837910 | 2.3536920  |
| H | 4.0972760  | -2.4961380 | 1.1071000  |
| H | 3.3636600  | 0.5068660  | -0.4556260 |
| H | 2.4206790  | 1.7275570  | 2.1750770  |
| H | 1.5967150  | 3.5470520  | 0.8365740  |
| H | 3.2814410  | 3.2796530  | 0.3268020  |
| H | 5.3262520  | 0.5236180  | 0.8793530  |
| O | -0.1049940 | -1.3313610 | -2.1272260 |
| C | 0.9461120  | -1.1143730 | -2.6973080 |
| C | 2.0010320  | -2.1842410 | -2.8193630 |
| C | 1.2750750  | 0.2378460  | -3.2674260 |
| H | 2.1561960  | -2.4213580 | -3.8766270 |
| H | 2.9549430  | -1.8091650 | -2.4320660 |
| H | 1.7019190  | -3.0820680 | -2.2786700 |
| H | 1.8924020  | 0.7797400  | -2.5366990 |
| H | 0.3670130  | 0.8174370  | -3.4342130 |
| H | 1.8594210  | 0.1473960  | -4.1857310 |

**TS4<sub>Ace</sub>** –  $E = -1490.643589$  Hartree

| Symbol | X         | Y         | Z         |
|--------|-----------|-----------|-----------|
| C      | 2.8235850 | 2.3531680 | 0.6461010 |
| C      | 1.8209820 | 1.4659030 | 0.9732680 |

|   |            |            |            |
|---|------------|------------|------------|
| C | 1.3291950  | 1.1927610  | -1.0303850 |
| C | 0.5651170  | -0.1346920 | -0.9420560 |
| C | 1.4716670  | -1.3739020 | -0.9832270 |
| C | 0.6715530  | -2.6630620 | -0.8581090 |
| O | 3.8474090  | 1.9881970  | -0.0601090 |
| O | 0.7423870  | 1.9656290  | 1.6415860  |
| O | 2.3915170  | 1.1955210  | -1.7471160 |
| O | -0.2662820 | -0.1559490 | 0.2112010  |
| O | 2.1159370  | -1.4617470 | -2.2400760 |
| O | -0.2558670 | -2.7885750 | -1.9152740 |
| H | 2.6873970  | 3.4189850  | 0.8533890  |
| H | 2.0691740  | 0.4143060  | 1.0977530  |
| H | 0.6717000  | 2.0738230  | -1.0366270 |
| H | -0.0665530 | -0.1495830 | -1.8422840 |
| H | 2.2029610  | -1.3270570 | -0.1616920 |
| H | 2.5130970  | -0.5990240 | -2.4236210 |
| H | 0.0155220  | 1.3464600  | 1.5031610  |
| H | 3.3847510  | 1.5504920  | -0.9602730 |
| H | -2.8810400 | 2.9400170  | -0.5077600 |
| H | 0.2424650  | -2.6825050 | -2.7341840 |
| H | 1.3800780  | -3.5008980 | -0.8545680 |
| H | 0.1035570  | -2.6890220 | 0.0748260  |
| C | -1.6080780 | -0.4476740 | -0.0292470 |
| C | -2.2671700 | -0.7534670 | 1.3084880  |
| C | -3.7475060 | -0.9905540 | 1.0668780  |
| C | -4.3616990 | 0.2032250  | 0.3529910  |



|   |            |            |            |
|---|------------|------------|------------|
| C | -3.5755180 | 0.5174690  | -0.9193910 |
| C | -4.0281360 | 1.8109570  | -1.5762730 |
| O | -1.7438390 | -1.9166260 | 1.9045620  |
| O | -4.4541350 | -1.1743800 | 2.2710300  |
| O | -5.6885920 | -0.0674360 | -0.0267490 |
| O | -2.1968970 | 0.6912650  | -0.6055430 |
| O | -3.8157550 | 2.9217620  | -0.7380430 |
| H | -1.6956350 | -1.3072040 | -0.7143470 |
| H | -2.1467980 | 0.1217320  | 1.9667820  |
| H | -0.8339980 | -1.7510650 | 2.1708630  |
| H | -3.8544400 | -1.8782110 | 0.4217930  |
| H | -4.0538530 | -1.9111180 | 2.7448770  |
| H | -4.3133020 | 1.0776640  | 1.0186980  |
| H | -3.7001470 | -0.3159820 | -1.6288220 |
| H | -3.4970130 | 1.9264500  | -2.5307260 |
| H | -5.1004620 | 1.7523830  | -1.7734330 |
| H | -6.1644470 | -0.3560240 | 0.7594200  |
| O | 3.9081730  | -0.8963490 | 1.4278990  |
| C | 4.9383150  | -0.5169120 | 0.9175970  |
| C | 5.9738460  | 0.2505600  | 1.7017250  |
| C | 5.2601610  | -0.7970110 | -0.5308020 |
| H | 6.9558630  | -0.2207610 | 1.5995470  |
| H | 6.0475000  | 1.2594750  | 1.2844830  |
| H | 5.6876030  | 0.3028190  | 2.7516980  |
| H | 4.4003710  | -1.2349010 | -1.0406010 |
| H | 6.1016790  | -1.4964710 | -0.5804280 |

|   |           |           |            |
|---|-----------|-----------|------------|
| H | 5.5736440 | 0.1241080 | -1.0302250 |
|---|-----------|-----------|------------|

$5_{\text{Ace}} - E = -1261.690518$  Hartree

| Symbol | X          | Y          | Z          |
|--------|------------|------------|------------|
| C      | -1.6455490 | -0.7568220 | -1.0047710 |
| C      | -1.2246310 | 0.6685430  | -0.7012470 |
| C      | -2.4235860 | 1.5599280  | -0.3204460 |
| C      | -2.0159970 | 3.0272940  | -0.3664390 |
| O      | -1.2823070 | -1.7186510 | -0.3815360 |
| O      | -0.3042620 | 0.7255900  | 0.3604590  |
| O      | -3.4827190 | 1.3994920  | -1.2351270 |
| O      | -1.7100890 | 3.4205720  | -1.6835480 |
| H      | -2.3371600 | -0.8565100 | -1.8626690 |
| H      | -0.7934520 | 1.0796470  | -1.6284910 |
| H      | -2.7343560 | 1.2955180  | 0.6985800  |
| H      | -4.0832270 | 0.7269030  | -0.8869880 |
| H      | 1.3104880  | -2.6615830 | -0.8090890 |
| H      | -2.4826000 | 3.2213360  | -2.2248590 |
| H      | -2.8358500 | 3.6294480  | 0.0467460  |
| H      | -1.1186220 | 3.1928340  | 0.2361760  |
| C      | 1.0299360  | 0.7585390  | -0.0264160 |
| C      | 1.8698230  | 0.8118290  | 1.2408390  |
| C      | 3.3352740  | 0.7333510  | 0.8598000  |
| C      | 3.5906540  | -0.5206970 | 0.0407550  |
| C      | 2.6595120  | -0.5525370 | -1.1703900 |
| C      | 2.7018980  | -1.8872240 | -1.9013590 |

|   |            |            |            |
|---|------------|------------|------------|
| O | 1.6756720  | 2.0165620  | 1.9455640  |
| O | 4.1714080  | 0.6807080  | 1.9932130  |
| O | 4.9119370  | -0.5448100 | -0.4434200 |
| O | 1.3087970  | -0.4016130 | -0.7586830 |
| O | 2.1934860  | -2.9238210 | -1.0984320 |
| H | 1.2200690  | 1.6517260  | -0.6535730 |
| H | 1.6040620  | -0.0596680 | 1.8566570  |
| H | 0.7582490  | 2.0560470  | 2.2329170  |
| H | 3.5867130  | 1.6127130  | 0.2435930  |
| H | 3.9708030  | 1.4420320  | 2.5478750  |
| H | 3.3835480  | -1.4020600 | 0.6654550  |
| H | 2.9480830  | 0.2593290  | -1.8574460 |
| H | 2.1324200  | -1.7943360 | -2.8364410 |
| H | 3.7384860  | -2.1325000 | -2.1424980 |
| H | 5.4995330  | -0.4180460 | 0.3091670  |
| O | -4.3705200 | -0.7845580 | 0.3046470  |
| C | -3.8682160 | -1.6059360 | 1.0437430  |
| C | -3.9559620 | -3.0803280 | 0.7617650  |
| C | -3.0807340 | -1.1891950 | 2.2597920  |
| H | -2.9431720 | -3.4938060 | 0.7307180  |
| H | -4.4945320 | -3.5785390 | 1.5740370  |
| H | -4.4625430 | -3.2556700 | -0.1864810 |
| H | -3.3729000 | -0.1879410 | 2.5782520  |
| H | -2.0218330 | -1.1818670 | 1.9700370  |
| H | -3.1979490 | -1.9012350 | 3.0794720  |

**TSS<sub>Ace</sub> - E = -1261.63339 Hartree**

| Symbol | X          | Y          | Z          |
|--------|------------|------------|------------|
| O      | 3.2703960  | 1.1667560  | -0.9381820 |
| O      | 1.8280290  | -1.8957180 | 0.1926020  |
| C      | 2.5061450  | 0.3966750  | -0.2651690 |
| C      | 2.1594480  | -0.9916170 | -0.8262690 |
| H      | 2.7246990  | 2.3842970  | -0.7839810 |
| H      | 2.6362040  | -2.1025330 | 0.6813270  |
| H      | 2.5958390  | 0.3722910  | 0.8347850  |
| H      | 3.0483030  | -1.3189860 | -1.3807350 |
| H      | 1.3202360  | -0.9646900 | -1.5255070 |
| C      | 1.1097800  | 2.3877380  | 0.2068360  |
| C      | 0.6566440  | 1.2228110  | -0.3791830 |
| O      | 2.0143770  | 3.1116680  | -0.3616260 |
| O      | -0.1559690 | 0.3777450  | 0.3300090  |
| H      | 0.8337970  | 2.6164580  | 1.2400820  |
| H      | 0.6387050  | 1.1343160  | -1.4628550 |
| H      | -3.5058470 | 2.3143630  | 1.5344020  |
| C      | -1.3669880 | 0.0361280  | -0.2667090 |
| C      | -1.8077370 | -1.2940890 | 0.3283580  |
| C      | -3.1944820 | -1.6217700 | -0.1944820 |
| C      | -4.1545240 | -0.4783750 | 0.0791520  |
| C      | -3.5921820 | 0.8150640  | -0.5091230 |
| C      | -4.4218540 | 2.0337780  | -0.1397510 |
| O      | -0.9600620 | -2.3394980 | -0.0628960 |
| O      | -3.7192960 | -2.7828640 | 0.4060120  |

|   |            |            |            |
|---|------------|------------|------------|
| O | -5.4018220 | -0.7119670 | -0.5302120 |
| O | -2.2863430 | 1.0581430  | 0.0029230  |
| O | -4.4240930 | 2.2560130  | 1.2502120  |
| H | -1.2335450 | -0.0729750 | -1.3599920 |
| H | -1.8427330 | -1.1801970 | 1.4223550  |
| H | -0.0602720 | -2.1985920 | 0.2748340  |
| H | -3.1248330 | -1.7615500 | -1.2868400 |
| H | -3.0667620 | -3.4848030 | 0.3048350  |
| H | -4.2653830 | -0.3515410 | 1.1659800  |
| H | -3.5586110 | 0.7172150  | -1.6065750 |
| H | -4.0277390 | 2.9054590  | -0.6796110 |
| H | -5.4564690 | 1.8654410  | -0.4454660 |
| H | -5.6955180 | -1.5891170 | -0.2612090 |
| O | 4.5575700  | -1.5132740 | 0.8294480  |
| C | 5.3221990  | -0.6453500 | 0.4632210  |
| C | 5.6028580  | 0.5656500  | 1.3142420  |
| C | 5.9857380  | -0.6998400 | -0.8879430 |
| H | 6.6795460  | 0.6937000  | 1.4563220  |
| H | 5.2320120  | 1.4483560  | 0.7813240  |
| H | 5.1047550  | 0.4730300  | 2.2790970  |
| H | 5.8466190  | -1.6824100 | -1.3387390 |
| H | 7.0496290  | -0.4607720 | -0.8141000 |
| H | 5.5148140  | 0.0663980  | -1.5151440 |

**TS6<sub>Ace</sub> – E = -1490.639814 Hartree**

| Symbol | X | Y | Z |
|--------|---|---|---|
|--------|---|---|---|

|   |            |            |            |
|---|------------|------------|------------|
| O | -3.5569800 | 2.9130230  | 0.2569240  |
| H | -5.1907130 | -0.7901660 | -0.2156660 |
| C | -3.2986480 | 1.7760140  | 1.0378610  |
| C | -2.4206090 | 0.7766600  | 0.2993170  |
| C | -2.0675330 | -0.4753440 | 1.1251720  |
| C | -1.7579020 | -1.4914650 | 0.0130800  |
| C | -2.7288000 | -1.0726750 | -1.1099790 |
| C | -4.0033890 | -1.8971240 | -1.2521120 |
| O | -1.2811350 | 1.4954170  | -0.0983830 |
| O | -3.1256740 | -0.9194750 | 1.9318680  |
| O | -0.4634700 | -1.3616350 | -0.5607690 |
| O | -3.1165950 | 0.2680690  | -0.8252500 |
| O | -4.8804320 | -1.7022370 | -0.1583140 |
| H | -4.2549410 | 1.3133070  | 1.2845760  |
| H | -2.7917430 | 2.0347230  | 1.9788550  |
| H | -2.7283320 | 3.1562570  | -0.1704100 |
| H | -1.2194520 | -0.2803890 | 1.7764150  |
| H | -3.8261020 | -1.2973750 | 1.3765960  |
| H | -1.9132210 | -2.5176810 | 0.3700720  |
| H | -2.1772980 | -1.1088710 | -2.0574270 |
| H | -4.5031190 | -1.6212730 | -2.1877660 |
| H | -3.7642530 | -2.9631670 | -1.2915380 |
| H | -0.6994710 | 0.9727540  | -0.6778150 |
| H | 0.8075140  | 1.9341200  | 0.8967630  |
| C | 0.6448110  | -1.5279600 | 0.2619600  |
| C | 1.8216840  | -1.8323820 | -0.6606040 |

|   |            |            |            |
|---|------------|------------|------------|
| C | 3.1206010  | -1.7727810 | 0.1163390  |
| C | 3.2510910  | -0.4166210 | 0.7848310  |
| C | 2.0464680  | -0.1820300 | 1.6884600  |
| C | 1.9921360  | 1.2350250  | 2.2507390  |
| O | 1.7166170  | -3.1265770 | -1.2141700 |
| O | 4.2390250  | -1.9414890 | -0.7270520 |
| O | 4.4093560  | -0.3496870 | 1.5811170  |
| O | 0.8472800  | -0.3215690 | 0.9505560  |
| O | 1.6816970  | 2.1703190  | 1.2426540  |
| H | 0.4839950  | -2.3572270 | 0.9762120  |
| H | 1.8299200  | -1.0588530 | -1.4392940 |
| H | 0.9847190  | -3.1284270 | -1.8380820 |
| H | 3.1148560  | -2.5532230 | 0.8960950  |
| H | 4.1120150  | -2.7550740 | -1.2269730 |
| H | 3.2587350  | 0.3601110  | 0.0064050  |
| H | 2.0862550  | -0.9067750 | 2.5181690  |
| H | 1.2464960  | 1.2710900  | 3.0559720  |
| H | 2.9684970  | 1.4980540  | 2.6633430  |
| H | 5.1446450  | -0.6753550 | 1.0504310  |
| O | 1.0359110  | 1.1643940  | -1.7416230 |
| C | 1.6454150  | 2.2119060  | -1.6999280 |
| C | 0.9608500  | 3.5259680  | -1.4220150 |
| C | 3.1365860  | 2.2643900  | -1.9173450 |
| H | 1.4600060  | 4.0277490  | -0.5882690 |
| H | 1.0501030  | 4.1710210  | -2.3021110 |
| H | -0.0908600 | 3.3618030  | -1.1880030 |

|   |           |           |            |
|---|-----------|-----------|------------|
| H | 3.5125800 | 1.2919600 | -2.2376380 |
| H | 3.6064680 | 2.5514620 | -0.9699730 |
| H | 3.3913290 | 3.0315250 | -2.6540720 |

$7_{\text{Ace}} - E = -1490.711588$  Hartree

| Symbol | X         | Y          | Z          |
|--------|-----------|------------|------------|
| O      | 1.7660850 | 3.6378010  | -0.3788990 |
| H      | 4.8372720 | -0.4313760 | 0.5308410  |
| C      | 1.5264680 | 2.4924090  | -1.1206600 |
| C      | 2.0119250 | 1.2246100  | -0.4586690 |
| C      | 1.9388280 | -0.0334780 | -1.3287120 |
| C      | 1.7295840 | -1.3600400 | -0.5674630 |
| C      | 2.8059900 | -1.9311350 | 0.3745280  |
| C      | 4.1922150 | -2.0801420 | -0.2553330 |
| O      | 2.4680280 | 1.2295410  | 0.6628880  |
| O      | 3.0445940 | -0.0507180 | -2.1938890 |
| O      | 0.5469020 | -1.2858740 | 0.2208070  |
| O      | 2.9269250 | -1.2519120 | 1.5977410  |
| O      | 4.8576090 | -0.8324660 | -0.3472600 |
| H      | 2.0292760 | 2.5806940  | -2.0909980 |
| H      | 0.4545560 | 2.3274920  | -1.3254380 |
| H      | 1.3198770 | 3.5148800  | 0.4697900  |
| H      | 1.0612880 | 0.0825600  | -1.9749260 |
| H      | 3.8542030 | -0.1105530 | -1.6554270 |
| H      | 1.5950750 | -2.1195330 | -1.3541830 |
| H      | 2.4491880 | -2.9432540 | 0.6108140  |



|   |            |            |            |
|---|------------|------------|------------|
| H | 4.7772850  | -2.7674020 | 0.3660030  |
| H | 4.1336280  | -2.4866240 | -1.2689220 |
| H | 2.7489340  | -0.3070730 | 1.4396230  |
| H | -1.6956750 | 2.5506910  | -0.1588290 |
| C | -0.6622090 | -1.2409030 | -0.4512230 |
| C | -1.7125690 | -1.8686980 | 0.4557140  |
| C | -3.0667840 | -1.7889670 | -0.2213230 |
| C | -3.3774400 | -0.3563350 | -0.6234180 |
| C | -2.2252870 | 0.2224550  | -1.4431820 |
| C | -2.4244950 | 1.6953270  | -1.7659270 |
| O | -1.4382850 | -3.2246690 | 0.7089090  |
| O | -4.1058020 | -2.2270570 | 0.6247660  |
| O | -4.5373290 | -0.3003580 | -1.4168030 |
| O | -1.0070290 | 0.0993220  | -0.7144330 |
| O | -2.5471980 | 2.4905080  | -0.6178660 |
| H | -0.5969450 | -1.8038500 | -1.4021080 |
| H | -1.7333900 | -1.2868020 | 1.3896710  |
| H | -0.5934410 | -3.2789780 | 1.1681760  |
| H | -3.0342700 | -2.4065390 | -1.1342930 |
| H | -3.9078250 | -3.1274970 | 0.9030670  |
| H | -3.4928840 | 0.2512810  | 0.2857560  |
| H | -2.1520330 | -0.3378950 | -2.3909270 |
| H | -1.5942910 | 2.0292230  | -2.4047140 |
| H | -3.3528220 | 1.7946100  | -2.3339140 |
| H | -5.2427360 | -0.7462340 | -0.9359390 |
| O | -0.3243570 | 2.5111120  | 1.2358870  |

|   |            |           |           |
|---|------------|-----------|-----------|
| C | -0.6432510 | 1.7597540 | 2.1365430 |
| C | 0.3826120  | 0.9773420 | 2.9092060 |
| C | -2.0865410 | 1.5796360 | 2.5296740 |
| H | 1.3429030  | 1.4923980 | 2.8966490 |
| H | 0.0516260  | 0.7804700 | 3.9308730 |
| H | 0.5107470  | 0.0135320 | 2.3970430 |
| H | -2.7534480 | 2.0042980 | 1.7792970 |
| H | -2.2356110 | 2.0944150 | 3.4861050 |
| H | -2.3159100 | 0.5242320 | 2.7035880 |

**TS7<sub>Ace</sub>** –  $E = -1490.653449$  Hartree

| Symbol | X          | Y          | Z          |
|--------|------------|------------|------------|
| O      | -3.5569800 | 2.9130230  | 0.2569240  |
| H      | -5.1907130 | -0.7901660 | -0.2156660 |
| C      | -3.2986480 | 1.7760140  | 1.0378610  |
| C      | -2.4206090 | 0.7766600  | 0.2993170  |
| C      | -2.0675330 | -0.4753440 | 1.1251720  |
| C      | -1.7579020 | -1.4914650 | 0.0130800  |
| C      | -2.7288000 | -1.0726750 | -1.1099790 |
| C      | -4.0033890 | -1.8971240 | -1.2521120 |
| O      | -1.2811350 | 1.4954170  | -0.0983830 |
| O      | -3.1256740 | -0.9194750 | 1.9318680  |
| O      | -0.4634700 | -1.3616350 | -0.5607690 |
| O      | -3.1165950 | 0.2680690  | -0.8252500 |
| O      | -4.8804320 | -1.7022370 | -0.1583140 |
| H      | -4.2549410 | 1.3133070  | 1.2845760  |

|   |            |            |            |
|---|------------|------------|------------|
| H | -2.7917430 | 2.0347230  | 1.9788550  |
| H | -2.7283320 | 3.1562570  | -0.1704100 |
| H | -1.2194520 | -0.2803890 | 1.7764150  |
| H | -3.8261020 | -1.2973750 | 1.3765960  |
| H | -1.9132210 | -2.5176810 | 0.3700720  |
| H | -2.1772980 | -1.1088710 | -2.0574270 |
| H | -4.5031190 | -1.6212730 | -2.1877660 |
| H | -3.7642530 | -2.9631670 | -1.2915380 |
| H | -0.6994710 | 0.9727540  | -0.6778150 |
| H | 0.8075140  | 1.9341200  | 0.8967630  |
| C | 0.6448110  | -1.5279600 | 0.2619600  |
| C | 1.8216840  | -1.8323820 | -0.6606040 |
| C | 3.1206010  | -1.7727810 | 0.1163390  |
| C | 3.2510910  | -0.4166210 | 0.7848310  |
| C | 2.0464680  | -0.1820300 | 1.6884600  |
| C | 1.9921360  | 1.2350250  | 2.2507390  |
| O | 1.7166170  | -3.1265770 | -1.2141700 |
| O | 4.2390250  | -1.9414890 | -0.7270520 |
| O | 4.4093560  | -0.3496870 | 1.5811170  |
| O | 0.8472800  | -0.3215690 | 0.9505560  |
| O | 1.6816970  | 2.1703190  | 1.2426540  |
| H | 0.4839950  | -2.3572270 | 0.9762120  |
| H | 1.8299200  | -1.0588530 | -1.4392940 |
| H | 0.9847190  | -3.1284270 | -1.8380820 |
| H | 3.1148560  | -2.5532230 | 0.8960950  |
| H | 4.1120150  | -2.7550740 | -1.2269730 |

|   |            |            |            |
|---|------------|------------|------------|
| H | 3.2587350  | 0.3601110  | 0.0064050  |
| H | 2.0862550  | -0.9067750 | 2.5181690  |
| H | 1.2464960  | 1.2710900  | 3.0559720  |
| H | 2.9684970  | 1.4980540  | 2.6633430  |
| H | 5.1446450  | -0.6753550 | 1.0504310  |
| O | 1.0359110  | 1.1643940  | -1.7416230 |
| C | 1.6454150  | 2.2119060  | -1.6999280 |
| C | 0.9608500  | 3.5259680  | -1.4220150 |
| C | 3.1365860  | 2.2643900  | -1.9173450 |
| H | 1.4600060  | 4.0277490  | -0.5882690 |
| H | 1.0501030  | 4.1710210  | -2.3021110 |
| H | -0.0908600 | 3.3618030  | -1.1880030 |
| H | 3.5125800  | 1.2919600  | -2.2376380 |
| H | 3.6064680  | 2.5514620  | -0.9699730 |
| H | 3.3913290  | 3.0315250  | -2.6540720 |

$8_{\text{Acc}} - E = -1490.719012$  Hartree

| Symbol | X          | Y          | Z          |
|--------|------------|------------|------------|
| O      | -3.5569800 | 2.9130230  | 0.2569240  |
| H      | -5.1907130 | -0.7901660 | -0.2156660 |
| C      | -3.2986480 | 1.7760140  | 1.0378610  |
| C      | -2.4206090 | 0.7766600  | 0.2993170  |
| C      | -2.0675330 | -0.4753440 | 1.1251720  |
| C      | -1.7579020 | -1.4914650 | 0.0130800  |
| C      | -2.7288000 | -1.0726750 | -1.1099790 |
| C      | -4.0033890 | -1.8971240 | -1.2521120 |

|   |            |            |            |
|---|------------|------------|------------|
| O | -1.2811350 | 1.4954170  | -0.0983830 |
| O | -3.1256740 | -0.9194750 | 1.9318680  |
| O | -0.4634700 | -1.3616350 | -0.5607690 |
| O | -3.1165950 | 0.2680690  | -0.8252500 |
| O | -4.8804320 | -1.7022370 | -0.1583140 |
| H | -4.2549410 | 1.3133070  | 1.2845760  |
| H | -2.7917430 | 2.0347230  | 1.9788550  |
| H | -2.7283320 | 3.1562570  | -0.1704100 |
| H | -1.2194520 | -0.2803890 | 1.7764150  |
| H | -3.8261020 | -1.2973750 | 1.3765960  |
| H | -1.9132210 | -2.5176810 | 0.3700720  |
| H | -2.1772980 | -1.1088710 | -2.0574270 |
| H | -4.5031190 | -1.6212730 | -2.1877660 |
| H | -3.7642530 | -2.9631670 | -1.2915380 |
| H | -0.6994710 | 0.9727540  | -0.6778150 |
| H | 0.8075140  | 1.9341200  | 0.8967630  |
| C | 0.6448110  | -1.5279600 | 0.2619600  |
| C | 1.8216840  | -1.8323820 | -0.6606040 |
| C | 3.1206010  | -1.7727810 | 0.1163390  |
| C | 3.2510910  | -0.4166210 | 0.7848310  |
| C | 2.0464680  | -0.1820300 | 1.6884600  |
| C | 1.9921360  | 1.2350250  | 2.2507390  |
| O | 1.7166170  | -3.1265770 | -1.2141700 |
| O | 4.2390250  | -1.9414890 | -0.7270520 |
| O | 4.4093560  | -0.3496870 | 1.5811170  |
| O | 0.8472800  | -0.3215690 | 0.9505560  |

|   |            |            |            |
|---|------------|------------|------------|
| O | 1.6816970  | 2.1703190  | 1.2426540  |
| H | 0.4839950  | -2.3572270 | 0.9762120  |
| H | 1.8299200  | -1.0588530 | -1.4392940 |
| H | 0.9847190  | -3.1284270 | -1.8380820 |
| H | 3.1148560  | -2.5532230 | 0.8960950  |
| H | 4.1120150  | -2.7550740 | -1.2269730 |
| H | 3.2587350  | 0.3601110  | 0.0064050  |
| H | 2.0862550  | -0.9067750 | 2.5181690  |
| H | 1.2464960  | 1.2710900  | 3.0559720  |
| H | 2.9684970  | 1.4980540  | 2.6633430  |
| H | 5.1446450  | -0.6753550 | 1.0504310  |
| O | 1.0359110  | 1.1643940  | -1.7416230 |
| C | 1.6454150  | 2.2119060  | -1.6999280 |
| C | 0.9608500  | 3.5259680  | -1.4220150 |
| C | 3.1365860  | 2.2643900  | -1.9173450 |
| H | 1.4600060  | 4.0277490  | -0.5882690 |
| H | 1.0501030  | 4.1710210  | -2.3021110 |
| H | -0.0908600 | 3.3618030  | -1.1880030 |
| H | 3.5125800  | 1.2919600  | -2.2376380 |
| H | 3.6064680  | 2.5514620  | -0.9699730 |
| H | 3.3913290  | 3.0315250  | -2.6540720 |

**TS8<sub>Ace</sub>** –  $E = -1490.605955$  Hartree

| Symbol | X          | Y          | Z         |
|--------|------------|------------|-----------|
| O      | -2.7735750 | 2.4829230  | 0.7308350 |
| H      | -5.1746510 | -2.7996510 | 0.9215580 |

|   |            |            |            |
|---|------------|------------|------------|
| C | -2.8889980 | 1.7141070  | -0.4142490 |
| C | -2.6509840 | 0.3054740  | -0.2334360 |
| C | -1.8441600 | -0.3465240 | 0.8587070  |
| C | -1.5702250 | -1.7607140 | 0.2732440  |
| C | -2.6368280 | -1.8934680 | -0.8272680 |
| C | -3.8164460 | -2.7796950 | -0.5014570 |
| O | -0.5935370 | 0.9631380  | -1.4373690 |
| O | -2.6279100 | -0.4132310 | 2.0216360  |
| O | -0.3418520 | -1.9974180 | -0.3651940 |
| O | -3.1486490 | -0.5492780 | -1.0535510 |
| O | -4.3380020 | -2.3630950 | 0.7455600  |
| H | -1.9372350 | 1.7530690  | -1.1230050 |
| H | -3.7912860 | 1.9179030  | -0.9986100 |
| H | -1.9115980 | 2.9447770  | 0.7370780  |
| H | -0.9431630 | 0.2208880  | 1.0666350  |
| H | -3.3901710 | -0.9860440 | 1.8604400  |
| H | -1.7239080 | -2.4891510 | 1.0811940  |
| H | -2.1630790 | -2.2034280 | -1.7601110 |
| H | -4.5676500 | -2.6862820 | -1.2938050 |
| H | -3.4661830 | -3.8189250 | -0.4599100 |
| H | -0.3149130 | 0.6208210  | -2.2918380 |
| H | 0.8497910  | 1.4140590  | -0.8152020 |
| C | 0.8310460  | -1.8502050 | 0.3854390  |
| C | 1.9391580  | -2.4506910 | -0.4711960 |
| C | 3.2890840  | -2.0796840 | 0.1037590  |
| C | 3.4092060  | -0.5671390 | 0.1313680  |

|   |            |            |            |
|---|------------|------------|------------|
| C | 2.2824880  | 0.0333830  | 0.9661060  |
| C | 2.1218710  | 1.5334100  | 0.7250310  |
| O | 1.8542780  | -3.8589560 | -0.5134120 |
| O | 4.3439270  | -2.5836450 | -0.6849290 |
| O | 4.6234950  | -0.1678230 | 0.7237870  |
| O | 1.0163730  | -0.4938560 | 0.6086890  |
| O | 1.7555780  | 1.8068880  | -0.5935080 |
| H | 0.7439980  | -2.4049590 | 1.3397450  |
| H | 1.8483150  | -2.0174390 | -1.4775890 |
| H | 1.0537590  | -4.0995260 | -0.9883570 |
| H | 3.3673310  | -2.4661080 | 1.1339830  |
| H | 4.2001250  | -3.5284990 | -0.8033190 |
| H | 3.3279780  | -0.1855130 | -0.8967060 |
| H | 2.5001640  | -0.1629750 | 2.0279930  |
| H | 1.3754050  | 1.9152980  | 1.4399390  |
| H | 3.0812340  | 2.0212080  | 0.9333640  |
| H | 5.3343590  | -0.6149310 | 0.2526860  |
| O | -0.3371160 | 3.7146690  | 0.8189280  |
| C | 0.3089350  | 4.1792630  | -0.0997550 |
| C | -0.2374230 | 4.2200560  | -1.5009520 |
| C | 1.6823970  | 4.7498480  | 0.1249260  |
| H | 0.2092950  | 5.0232780  | -2.0901180 |
| H | 0.0014700  | 3.2523460  | -1.9576350 |
| H | -1.3247090 | 4.3223320  | -1.4751270 |
| H | 2.0207270  | 4.5315110  | 1.1378300  |
| H | 1.6442910  | 5.8344350  | -0.0258520 |



|   |           |           |            |
|---|-----------|-----------|------------|
| H | 2.3714980 | 4.3244520 | -0.6086310 |
|---|-----------|-----------|------------|

$9_{\text{Ace}} - E = -1414.282746$  Hartree

| Symbol | X          | Y          | Z          |
|--------|------------|------------|------------|
| O      | 3.6903870  | 0.4426690  | 2.2570720  |
| H      | 3.6834600  | -0.7584570 | -1.4832330 |
| C      | 2.6789930  | 0.9288130  | 1.4779930  |
| C      | 1.9321850  | 0.1698400  | 0.6858210  |
| C      | 0.8546690  | 0.5952560  | -0.2836880 |
| C      | 0.2292690  | -0.7710940 | -0.6506380 |
| C      | 1.3486890  | -1.7796130 | -0.3707630 |
| C      | 2.2564180  | -2.0759390 | -1.5587930 |
| O      | 1.3270470  | 1.3005740  | -1.4044910 |
| O      | -0.8578830 | -1.0953640 | 0.2027710  |
| O      | 2.1182490  | -1.1954190 | 0.6796060  |
| O      | 2.8964710  | -0.9163890 | -2.0406090 |
| H      | 2.5460780  | 1.9998990  | 1.5408010  |
| H      | 3.7335520  | -0.5124060 | 2.1145100  |
| H      | 0.1020680  | 1.2253960  | 0.1876250  |
| H      | 1.9474260  | 0.7146590  | -1.8676470 |
| H      | -0.0957200 | -0.7733400 | -1.6979470 |
| H      | 0.9227110  | -2.7145950 | 0.0060060  |
| H      | 3.0000720  | -2.8205870 | -1.2505810 |
| H      | 1.6617910  | -2.5026630 | -2.3742160 |
| H      | -2.3104180 | 2.7272910  | 0.9280410  |
| C      | -2.1065220 | -0.7172090 | -0.2568940 |

|   |            |            |            |
|---|------------|------------|------------|
| C | -3.1472650 | -1.3393910 | 0.6642330  |
| C | -4.5252530 | -0.9056070 | 0.2014720  |
| C | -4.6078680 | 0.6106200  | 0.1410940  |
| C | -3.4695660 | 1.1620640  | -0.7167810 |
| C | -3.3885600 | 2.6791930  | -0.6729130 |
| O | -3.1100870 | -2.7465500 | 0.6211220  |
| O | -5.5401530 | -1.3541800 | 1.0704740  |
| O | -5.8191600 | 1.0244150  | -0.4440970 |
| O | -2.2205910 | 0.6840630  | -0.2326830 |
| O | -3.1236730 | 3.1469150  | 0.6288050  |
| H | -2.2543670 | -1.0755600 | -1.2942380 |
| H | -2.9644400 | -0.9654750 | 1.6821560  |
| H | -2.2451820 | -3.0332950 | 0.9311370  |
| H | -4.6925920 | -1.3043630 | -0.8131540 |
| H | -5.4547260 | -2.3091540 | 1.1613960  |
| H | -4.5049360 | 1.0134570  | 1.1592270  |
| H | -3.6223690 | 0.8371650  | -1.7589170 |
| H | -2.6143600 | 3.0096830  | -1.3781120 |
| H | -4.3503680 | 3.0961610  | -0.9783920 |
| H | -6.5355530 | 0.5970040  | 0.0373360  |
| O | 5.0603550  | -0.6250880 | -0.3575310 |
| C | 5.5712070  | 0.4088450  | 0.0220940  |
| C | 5.1251820  | 1.7541830  | -0.4861750 |
| C | 6.6969170  | 0.3984360  | 1.0218500  |
| H | 5.0290270  | 2.4571810  | 0.3458270  |
| H | 5.8977480  | 2.1456630  | -1.1573400 |

|   |           |            |            |
|---|-----------|------------|------------|
| H | 4.1765970 | 1.6782260  | -1.0186520 |
| H | 7.0471130 | -0.6199380 | 1.1873030  |
| H | 6.3201710 | 0.8183110  | 1.9599060  |
| H | 7.5185600 | 1.0341690  | 0.6801740  |

**TS9<sub>Ace</sub> - E = -1414.219409 Hartree**

| Symbol | X          | Y          | Z          |
|--------|------------|------------|------------|
| O      | -3.0917540 | 1.3434630  | -1.3850480 |
| H      | -3.5001630 | -1.5536620 | 1.2293980  |
| C      | -3.0309550 | 0.1112200  | -1.7035190 |
| C      | -2.0031350 | -0.6749350 | -1.2288820 |
| C      | -0.9847210 | -0.0848730 | -0.4458920 |
| C      | -0.2365400 | -1.2303860 | 0.2099290  |
| C      | -1.1493890 | -2.4401930 | -0.0846080 |
| C      | -1.9799020 | -2.8142030 | 1.1356140  |
| O      | -1.7925140 | 0.9001020  | 0.7880620  |
| O      | 1.0288960  | -1.4209250 | -0.3972750 |
| O      | -2.0031580 | -2.0702070 | -1.1601320 |
| O      | -2.6547240 | -1.6970840 | 1.6762060  |
| H      | -3.8370170 | -0.3380800 | -2.3011000 |
| H      | -2.3947090 | 1.2970880  | 0.0513320  |
| H      | -0.4099960 | 0.7662570  | -0.7901040 |
| H      | -2.3461440 | 0.2666200  | 1.2866930  |
| H      | -0.1135520 | -1.0646430 | 1.2878200  |
| H      | -0.5460430 | -3.2974490 | -0.3999930 |
| H      | -2.6855670 | -3.6057690 | 0.8611560  |

|   |            |            |            |
|---|------------|------------|------------|
| H | -1.3154330 | -3.2015660 | 1.9168700  |
| H | 1.8262760  | 2.5851950  | -1.3311630 |
| C | 2.0780230  | -0.7520130 | 0.2125900  |
| C | 3.3700750  | -1.2105300 | -0.4487460 |
| C | 4.5266920  | -0.4542120 | 0.1780480  |
| C | 4.2956820  | 1.0444810  | 0.0748830  |
| C | 2.9335180  | 1.4068470  | 0.6655210  |
| C | 2.5668940  | 2.8633950  | 0.4339950  |
| O | 3.6041070  | -2.5839140 | -0.2448820 |
| O | 5.7508900  | -0.7412920 | -0.4573680 |
| O | 5.2717700  | 1.7536780  | 0.7989620  |
| O | 1.9131120  | 0.6335750  | 0.0440740  |
| O | 2.4822250  | 3.1694220  | -0.9373400 |
| H | 2.0991060  | -0.9876890 | 1.2944540  |
| H | 3.3073320  | -0.9688170 | -1.5195940 |
| H | 2.8992370  | -3.0788320 | -0.6743070 |
| H | 4.5812060  | -0.7258270 | 1.2456390  |
| H | 5.8770570  | -1.6960560 | -0.4464660 |
| H | 4.3047170  | 1.3337370  | -0.9860170 |
| H | 2.9528080  | 1.2064940  | 1.7492680  |
| H | 1.6187080  | 3.0724770  | 0.9475500  |
| H | 3.3481120  | 3.4969080  | 0.8589740  |
| H | 6.1351740  | 1.4598410  | 0.4893280  |
| O | -4.6213720 | 0.0651260  | 0.9943990  |
| C | -5.1759650 | 0.9916150  | 0.4393580  |
| C | -4.9269400 | 2.4187290  | 0.8513700  |

|   |            |            |            |
|---|------------|------------|------------|
| C | -6.1426710 | 0.7735850  | -0.6937300 |
| H | -4.1850420 | 2.4598630  | 1.6495330  |
| H | -4.5777900 | 2.9803570  | -0.0197790 |
| H | -5.8613740 | 2.8739350  | 1.1944750  |
| H | -6.2793380 | -0.2920380 | -0.8768320 |
| H | -5.7367670 | 1.2629580  | -1.5848540 |
| H | -7.1046010 | 1.2419970  | -0.4651450 |

$10_{\text{Ace}} - E = -1337.856552$  Hartree

| Symbol | X          | Y          | Z          |
|--------|------------|------------|------------|
| O      | 3.2587210  | 1.7990600  | 1.7565250  |
| H      | 3.5467490  | -1.4599940 | -1.1642200 |
| C      | 3.2304780  | 0.5980840  | 1.8523500  |
| C      | 2.2411430  | -0.2394530 | 1.1374060  |
| C      | 1.1721860  | 0.1433010  | 0.4399250  |
| C      | 0.5012190  | -1.0919050 | -0.0915450 |
| C      | 1.4772260  | -2.2037710 | 0.3482870  |
| C      | 2.2070790  | -2.8421360 | -0.8221420 |
| O      | -0.7804360 | -1.3375590 | 0.4841120  |
| O      | 2.4603640  | -1.5764980 | 1.1934080  |
| O      | 2.8098080  | -1.8779840 | -1.6425100 |
| H      | 3.9569590  | 0.0414150  | 2.4718840  |
| H      | 0.8347180  | 1.1568180  | 0.2940950  |
| H      | 0.3980460  | -1.0723550 | -1.1851380 |
| H      | 0.9498700  | -2.9558080 | 0.9426490  |
| H      | 2.9394940  | -3.5635200 | -0.4365710 |

|   |            |            |            |
|---|------------|------------|------------|
| H | 1.4790850  | -3.3877110 | -1.4333140 |
| H | -1.7932380 | 2.5650690  | 1.2681630  |
| C | -1.8377050 | -0.7495500 | -0.1829610 |
| C | -3.1271720 | -1.2551000 | 0.4499620  |
| C | -4.3020790 | -0.5780520 | -0.2297470 |
| C | -4.1534890 | 0.9321200  | -0.1542370 |
| C | -2.7966640 | 1.3517950  | -0.7184820 |
| C | -2.5112740 | 2.8295750  | -0.5054970 |
| O | -3.2835000 | -2.6440300 | 0.2779880  |
| O | -5.5291440 | -0.9164840 | 0.3748690  |
| O | -5.1456380 | 1.5738390  | -0.9186970 |
| O | -1.7521640 | 0.6504210  | -0.0557330 |
| O | -2.4401590 | 3.1522890  | 0.8624110  |
| H | -1.8106290 | -1.0174490 | -1.2573720 |
| H | -3.1103450 | -0.9831470 | 1.5154050  |
| H | -2.5497660 | -3.0866360 | 0.7161430  |
| H | -4.3085060 | -0.8753720 | -1.2917910 |
| H | -5.6025550 | -1.8767470 | 0.3849020  |
| H | -4.2063650 | 1.2427070  | 0.8994700  |
| H | -2.7801410 | 1.1293910  | -1.7980260 |
| H | -1.5756430 | 3.0851720  | -1.0223580 |
| H | -3.3245380 | 3.4163720  | -0.9374350 |
| H | -5.9998370 | 1.2349430  | -0.6301300 |
| O | 4.8496910  | -0.2782250 | -0.4677260 |
| C | 4.8125880  | 0.9001320  | -0.7600690 |
| C | 5.8472310  | 1.8644250  | -0.2432370 |

|   |           |           |            |
|---|-----------|-----------|------------|
| C | 3.7070580 | 1.4749740 | -1.6058310 |
| H | 6.3362690 | 2.3732120 | -1.0790910 |
| H | 5.3464330 | 2.6272710 | 0.3619300  |
| H | 6.5858010 | 1.3371770 | 0.3597040  |
| H | 3.0858170 | 0.6815860 | -2.0231310 |
| H | 4.1173880 | 2.1049070 | -2.3997730 |
| H | 3.0976490 | 2.1174310 | -0.9582580 |

**TS10<sub>Acc</sub>** –  $E = -1337.777658$  Hartree

| Symbol | X          | Y          | Z          |
|--------|------------|------------|------------|
| O      | -6.0055900 | -0.0876660 | 2.3097980  |
| H      | -0.9887450 | -2.7720940 | -0.5420930 |
| C      | -5.7398910 | -0.3290650 | 1.1675630  |
| C      | -4.3220790 | -0.3341530 | 0.6906180  |
| C      | -3.1615010 | -0.0583930 | 1.4023900  |
| C      | -2.1396870 | -0.1941380 | 0.4859070  |
| C      | -2.7120590 | -0.5213120 | -0.8186480 |
| C      | -2.1886540 | -1.7203030 | -1.6085550 |
| O      | -1.6677630 | 1.9355290  | -0.8744970 |
| O      | -4.1261220 | -0.6342620 | -0.5567530 |
| O      | -1.9217740 | -2.8323070 | -0.8021090 |
| H      | -6.4992330 | -0.5641720 | 0.4020830  |
| H      | -3.1175820 | 0.2049750  | 2.4460670  |
| H      | -1.0733060 | -0.1285040 | 0.6396530  |
| H      | -2.5327740 | 0.4580850  | -1.3710510 |
| H      | -2.9589140 | -1.9888350 | -2.3378710 |

|   |            |            |            |
|---|------------|------------|------------|
| H | -1.2991770 | -1.3741240 | -2.1387490 |
| H | 1.4180540  | -2.1083380 | 0.2721410  |
| C | -0.3778610 | 1.8436870  | -1.1338570 |
| C | 0.4594990  | 2.4452640  | 0.0102230  |
| C | 1.9355360  | 2.2263470  | -0.2164010 |
| C | 2.1953560  | 0.7356540  | -0.3037370 |
| C | 1.3607620  | 0.1452250  | -1.4421020 |
| C | 1.4814240  | -1.3733420 | -1.5432810 |
| O | 0.2143200  | 3.8267210  | 0.1129650  |
| O | 2.7395930  | 2.7347830  | 0.8343950  |
| O | 3.5671440  | 0.4742110  | -0.5439700 |
| O | 0.0021540  | 0.4321670  | -1.2550720 |
| O | 0.8198500  | -2.0468800 | -0.4897330 |
| H | -0.0601720 | 2.3285210  | -2.0880380 |
| H | 0.1568290  | 1.9323470  | 0.9391360  |
| H | -0.7399160 | 3.9274710  | -0.0078610 |
| H | 2.2276920  | 2.6998970  | -1.1680540 |
| H | 2.4586530  | 3.6414450  | 0.9999770  |
| H | 1.8891050  | 0.2730110  | 0.6480780  |
| H | 1.7366910  | 0.5781300  | -2.3870300 |
| H | 1.0100450  | -1.7006110 | -2.4753980 |
| H | 2.5425670  | -1.6492970 | -1.5860700 |
| H | 4.0606840  | 1.1649190  | -0.0849750 |
| O | 2.7704020  | -1.8137350 | 1.4821010  |
| C | 3.9533310  | -1.6597550 | 1.2622690  |
| C | 4.6780680  | -2.4502140 | 0.2057290  |



|   |           |            |            |
|---|-----------|------------|------------|
| C | 4.7661030 | -0.6839310 | 2.0751080  |
| H | 4.9602150 | -1.7613680 | -0.5969970 |
| H | 5.5972750 | -2.8788290 | 0.6163300  |
| H | 4.0376630 | -3.2401590 | -0.1882210 |
| H | 5.1835250 | -1.2188410 | 2.9356690  |
| H | 4.1233970 | 0.1186820  | 2.4403910  |
| H | 5.5996290 | -0.2802310 | 1.4965220  |

## S7. References

- (1) Paulsen, A. D.; Mettler, M. S.; Dauenhauer, P. J. *Energy Fuels* **2013**, *27*, 2126-2134.
- (2) Nallar, M.; Wong, H.-W. *ACS Sustainable Chem. Eng.* **2019**, *7*, 9480-9488.
- (3) Nallar, M.; Wong, H.-W. *Ind. Eng. Chem. Res.* **2019**, *58*, 10776-10784.
- (4) Zhao, Y.; Truhlar, D. G. *Theor. Chem. Acc.* **2008**, *120*, 215-241.
- (5) Frisch, M. J.; Trucks, G. W.; Schlegel, H. B.; Scuseria, G. E.; Robb, M. A.; Cheeseman, J. R.; Scalmani, G.; Barone, V.; Petersson, G. A.; Nakatsuji, H.; et al. *Gaussian 16*, Rev. C.01; Gaussian, Inc.: Wallingford, CT, 2016.
- (6) Zhao, Y.; Truhlar, D. G. *J. Chem. Theory Comput.* **2008**, *4*, 1849-1868.
- (7) Grimme, S.; Antony, J.; Ehrlich, S.; Krieg, H. *J. Chem. Phys.* **2010**, *132*, 154104.
- (8) Goerigk, L.; Hansen, A.; Bauer, C.; Ehrlich, S.; Najibi, A.; Grimme, S. *Phys. Chem. Chem. Phys.* **2017**, *19*, 32184-32215.
- (9) Breneman, C. M.; Wiberg, K. B. *J. Comput. Chem.* **1990**, *11*, 361-373.
- (10) Schlegel, H. B. *J. Comput. Chem.* **1982**, *3*, 214-218.
- (11) Hratchian, H. P.; Schlegel, H. B. *J. Chem. Phys.* **2004**, *120*, 9918-9924.
- (12) Hratchian, H. P.; Schlegel, H. B. Chapter 10 - Finding minima, transition states, and following reaction pathways on ab initio potential energy surfaces. In *Theory and Applications of Computational Chemistry*, Dykstra, C. E., Frenking, G., Kim, K. S., Scuseria, G. E. Eds.; Elsevier, Amsterdam, 2005; pp 195-249.
- (13) Hratchian, H. P.; Schlegel, H. B. *J. Chem. Theory Comput.* **2005**, *1*, 61-69.
- (14) Grimme, S. *Chem. Eur. J.* **2012**, *18*, 9955-9964.
- (15) Chai, J.-D.; Head-Gordon, M. *Phys. Chem. Chem. Phys.* **2008**, *10*, 6615-6620.
- (16) Eyring, H. *J. Chem. Phys.* **1935**, *3*, 107-115.
- (17) Evans, M. G.; Polanyi, M. *Trans. Faraday Soc.* **1935**, *31*, 875-894.
- (18) COMSOL Multiphysics® v. 6.0, [www.comsol.com](http://www.comsol.com): Stockholm, Sweden.
